# Supplementary material for: A Microbial-Based Biostimulant Enhances Sweet Pepper Performance by Metabolic Reprogramming of Phytohormone Profile and Secondary Metabolism
Source: Front Plant Sci. 2020 Nov 5;11:567388. doi: 10.3389/fpls.2020.567388 (PMC7674627; doi:10.3389/fpls.2020.567388)
Supplement: Supplementary file 1 [file Table_1.XLSX]

## Sheet: ID
Title	MSI	Identification type	PRECURSORMZ	PRECURSORTYPE	RT	InChIKey
Indole-3-acetamide	1	match with standard	175.086	[M+ACN+Na]+	2.331	ZOAMBXDOGPRZLP-UHFFFAOYSA-N
Indole-3-acetyl-L-isoleucine	1	match with standard	289.154	[M+H]+	5.967	WPTUQMUCTTVOFW-BONVTDFDSA-M
Indole-3-acetyl-L-tryptophan	1	match with standard	361.999	[M+H]+	1.699	FOSPCYZZRVNHJS-IBGZPJMESA-M
INDOLE-3-PYRUVIC ACID	1	match with standard	204.075	[M+H]+	2.533	RSTKLPZEZYGQPY-UHFFFAOYSA-M
Gibberellin A4-A7	1	match with standard	348.18	[M+CH3OH+H]+	4.207	RSQSQJNRHICNNH-UKJRIFTCSA-M
Methyl jasmonate	1	match with standard	225.149	[M+H]+	7.204	GEWDNTWNSAZUDX-WQMVXFAESA-N
Trans-Zeatin-9-glucoside	1	match with standard	382.172	[M+H]+	2.672	VYRAJOITMBSQSE-GIHYWFGSSA-N
Trans-Zeatin	1	match with standard	242.101	[M+Na]+	2.814	UZKQTCBAMSWPJD-FARCUNLSSA-N
Trans-Zeatin	1	match with standard	220.121	[M+H]+	2.8	UZKQTCBAMSWPJD-FARCUNLSSA-N
indole-3-acetic acid	1	match with standard	176.071	[M+H]+	4.38	SEOVTRFCIGRIMH-UHFFFAOYSA-M
Gibberellin A3	1	match with standard	369.13	[M+Na]+	4.6	IXORZMNAPKEEDV-SNTJWBGVSA-M
indol butyric acid	1	match with standard	204.102	[M+H]+	6.59	JTEDVYBZBROSJT-UHFFFAOYSA-M
proline	2	match with experimental MS2 library	116.07	[M+H]+	1.02	ONIBWKKTOPOVIA-BYPYZUCNSA-N
Indole	2	match with experimental MS2 library	118.065	[M+H]+	3.17	SIKJAQJRHWYJAI-UHFFFAOYSA-N
Valine	2	match with experimental MS2 library	118.086	[M+H]+	1.1	KZSNJWFQEVHDMF-SGAVLPGINA-N
Indoline	2	match with experimental MS2 library	120.082	[M+H]+	2.64	KRNSYSYRLQDHDK-UHFFFAOYSA-N
Indole-3-carbinol	2	match with experimental MS2 library	130.065	[M+H-H2O]+	2.33	APEJMQOBVMLION-UHFFFAOYSA-N
2-Methylindole	2	match with experimental MS2 library	132.081	[M+H]+	3.17	CVSVTCORWBXHQV-UHFFFAOYSA-N
Isoleucine	2	match with experimental MS2 library	132.102	[M+H]+	2.11	AGPKZVBTJJNPAG-WHFBIAKZSA-N
cuminyl alcohol	2	match with experimental MS2 library	133.101	[M+H-H2O]-	4.88	MGSRCZKZVOBKFT-UHFFFAOYSA-N
Adenine	2	match with experimental MS2 library	136.062	[M+H]+	1.3	GFFGJBXGBJISGV-UHFFFAOYSA-N
3-Aminoacetophenon	2	match with experimental MS2 library	136.076	[M+H]+	1.04	LSBDFXRDZJMBSC-UHFFFAOYSA-N
3-Formylindole	2	match with experimental MS2 library	146.06	[M+H]+	3.17	OLNJUISKUQQNIM-UHFFFAOYSA-N
4-Hydroxyquinoline	2	match with experimental MS2 library	146.06	[M+H]+	2.4	FGYQUFZANKOISC-UHFFFAOYNA-N
Allysine	2	match with experimental MS2 library	146.083	[M+H]+	0.97	RKEYKDXXZCICFZ-UHFFFAOYNA-N
Spermidine	2	match with experimental MS2 library	146.165	[M+H]+	0.72	ATHGHQPFGPMSJY-UHFFFAOYSA-N
Coumaric acid (isomer of 189, 194)	2	match with experimental MS2 library	147.044	[M+H-H2O]+	4.23	NGSWKAQJJWESNS-ZZXKWVIFSA-N
4-Hydroxymandelonitrile	2	match with experimental MS2 library	150.055	[M+H]+	2.33	FFEARJCKVFRZRR-BYPYZUCNSA-N
4-Hydroxymandelonitrile	2	match with experimental MS2 library	150.056	[M+H]+	1.47	FFEARJCKVFRZRR-BYPYZUCNSA-N
Guanine	2	match with experimental MS2 library	152.057	[M+H]+	2.23	DRAVOWXCEBXPTN-UHFFFAOYSA-N
Phenylalanine	2	match with experimental MS2 library	166.087	[M+H]+	2.64	COLNVLDHVKWLRT-QMMMGPOBSA-N
Arginine	2	match with experimental MS2 library	175.119	[M+H]+	0.93	ODKSFYDXXFIFQN-BYPYZUCNSA-N
D-(+)-Glucosamine	2	match with experimental MS2 library	180.088	[M+H]+	2.33	MSWZFWKMSRAUBD-IVMDWMLBSA-N
L-TYROSINE	2	match with experimental MS2 library	182.082	[M+H]+	1.79	OUYCCCASQSFEME-QMMMGPOBSA-N
Atrazine-Desethyl	2	match with experimental MS2 library	188.072	[M+H]+	3.17	PLVPPLCLBIEYEA-WAYWQWQTSA-N
3,4-Dihydroxy-L-phenylalanine	2	match with experimental MS2 library	198.074	[M+H]+	1.9	WTDRDQBEARUVNC-LURJTMIESA-N
Tryptophan	2	match with experimental MS2 library	205.098	[M+H]+	3.17	QIVBCDIJIAJPQS-VIFPVBQESA-N
L-kynurenine	2	match with experimental MS2 library	209.093	[M+H]+	2.6	YGPSJZOEDVAXAB-QMMMGPOBSA-N
Pantothenic acid	2	match with experimental MS2 library	220.119	[M+H]+	1.59	GHOKWGTUZJEAQD-UHFFFAOYSA-N
4-Hydroxybenzoylcholine	2	match with experimental MS2 library	224.129	[M]+	2.73	BAPAICNRGIBFJT-UHFFFAOYSA-O
Cyprodinil	2	match with experimental MS2 library	226.135	[M+H]+	7.71	OTXANOLOOUNVSR-UHFFFAOYSA-N
Ala-Phe	2	match with experimental MS2 library	237.124	[M+H]+	3.18	LVWYJBNMIMPTHU-SNAWJCMRSA-N
Citrinin	2	match with experimental MS2 library	251.092	[M+H]+	3.64	CQIUKKVOEOPUDV-IYSWYEEDSA-N
Feruloyl putrescine (isomer of 1173)	2	match with experimental MS2 library	265.157	[M+H]+	3.07	SFUVCMKSYKHYLD-ALCCZGGFSA-N
Adenosine	2	match with experimental MS2 library	268.106	[M+H]+	2.17	OIRDTQYFTABQOQ-KQYNXXCUSA-N
Genistein	2	match with experimental MS2 library	271.061	[M+H]+	4.74	OBWHQJYOOCRPST-UHFFFAOYSA-N
Coumaroyl agmatine (isomer of 1296)	2	match with experimental MS2 library	277.167	[M+H]+	3.19	AKIHYQWCLCDMMI-VMPITWQZSA-N
GUANOSINE	2	match with experimental MS2 library	284.099	[M+H]+	2.23	NYHBQMYGNKIUIF-SBTUYZBDNA-N
Piperine	2	match with experimental MS2 library	286.144	[M+H]+	8.34	MXXWOMGUGJBKIW-YPCIICBESA-N
Kaempferol	2	match with experimental MS2 library	287.055	[M+H]+	4.39	IYRMWMYZSQPJKC-UHFFFAOYSA-N
Trimethoprim	2	match with experimental MS2 library	291.146	[M+H]+	4.25	RIOXQFHNBCKOKP-UHFFFAOYSA-N
FA 18:3+1O	2	match with experimental MS2 library	295.228	[M+H]+	10.49	RIGGEAZDTKMXSI-JPAZTHTMNA-N
5'-S-Methylthioadenosine	2	match with experimental MS2 library	298.098	[M+H]+	3.04	WUUGFSXJNOTRMR-IOSLPCCCSA-N
Tectorigenin	2	match with experimental MS2 library	301.072	[M+H]+	4.83	MBNGWHIJMBWFHU-UHFFFAOYSA-N
Retinoic acid	2	match with experimental MS2 library	301.217	[M+H]+	6.02	QPRQNCDEPWLQRO-SJAWMATLNA-N
Flutriafol	2	match with experimental MS2 library	302.113	[M+H]+	7.15	QPYZUFUUNHUIIL-OAHLLOKOSA-N
Koumine	2	match with experimental MS2 library	307.177	[M+H]+	3.36	UBMDAKWARMURDL-FNORWQNLSA-N
Sinapine	2	match with experimental MS2 library	310.165	[M]+	3.64	HUJXHFRXWWGYQH-UHFFFAOYSA-O
NCGC00385684-01_C12H16O8_4H-Pyran-4-one, 3-(beta-D-glucopyranosyloxy)-2-methyl-	2	match with experimental MS2 library	311.074	[M+Na]+	2.65	WXTPOHDTGNYFSB-UHFFFAOYNA-N
Traversianal	2	match with experimental MS2 library	317.212	[M+H]+	5.47	ZCTUNYRXJKLWPY-UHFFFAOYNA-N
Phytosphingosine (not validated, isomer of 1696)	2	match with experimental MS2 library	318.303	[M+H]+	8.38	AERBNCYCJBRYDG-KSZLIROESA-N
MMV687248	2	match with experimental MS2 library	321.116	[M+H]+	1.46	PWAACAMQKVIVPZ-UHFFFAOYSA-N
Pyriproxyfen	2	match with experimental MS2 library	322.144	[M+H]+	10.76	WVIITJBBQPBPEB-UHFFFAOYSA-N
NCGC00168877-02_C15H20O8_3-(4-Hydroxyphenyl)-3-oxopropyl beta-D-glucopyranoside	2	match with experimental MS2 library	351.106	[M+Na]+	2.42	GEVWHIDSUOMVRI-YAWGZTSLNA-N
4-Caffeoylquinic acid	2	match with experimental MS2 library	355.103	[M+H]+	3.45	GYFFKZTYYAFCTR-PCEXOASVNA-N
NCGC00385387-01_C16H28O7_4-(Hydroxymethyl)-1-isopropyl-3-cyclohexen-1-yl beta-D-glucopyranoside	2	match with experimental MS2 library	355.173	[M+Na]+	4.37	JLDWWSSQBYGULG-UHFFFAOYNA-N
Melibiose	2	match with experimental MS2 library	365.106	[M+Na]+	1.17	DLRVVLDZNNYCBX-ABXHMFFYSA-N
NCGC00385079-01_C19H34O7_4-(4-Hydroxy-2,6,6-trimethyl-1-cyclohexen-1-yl)-2-butanyl beta-D-glucopyranoside	2	match with experimental MS2 library	397.221	[M+Na]+	5.88	UJRMJTIXXKZFGB-UHFFFAOYNA-N
Azoxystrobin	2	match with experimental MS2 library	404.125	[M+H]+	8.63	TVJHJRXOIAMNSY-YADHBBJMSA-N
NCGC00385291-01_C19H30O8_3-Buten-2-one, 4-[4-(beta-D-glucopyranosyloxy)-2-hydroxy-2,6,6-trimethylcyclohexylidene]-	2	match with experimental MS2 library	409.184	[M+Na]+	4.54	SWYRVCGNMNAFEK-AATRIKPKNA-N
NCGC00380213-01_C19H32O8_2-Butanone, 4-[3-(beta-D-glucopyranosyloxy)-4-hydroxy-2,6,6-trimethyl-1-cyclohexen-1-yl]-	2	match with experimental MS2 library	411.2	[M+Na]+	4.58	QFTPTUOKFIIFJH-AATRIKPKNA-N
N6-Threonylcarbamoyladenosine	2	match with experimental MS2 library	413.143	[M+H]+	3.22	YCIAHAYEVBEGKT-UHFFFAOYNA-N
Pesticide4_Azoxystrobin_C22H17N3O5_Methyl (2E)-2-(2-{[6-(2-cyanophenoxy)pyrimidin-4-yl]oxy}phenyl)-3-methoxyprop-2-enoate	2	match with experimental MS2 library	426.107	[M+Na]+	8.63	TVJHJRXOIAMNSY-YADHBBJMSA-N
Pelargonidin-3-O-glucoside	2	match with experimental MS2 library	433.114	[M]+	4.89	ABVCUBUIXWJYSE-UHFFFAOYNA-O
NCGC00385086-01_C19H28O10_2-Phenylethyl 2-O-[(2S,3R,4R)-3,4-dihydroxy-4-(hydroxymethyl)tetrahydro-2-furanyl]-beta-D-glucopyranoside	2	match with experimental MS2 library	439.158	[M+Na]+	3.49	ZRGXCWYRIBRSQA-UHFFFAOYNA-N
Lovastatin hydroxy acid observed in lovastatin standard	2	match with experimental MS2 library	445.259	[M+Na]+	7.43	CPXUZWJJNBFVEE-WAKBTOJMNA-N
Luteolin-4'-O-glucoside	2	match with experimental MS2 library	449.108	[M+H]+	4.5	PEFNSGRTCBGNAN-QNDFHXLGSA-N
NCGC00384740-01_C21H34O9_2(1H)-Azulenone, 6-(beta-D-glucopyranosyloxy)-4,5,6,7,8,8a-hexahydro-5-hydroxy-5-(1-hydroxy-1-methylethyl)-3,8-dimethyl-	2	match with experimental MS2 library	453.211	[M+Na]+	4.66	ZKDJPRDXYUPPEK-KIVLJSFPNA-N
LPE 18:2	2	match with experimental MS2 library	478.293	[M+H]+	9.78	SVRBKLJIDJHADS-USWSLJGRSA-N
PC(16:0/0:0)	2	match with experimental MS2 library	496.341	[M+H]+	10.45	ASWBNKHCZGQVJV-HSZRJFAPSA-N
Indoxacarb	2	match with experimental MS2 library	528.079	[M+H]+	10.42	ACPLOCGAXUGQHB-CDSIGGHENA-N
Apiin	2	match with experimental MS2 library	565.157	[M+H]+	4.74	OMWBSQBBFSNJKL-SFGIUNDLNA-N
NP-000062(6)	2	match with experimental MS2 library	565.158	[M+H]+	4.05	MMDUKUSNQNWVET-UHFFFAOYNA-N
Cyanidine-3-O-sambubioside	2	match with experimental MS2 library	581.152	[M]+	4.39	ZPPQIOUITZSYAO-UHFFFAOYNA-O
5-[6-[[3,4-dihydroxy-4-(hydroxymethyl)oxolan-2-yl]oxymethyl]-3,4,5-trihydroxyoxan-2-yl]oxy-4-(3,4-dihydroxyphenyl)-7-methoxychromen-2-one	2	match with experimental MS2 library	595.167	[M+H]+	4.83	YONLJLRPNAUKHY-UHFFFAOYNA-N
NP-000002(10)	2	match with experimental MS2 library	595.168	[M+H]+	3.7	MGYBYJXAXUBTQF-ASMASBODNA-N
Delphinidin-3-O-sambubioside	2	match with experimental MS2 library	597.146	[M]+	3.97	TWYYVOVDSNRIJM-UHFFFAOYNA-O
NAD	2	match with experimental MS2 library	664.118	[M+H]+	1.6	LFERELMXERXKKQ-KMXXXSRASA-N
NCGC00385284-01_C32H54O13_(2E)-5-{(1R,4aS,5S,6R,8aS)-5-[(beta-D-Glucopyranosyloxy)methyl]-6-hydroxy-5,8a-dimethyl-2-methylenedecahydro-1-naphthalenyl}-3-methyl-2-penten-1-yl beta-D-glucopyranoside	2	match with experimental MS2 library	669.348	[M+Na]+	5.84	QIOMMMCQFIBVKA-MHWRWJLKNA-N
Spinosyn A	2	match with experimental MS2 library	732.47	[M+H]+	8	SRJQTHAZUNRMPR-SBOQKJDQNA-N
Cyanidin-3-O-sambubioside-5-O-glucoside	2	match with experimental MS2 library	743.205	[M]+	3.79	RAHCBDLMLRVOBZ-UHFFFAOYNA-O
Triumferol;4-hydroxyisoxazol	3	in silico MS2 and RT prediction with MSFINDER and Retip	103.054	[M+NH4]+	4.12	ABFBKQBATYREHU-UHFFFAOYSA-N
Cycloserine	3	in silico MS2 and RT prediction with MSFINDER and Retip	103.054	[M+H]+	1.96	DYDCUQKUCUHJBH-RUOZJJLTNA-N
UNPD119746	3	in silico MS2 and RT prediction with MSFINDER and Retip	109.045	[M+NH4]+	7.15	LSLVHNSGLHQBDX-UHFFFAOYSA-N
S-Methyl methanesulfinothioate	3	in silico MS2 and RT prediction with MSFINDER and Retip	110.997	[M+H]+	1.55	RRGUMJYEQDVBFP-UHFFFAOYNA-N
Glutinic acid	3	in silico MS2 and RT prediction with MSFINDER and Retip	111.008	[M+H-H2O]+	1.39	FEFVVCZNGBRBSB-UHFFFAOYNA-N
Heptanenitrile	3	in silico MS2 and RT prediction with MSFINDER and Retip	112.112	[M+H]+	0.72	SDAXRHHPNYTELL-UHFFFAOYSA-N
2-Thiophenecarboxaldehyde	3	in silico MS2 and RT prediction with MSFINDER and Retip	113	[M+H]+	0.98	CNUDBTRUORMMPA-UHFFFAOYSA-N
2-Thiophenecarboxaldehyde	3	in silico MS2 and RT prediction with MSFINDER and Retip	113	[M+H]+	1.07	CNUDBTRUORMMPA-UHFFFAOYSA-N
4-Coumaryl alcohol	3	in silico MS2 and RT prediction with MSFINDER and Retip	115.055	[M+H-2H2O]+	7.25	PTNLHDGQWUGONS-OWOJBTEDSA-N
Di-2-propenyl sulfide	3	in silico MS2 and RT prediction with MSFINDER and Retip	115.059	[M+H]+	3.17	UBJVUCKUDDKUJF-UHFFFAOYSA-N
L-Valine	3	in silico MS2 and RT prediction with MSFINDER and Retip	118.087	[M+H]+	0.97	KZSNJWFQEVHDMF-SGAVLPGINA-N
2,4,6-Octatriyn-1-ol	3	in silico MS2 and RT prediction with MSFINDER and Retip	119.049	[M+H]+	1.8	CDDRQTICNABTAT-UHFFFAOYSA-N
2,4,6-Octatriyn-1-ol	3	in silico MS2 and RT prediction with MSFINDER and Retip	119.049	[M+H]+	2.87	CDDRQTICNABTAT-UHFFFAOYSA-N
2,4-Diaminobutyric acid	3	in silico MS2 and RT prediction with MSFINDER and Retip	119.086	[M+H]+	8.89	OGNSCSPNOLGXSM-UHFFFAOYNA-N
4-Hydroxystyrene	3	in silico MS2 and RT prediction with MSFINDER and Retip	121.065	[M+H]+	1.96	FUGYGGDSWSUORM-UHFFFAOYSA-N
Santene	3	in silico MS2 and RT prediction with MSFINDER and Retip	123.117	[M+H]+	5.78	LSIXBBPOJBJQHN-UHFFFAOYNA-N
Santene	3	in silico MS2 and RT prediction with MSFINDER and Retip	123.117	[M+H]+	3.84	LSIXBBPOJBJQHN-UHFFFAOYNA-N
2-Hydroxypyridine	3	in silico MS2 and RT prediction with MSFINDER and Retip	128.062	[M+CH3OH+H]+	10.86	UBQKCCHYAOITMY-UHFFFAOYSA-N
(??)-4-Methylene-2-pyrrolidinecarboxylic acid	3	in silico MS2 and RT prediction with MSFINDER and Retip	128.062	[M+H]+	7.25	PEYQZZMUNYLHII-UHFFFAOYNA-N
L-trans-5-Hydroxy-2-piperidinecarboxylic acid	3	in silico MS2 and RT prediction with MSFINDER and Retip	128.071	[M+H-H2O]+	0.97	RKEYKDXXZCICFZ-UHFFFAOYNA-N
cinnamamide	3	in silico MS2 and RT prediction with MSFINDER and Retip	130.066	[M+H-H2O]+	3.17	APEJMQOBVMLION-UHFFFAOYSA-N
Rosefuran;3-Methyl-2-(3-methyl-2-butenyl)furan	3	in silico MS2 and RT prediction with MSFINDER and Retip	133.101	[M+H-H2O]+	3.86	UTSGPHXOHJSDBC-UHFFFAOYSA-N
1-benzofuran-4-ol	3	in silico MS2 and RT prediction with MSFINDER and Retip	135.044	[M+H]+	3.45	CFBCZETZIPZOGW-UHFFFAOYSA-N
1-benzofuran-4-ol	3	in silico MS2 and RT prediction with MSFINDER and Retip	135.044	[M+H]+	2.55	CFBCZETZIPZOGW-UHFFFAOYSA-N
3-Methyl-2-butene-1-thiol	3	in silico MS2 and RT prediction with MSFINDER and Retip	135.081	[M+CH3OH+H]+	8.9	GYDPOKGOQFTYGW-UHFFFAOYSA-N
(Z)-2-Methyl-6-methylene-2,7-octadien-1-ol	3	in silico MS2 and RT prediction with MSFINDER and Retip	135.125	[M+H-H2O]+	3.95	IEVYLQISZQFFGA-JXMROGBWSA-N
p-Cymene	3	in silico MS2 and RT prediction with MSFINDER and Retip	135.118	[M+H]+	5.06	HFPZCAJZSCWRBC-UHFFFAOYSA-N
Adenine	3	in silico MS2 and RT prediction with MSFINDER and Retip	136.062	[M+H]+	1.33	GFFGJBXGBJISGV-UHFFFAOYSA-N
10-Deoxyeucommiol	3	in silico MS2 and RT prediction with MSFINDER and Retip	137.096	[M+H-2H2O]+	4.88	WUSPNVLGDGOZEV-DXSNHNKPNA-N
4-Hydroxystyrene	3	in silico MS2 and RT prediction with MSFINDER and Retip	138.092	[M+NH4]+	1.82	FUGYGGDSWSUORM-UHFFFAOYSA-N
1,3-Dimethyluracil	3	in silico MS2 and RT prediction with MSFINDER and Retip	141.071	[M+H]+	6.5	JSDBKAHWADVXFU-UHFFFAOYSA-N
UNPD107921	3	in silico MS2 and RT prediction with MSFINDER and Retip	145.029	[M+H]+	3.07	DZBDPYYHMFWNKZ-BQYQJAHWSA-N
L-trans-5-Hydroxy-2-piperidinecarboxylic acid	3	in silico MS2 and RT prediction with MSFINDER and Retip	146.071	[M+H]+	1.54	RKEYKDXXZCICFZ-UHFFFAOYNA-N
Coumarin	3	in silico MS2 and RT prediction with MSFINDER and Retip	147.045	[M+H]+	1.8	ZYGHJZDHTFUPRJ-UHFFFAOYSA-N
beta-Thujaplicin	3	in silico MS2 and RT prediction with MSFINDER and Retip	147.081	[M+H-H2O]+	7.68	FUWUEFKEXZQKKA-UHFFFAOYSA-N
(S)-Oleuropeic acid	3	in silico MS2 and RT prediction with MSFINDER and Retip	149.097	[M+H-2H2O]+	4.48	BFYWJELXORKNFO-UHFFFAOYNA-N
UNPD159648	3	in silico MS2 and RT prediction with MSFINDER and Retip	154.968	[M+H]+	0.79	HSZDDRSVTXPREG-JLDDOWRYNA-N
furanomycin	3	in silico MS2 and RT prediction with MSFINDER and Retip	158.082	[M+H]+	2.69	PNOKUGWGMLEAPE-LMPMJJBRNA-N
2-Keto-L-gluconate	3	in silico MS2 and RT prediction with MSFINDER and Retip	159.029	[M+H-2H2O]+	1.75	VBUYCZFBVCCYFD-UHFFFAOYNA-N
4-Hydroxycinnamic acid	3	in silico MS2 and RT prediction with MSFINDER and Retip	165.055	[M+H]+	1.79	NGSWKAQJJWESNS-ZZXKWVIFSA-N
Oxalureate	3	in silico MS2 and RT prediction with MSFINDER and Retip	165.055	[M+CH3OH+H]+	1.3	UWBHMRBRLOJJAA-UHFFFAOYSA-N
Rehmaglutin A	3	in silico MS2 and RT prediction with MSFINDER and Retip	167.071	[M+H-2H2O]+	2.46	QMQZZRSFTSGWJA-GRLMZUJMNA-N
(-)-Lupinine	3	in silico MS2 and RT prediction with MSFINDER and Retip	170.155	[M+H]+	4.19	HDVAWXXJVMJBAR-NLJMKPLXNA-N
L-Isoleucine	3	in silico MS2 and RT prediction with MSFINDER and Retip	173.133	[M+ACN+H]+	3.86	AGPKZVBTJJNPAG-WHFBIAKZSA-N
C00050425	3	in silico MS2 and RT prediction with MSFINDER and Retip	173.133	[M+H]+	7.68	JMACEDIUUMWDIC-UHFFFAOYSA-N
Calystegine B2	3	in silico MS2 and RT prediction with MSFINDER and Retip	176.092	[M+H]+	2.11	FXFBVZOJVHCEDO-UHFFFAOYNA-N
2,5-Dideoxy-2,5-imino-glycero-D-manno-heptitol	3	in silico MS2 and RT prediction with MSFINDER and Retip	176.092	[M+H-H2O]+	1.4	ZJRUOSSQTZGFJV-LGLUPNRXNA-N
UNPD107921	3	in silico MS2 and RT prediction with MSFINDER and Retip	177.055	[M+CH3OH+H]+	2.45	DZBDPYYHMFWNKZ-BQYQJAHWSA-N
Canavanine	3	in silico MS2 and RT prediction with MSFINDER and Retip	177.092	[M+H]+	10.74	FSBIGDSBMBYOPN-VKHMYHEASA-N
(R)C(R)S-S-Propylcysteine sulfoxide	3	in silico MS2 and RT prediction with MSFINDER and Retip	180.064	[M+H]+	2.81	JZKMSAGUCSIIAH-UHFFFAOYNA-N
L-Tyrosine	3	in silico MS2 and RT prediction with MSFINDER and Retip	182.082	[M+H]+	1.33	OUYCCCASQSFEME-QMMMGPOBSA-N
UNPD59727	3	in silico MS2 and RT prediction with MSFINDER and Retip	182.963	[M+H]+	0.79	STCROAQXEXRGDO-UHFFFAOYSA-N
L-trans-5-Hydroxy-2-piperidinecarboxylic acid	3	in silico MS2 and RT prediction with MSFINDER and Retip	184.038	[M+K]+	0.96	RKEYKDXXZCICFZ-UHFFFAOYNA-N
UNPD107921	3	in silico MS2 and RT prediction with MSFINDER and Retip	186.056	[M+ACN+H]+	3.07	DZBDPYYHMFWNKZ-BQYQJAHWSA-N
13-Tetradecene-2,4-diyn-1-ol	3	in silico MS2 and RT prediction with MSFINDER and Retip	187.156	[M+H-H2O]+	2.18	CENJVOWTHMJWMU-UHFFFAOYSA-N
UNPD13515	3	in silico MS2 and RT prediction with MSFINDER and Retip	188.998	[M+CH3OH+H]+	1.96	PVUZSKRNQWELBA-JLDDOWRYNA-N
(2R*,3R*)-1,2,3-Butanetriol	3	in silico MS2 and RT prediction with MSFINDER and Retip	189.128	[M+2ACN+H]+	4.06	YAXKTBLXMTYWDQ-UHFFFAOYNA-N
(R)-1-Methyl-4-(1-methyl-5-hexenyl)-benzene	3	in silico MS2 and RT prediction with MSFINDER and Retip	189.165	[M+H]+	6.74	DZEUFPKQXVLZSZ-UGPWUYPHNA-N
alpha-Irone	3	in silico MS2 and RT prediction with MSFINDER and Retip	189.172	[M+H-H2O]+	6.02	JZQOJFLIJNRDHK-CMDGGOBGNA-N
UNPD7257	3	in silico MS2 and RT prediction with MSFINDER and Retip	191.144	[M+CH3OH+H]+	4.88	AXPHAVGYWGSHTC-RKRUEEIYNA-N
2,4,5,7alpha-Tetrahydro-1,4,4,7a-tetramethyl-1H-inden-2-ol	3	in silico MS2 and RT prediction with MSFINDER and Retip	193.159	[M+H]+	4.61	MHUYBIUXLMLCJM-UHFFFAOYNA-N
D-rhodosamine	3	in silico MS2 and RT prediction with MSFINDER and Retip	193.159	[M+NH4]+	5.06	WMUYJHSRMOORHK-PRJMDXOYSA-N
4,5-Dimethyl-2-(1-methylethyl)thiazole	3	in silico MS2 and RT prediction with MSFINDER and Retip	197.118	[M+ACN+H]+	4.01	GDYKEHYOOVICQZ-UHFFFAOYSA-N
UNPD129076	3	in silico MS2 and RT prediction with MSFINDER and Retip	200.182	[M+H]+	9.77	HBHGMQINEHMWLF-XFXZXTDPSA-N
Zwiebelane B	3	in silico MS2 and RT prediction with MSFINDER and Retip	200.974	[M+K]+	0.79	MDLUYFYDCNUJHX-UHFFFAOYNA-N
UNPD116762	3	in silico MS2 and RT prediction with MSFINDER and Retip	201.055	[M+H]+	9.28	KBNUSDIWDFUIEP-UHFFFAOYSA-N
alpha-Corocalene	3	in silico MS2 and RT prediction with MSFINDER and Retip	201.165	[M+H]+	7.68	VTUZIFHLLUSULC-UHFFFAOYSA-N
(2-Furanylmethyl) methyl disulfide	3	in silico MS2 and RT prediction with MSFINDER and Retip	202.03	[M+ACN+H]+	2.31	CLSLQQCDHOZMDT-UHFFFAOYSA-N
(E)-1-Cinnamoylpyrrolidine	3	in silico MS2 and RT prediction with MSFINDER and Retip	202.123	[M+H]+	4.13	JSIGICUAXLIURX-HJWRWDBZSA-N
(8alpha,10beta,11beta)-3-Hydroxy-4,15-dinor-1(5)-xanthen-12,8-olide	3	in silico MS2 and RT prediction with MSFINDER and Retip	207.139	[M+H-H2O]+	4.53	MOXJTUNOIGNZKZ-UHFFFAOYNA-N
Tiglylcarnitine	3	in silico MS2 and RT prediction with MSFINDER and Retip	208.134	[M+H-2H2O]+	3.59	WURBQCVBQNMUQT-NJUMROAHNA-N
10-Hydroxy-2,8-decadiene-4,6-diynoic acid	3	in silico MS2 and RT prediction with MSFINDER and Retip	209.082	[M+CH3OH+H]+	4.35	AJSNUBLNFVLJEB-CGXWXWIYSA-N
Methyl (2E,6Z)-dodecadienoate	3	in silico MS2 and RT prediction with MSFINDER and Retip	211.17	[M+H]+	5.06	IYSZVOVZPVKXIJ-OFALOCIGSA-N
UNPD205712	3	in silico MS2 and RT prediction with MSFINDER and Retip	214.997	[M+Na]+	1.55	NEZIQARJVNGXQQ-UHFFFAOYSA-N
(+)-vulgraon B	3	in silico MS2 and RT prediction with MSFINDER and Retip	217.196	[M+H]+	6.18	XHHIKHVPBSQUIJ-VKJZCYHPSA-N
N-a-Acetylcitrulline	3	in silico MS2 and RT prediction with MSFINDER and Retip	218.118	[M+H]+	2.87	WMQMIOYQXNRROC-UHFFFAOYNA-N
5-Hydroxy-L-tryptophan	3	in silico MS2 and RT prediction with MSFINDER and Retip	221.093	[M+H]+	1.92	LDCYZAJDBXYCGN-UHFFFAOYNA-N
Dehydrovomifoliol	3	in silico MS2 and RT prediction with MSFINDER and Retip	223.134	[M+H]+	3.12	JJRYPZMXNLLZFH-AATRIKPKNA-N
UNPD59727	3	in silico MS2 and RT prediction with MSFINDER and Retip	223.989	[M+ACN+H]+	0.79	STCROAQXEXRGDO-UHFFFAOYSA-N
Deoxyvalidamine	3	in silico MS2 and RT prediction with MSFINDER and Retip	225.113	[M+ACN+Na]+	4.27	FFRMLFVGYPMNPT-VTPUDEAPNA-N
3,3,3-tetramine	3	in silico MS2 and RT prediction with MSFINDER and Retip	227.165	[M+K]+	4.58	ZAXCZCOUDLENMH-UHFFFAOYSA-N
Blumenol B	3	in silico MS2 and RT prediction with MSFINDER and Retip	227.166	[M+H]+	7.48	CWOFGGNDZOPNFG-RLQDDWLSNA-N
11-Hydroxy-9-tridecenoic acid	3	in silico MS2 and RT prediction with MSFINDER and Retip	229.176	[M+H]+	1.62	NSVPCFNUUARRKL-CSKARUKUNA-N
(S)-Spinacine	3	in silico MS2 and RT prediction with MSFINDER and Retip	231.084	[M+ACN+Na]+	1.93	YCFJXOFFQLPCHD-UHFFFAOYNA-N
Diosphenol;Buccocamphor	3	in silico MS2 and RT prediction with MSFINDER and Retip	232.134	[M+ACN+Na]+	4.55	QSIMLPCPCXVYDD-UHFFFAOYNA-N
Gibbilimbol B	3	in silico MS2 and RT prediction with MSFINDER and Retip	233.191	[M+H]+	8.87	RQVUFITWWLNDGP-BQYQJAHWSA-N
Gibbilimbol A	3	in silico MS2 and RT prediction with MSFINDER and Retip	233.191	[M+H]+	9.06	LMJPVRXXPPOFAM-VOTSOKGWSA-N
Cryptoechinulin G	3	in silico MS2 and RT prediction with MSFINDER and Retip	237.651	[M+NH4]2+	2.37	HPZFXKBNCMYWKJ-JLPGSUDCSA-N
9-Angelylplatynecine;9-Angeloylplatynecine	3	in silico MS2 and RT prediction with MSFINDER and Retip	240.16	[M+H]+	3.75	FOWFFDPFIJUTGG-SPOUHCTFNA-N
UNPD102522	3	in silico MS2 and RT prediction with MSFINDER and Retip	241.156	[M+H]+	1.69	MEFPAPWNDHCGJX-LDGXTIHJNA-N
Dehydrofalcarinone	3	in silico MS2 and RT prediction with MSFINDER and Retip	241.16	[M+H]+	5.71	HLHBDMWPPKHNDQ-KHPPLWFESA-N
Diospyrin	3	in silico MS2 and RT prediction with MSFINDER and Retip	242.563	[M+H]2+	1.45	XCZZWPJIGBONJX-UHFFFAOYNA-N
Falcarinone	3	in silico MS2 and RT prediction with MSFINDER and Retip	243.175	[M+H]+	7.25	UQEBOJRXTNLPKZ-ZHACJKMWSA-N
Pyridoxal 5'-phosphate	3	in silico MS2 and RT prediction with MSFINDER and Retip	248.033	[M+H]+	1.64	NGVDGCNFYWLIFO-UHFFFAOYSA-N
2-Amino-3-carboxymuconic acid semialdehyde	3	in silico MS2 and RT prediction with MSFINDER and Retip	249.043	[M+ACN+Na]+	0.97	KACPVQQHDVBVFC-OIFXTYEKSA-N
Pyridoxine 5'-phosphate	3	in silico MS2 and RT prediction with MSFINDER and Retip	250.039	[M+H]+	1.3	WHOMFKWHIQZTHY-UHFFFAOYSA-N
Capillin	3	in silico MS2 and RT prediction with MSFINDER and Retip	251.116	[M+2ACN+H]+	2.74	RAZOKRUZEQERLH-UHFFFAOYSA-N
Buntansin A	3	in silico MS2 and RT prediction with MSFINDER and Retip	253.072	[M+CH3OH+H]+	3.46	GQYZDAIERJIQDI-UHFFFAOYSA-N
3alpha-Hydroxyoreadone	3	in silico MS2 and RT prediction with MSFINDER and Retip	253.153	[M+H]+	3.28	QWJVXAZUVABFEO-UHFFFAOYNA-N
UNPD110703	3	in silico MS2 and RT prediction with MSFINDER and Retip	254.15	[M+CH3OH+H]+	1.77	MFQXBXBSFUOYDE-UHFFFAOYSA-N
p-Menthane-3,8-diol	3	in silico MS2 and RT prediction with MSFINDER and Retip	255.212	[M+2ACN+H]+	6.74	LMXFTMYMHGYJEI-UHFFFAOYNA-N
Capric acid	3	in silico MS2 and RT prediction with MSFINDER and Retip	255.212	[M+2ACN+H]+	7.7	GHVNFZFCNZKVNT-UHFFFAOYSA-N
Calamendiol	3	in silico MS2 and RT prediction with MSFINDER and Retip	256.228	[M+NH4]+	5.35	AHNGXHRYFGQWSL-UHFFFAOYNA-N
10-Hydroxy-3-methoxy-1,3,5,7-cadinatetraen-9-one	3	in silico MS2 and RT prediction with MSFINDER and Retip	261.145	[M+H]+	3.35	VMEKKHYIQYOLHA-UHFFFAOYNA-N
Dinortrixagone	3	in silico MS2 and RT prediction with MSFINDER and Retip	261.222	[M+H]+	6.53	KEXFACKEWVXUJY-XCSPAJKHNA-N
N-Undecanoylglycine	3	in silico MS2 and RT prediction with MSFINDER and Retip	261.222	[M+NH4]+	9.91	HEUQYIQQCNOXOG-UHFFFAOYSA-N
15,16-Dinor-8(17),11E-labdadien-13-one	3	in silico MS2 and RT prediction with MSFINDER and Retip	261.222	[M+H]+	9.05	GWLGWWOKIBLQJF-JNAWLDEBNA-N
UNPD59727	3	in silico MS2 and RT prediction with MSFINDER and Retip	265.016	[M+2ACN+H]+	0.78	STCROAQXEXRGDO-UHFFFAOYSA-N
Homoneoharringtonine	3	in silico MS2 and RT prediction with MSFINDER and Retip	266.118	[M+H-H2O]2+	2.99	MVPLNIOIJYAVJX-ZIQARRDVNA-N
(2xi,6xi)-7-Methyl-3-methylene-1,2,6,7-octanetetrol	3	in silico MS2 and RT prediction with MSFINDER and Retip	268.155	[M+ACN+Na]+	3.77	GGDOZDCNLKHEMH-UHFFFAOYNA-N
C17 sphingosine(1+)	3	in silico MS2 and RT prediction with MSFINDER and Retip	268.264	[M+H-H2O]+	8.95	RBEJCQPPFCKTRZ-LHMZYYNSSA-O
1,3-Diphenethylurea;N,N'-Bis(phenethyl)urea;N,N'-Diphenethylurea;NSC 25433	3	in silico MS2 and RT prediction with MSFINDER and Retip	269.161	[M+H]+	1.73	VMQLWVGHPWFHEI-UHFFFAOYSA-N
Andrachcinidine;(-)-Andrachcinidine	3	in silico MS2 and RT prediction with MSFINDER and Retip	269.227	[M+ACN+H]+	5.68	GFVMHSQLCIEXNG-PCRUOVEUNA-N
anhydroretinol	3	in silico MS2 and RT prediction with MSFINDER and Retip	269.228	[M+H]+	6.71	FWNRILWHNGFAIN-OYUWDNMLSA-N
UNPD80848	3	in silico MS2 and RT prediction with MSFINDER and Retip	269.227	[M+CH3OH+H]+	5.84	HAFKZVUKGWPUNX-PJMYMDMSNA-N
Isoretrohoustine	3	in silico MS2 and RT prediction with MSFINDER and Retip	270.171	[M+H]+	3.65	RAOAKLAJPBMMLW-WZPAWTPMNA-N
UNPD19003	3	in silico MS2 and RT prediction with MSFINDER and Retip	272.295	[M+CH3OH+H]+	8.78	BOCVLEJSICULOK-XISACWJONA-N
UNPD112107	3	in silico MS2 and RT prediction with MSFINDER and Retip	275.017	[M+K]+	1.91	CQBQTNMBPLCAHQ-VNJVJOIJNA-N
(10Z,14E,16E)-10,14,16-Octadecatrien-12-ynoic acid	3	in silico MS2 and RT prediction with MSFINDER and Retip	275.201	[M+H]+	11.02	KDVOULUCGQGVQH-IUDSIRJBSA-N
Apo-13-zeaxanthinone	3	in silico MS2 and RT prediction with MSFINDER and Retip	275.201	[M+H]+	6.53	JLNMEHQAHDSEEE-DIYOHSKXNA-N
Apo-13-zeaxanthinone	3	in silico MS2 and RT prediction with MSFINDER and Retip	275.201	[M+H]+	8.49	JLNMEHQAHDSEEE-DIYOHSKXNA-N
UNPD182023	3	in silico MS2 and RT prediction with MSFINDER and Retip	277.106	[M+K]+	3.1	JRENDKNOMRUMBT-WGGBWDBONA-N
Sophorasine A	3	in silico MS2 and RT prediction with MSFINDER and Retip	277.159	[M+H]+	3.73	TYNIDTXHMHOCQE-BLASDBQBNA-N
Serratine	3	in silico MS2 and RT prediction with MSFINDER and Retip	280.191	[M+H]+	4.44	SWDKDXWGADMDSP-HWSQZMMLNA-N
13-Hydroxyabscisic acid	3	in silico MS2 and RT prediction with MSFINDER and Retip	281.139	[M+H]+	8.89	AVFORCKFTWHFAR-UMCKCUICNA-N
Floribundine	3	in silico MS2 and RT prediction with MSFINDER and Retip	282.155	[M+H]+	2.42	AKXOIHNFHOEPHN-UHFFFAOYNA-N
(S)-9-Hydroxy-10-undecenoic acid	3	in silico MS2 and RT prediction with MSFINDER and Retip	283.207	[M+2ACN+H]+	6.74	CJUFNYIRKDOQMC-UHFFFAOYNA-N
Antibiotic KA 7367B;KA 7367B;Maniwamycin B	3	in silico MS2 and RT prediction with MSFINDER and Retip	283.207	[M+2ACN+H]+	7.7	YSGFBXZSDXVSLM-GVRJNNHDNA-N
3-Hydroxynonyl acetate	3	in silico MS2 and RT prediction with MSFINDER and Retip	285.222	[M+2ACN+H]+	5.62	RTYFAKSWXDNPPU-UHFFFAOYNA-N
UNPD167264	3	in silico MS2 and RT prediction with MSFINDER and Retip	285.291	[M+H-H2O]+	7.38	VKBQNDASXFVXJJ-GGTUPCLFNA-N
Vitamin A	3	in silico MS2 and RT prediction with MSFINDER and Retip	287.238	[M+H]+	5.84	FPIPGXGPPPQFEQ-OVSJKPMPSA-N
Vitamin A	3	in silico MS2 and RT prediction with MSFINDER and Retip	287.238	[M+H]+	6.83	FPIPGXGPPPQFEQ-OVSJKPMPSA-N
Leucyl-Arginine	3	in silico MS2 and RT prediction with MSFINDER and Retip	288.204	[M+H]+	2.19	SENJXOPIZNYLHU-UHFFFAOYNA-N
Lauroyl diethanolamide	3	in silico MS2 and RT prediction with MSFINDER and Retip	288.259	[M+H]+	9.16	AOMUHOFOVNGZAN-UHFFFAOYSA-N
Methylarctate B	3	in silico MS2 and RT prediction with MSFINDER and Retip	291.021	[M+H]+	1.23	ALURPXNWYGHPFR-UHFFFAOYSA-N
Sclareol	3	in silico MS2 and RT prediction with MSFINDER and Retip	291.269	[M+H-H2O]+	6.42	XVULBTBTFGYVRC-UHFFFAOYNA-N
3-Oxo-2-(2-entenyl)cyclopentaneoctanoic acid;OPC-8:0	3	in silico MS2 and RT prediction with MSFINDER and Retip	295.227	[M+H]+	8.52	BZXZFDKIRZBJEP-HQYJUFBQNA-N
UNPD130054	3	in silico MS2 and RT prediction with MSFINDER and Retip	296.943	[M+K]+	0.79	ZNTHHYHHUONGDY-ACAGNQJTSA-N
Hebelophyllene G;(-)-Hebelophyllene G	3	in silico MS2 and RT prediction with MSFINDER and Retip	299.186	[M+H]+	8.39	AEOAKDQHDIICMZ-OQNOCLRMNA-N
S-(2-Methylpropionyl)-dihydrolipoamide-E	3	in silico MS2 and RT prediction with MSFINDER and Retip	300.106	[M+Na]+	2.23	UEFURMXXHJCLJP-UHFFFAOYNA-N
Isoretrohoustine	3	in silico MS2 and RT prediction with MSFINDER and Retip	302.197	[M+CH3OH+H]+	3.22	RAOAKLAJPBMMLW-WZPAWTPMNA-N
Isopimaric acid	3	in silico MS2 and RT prediction with MSFINDER and Retip	303.228	[M+H]+	3.26	MXYATHGRPJZBNA-UHFFFAOYNA-N
1,2-Bis(1-ethoxyethoxy)propane	3	in silico MS2 and RT prediction with MSFINDER and Retip	303.233	[M+2ACN+H]+	5.62	TZVJNJVDGXFMCF-UHFFFAOYNA-N
Isopimaric acid	3	in silico MS2 and RT prediction with MSFINDER and Retip	303.233	[M+H]+	7.88	MXYATHGRPJZBNA-UHFFFAOYNA-N
5-Thymidylic acid	3	in silico MS2 and RT prediction with MSFINDER and Retip	305.046	[M+H-H2O]+	2.42	GYOZYWVXFNDGLU-XLPZGREQSA-N
2'-Deoxymugineic acid	3	in silico MS2 and RT prediction with MSFINDER and Retip	305.135	[M+H]+	1.18	CUZKLRTTYZOCSD-UHFFFAOYNA-N
(S)-[8]-Gingerol	3	in silico MS2 and RT prediction with MSFINDER and Retip	305.219	[M+H-H2O]+	9.19	BCIWKKMTBRYQJU-UHFFFAOYNA-N
5-Androstene-3b,16b,17a-triol	3	in silico MS2 and RT prediction with MSFINDER and Retip	307.228	[M+H]+	7.47	GUGSXATYPSGVAY-SMHIETRTNA-N
Annosquamosin G	3	in silico MS2 and RT prediction with MSFINDER and Retip	307.228	[M+H-H2O]+	8.87	BPTFMXPYKVCKDB-ULONZFNLNA-N
5-Androstene-3b,16b,17a-triol	3	in silico MS2 and RT prediction with MSFINDER and Retip	307.228	[M+H]+	9.92	GUGSXATYPSGVAY-SMHIETRTNA-N
Stearidonic acid	3	in silico MS2 and RT prediction with MSFINDER and Retip	309.243	[M+CH3OH+H]+	11.18	JIWBIWFOSCKQMA-LTKCOYKYSA-N
Sclareol	3	in silico MS2 and RT prediction with MSFINDER and Retip	309.28	[M+H]+	6.43	XVULBTBTFGYVRC-UHFFFAOYNA-N
Ovalitenin A	3	in silico MS2 and RT prediction with MSFINDER and Retip	311.129	[M+CH3OH+H]+	4.07	KEJNXXMRDHDOCO-VQHVLOKHSA-N
12,14-Dihydroxyphytol;(-)-12,14-Dihydroxyphytol	3	in silico MS2 and RT prediction with MSFINDER and Retip	311.295	[M+H-H2O]+	6.34	JMZZBVNSDNHLIV-ZFERPUGGNA-N
(+)-Norushinsunine N-oxide	3	in silico MS2 and RT prediction with MSFINDER and Retip	312.124	[M+H]+	6.59	PQQSHMZUVWGXSV-UHFFFAOYNA-N
Siderochelin C	3	in silico MS2 and RT prediction with MSFINDER and Retip	313.129	[M+ACN+Na]+	4.73	PUARYECATSVDEK-WYVADAIZNA-N
2,2-Dimethyl-8-prenylchromene 6-carboxylic acid	3	in silico MS2 and RT prediction with MSFINDER and Retip	314.182	[M+ACN+H]+	3.43	MCQWYGYDCGLCJD-UHFFFAOYSA-N
Melanin	3	in silico MS2 and RT prediction with MSFINDER and Retip	319.066	[M+H]+	1.97	XUMBMVFBXHLACL-UHFFFAOYSA-N
6,10,14-Trimethyl-2-methylenepentadecanal	3	in silico MS2 and RT prediction with MSFINDER and Retip	319.24	[M+K]+	6.02	PTFJEDBJXCZCDO-UHFFFAOYNA-N
Makaluvamine K	3	in silico MS2 and RT prediction with MSFINDER and Retip	322.151	[M+H]+	10.87	MFJASCFAUMWBMV-UHFFFAOYSA-N
UNPD67008	3	in silico MS2 and RT prediction with MSFINDER and Retip	325.144	[M+NH4]+	4.33	PRFUBIMQTZDEPA-RFQJXOPNNA-N
Alkaloid AQC2	3	in silico MS2 and RT prediction with MSFINDER and Retip	327.177	[M+H]+	8.99	YUPRHHFLOLUPFG-UHFFFAOYNA-N
Sterebin A	3	in silico MS2 and RT prediction with MSFINDER and Retip	328.249	[M+NH4]+	8.49	GUVJPXABQYFWPD-BQYQJAHWNA-N
Morusimic acid D;(-)-Morusimic acid D	3	in silico MS2 and RT prediction with MSFINDER and Retip	330.265	[M+H]+	9	OPRYWCSVGFCHJA-KDYIFSSHNA-N
N,N-dimethyl-Safingol	3	in silico MS2 and RT prediction with MSFINDER and Retip	330.344	[M+H]+	9.15	BYBHBTCYJMUUDZ-YLBUIOQXNA-N
3,3',4,4'-Tetrahydroxy-5,5'-diisopropyl-2,2'-dimethylbiphenyl	3	in silico MS2 and RT prediction with MSFINDER and Retip	331.189	[M+H]+	9.41	BUKCOURGDZTOBF-UHFFFAOYSA-N
Neosaxitoxin	3	in silico MS2 and RT prediction with MSFINDER and Retip	333.168	[M+NH4]+	4.25	PPEKGEBBBBNZKS-HGRQIUPRSA-N
Gibberellin A12;GA12	3	in silico MS2 and RT prediction with MSFINDER and Retip	333.204	[M+H]+	10.24	UJFQJDAESQJXTG-NIILLQMYNA-N
8(R)-Hydroperoxylinoleic acid	3	in silico MS2 and RT prediction with MSFINDER and Retip	335.22	[M+Na]+	9.2	RGJSGXNKRWWCOQ-QMEIEYGNSA-N
Mimopudine	3	in silico MS2 and RT prediction with MSFINDER and Retip	338.147	[M+H]+	9.12	HQLJHXNKEFGFDP-UHFFFAOYNA-N
(-)-Matairesinol	3	in silico MS2 and RT prediction with MSFINDER and Retip	341.141	[M+H-H2O]+	4.07	MATGKVZWFZHCLI-PVRQQBJHNA-N
1-Acetoxy-2-hydroxy-16-heptadecyn-4-one	3	in silico MS2 and RT prediction with MSFINDER and Retip	342.264	[M+NH4]+	10.05	HZHSVQVECJXVRP-UHFFFAOYNA-N
S-Lactoylglutathione	3	in silico MS2 and RT prediction with MSFINDER and Retip	344.091	[M+H-2H2O]+	1.72	VDYDCVUWILIYQF-CSMHCCOUSA-N
N-(7-Mercaptoheptanoyl)threonine phosphate	3	in silico MS2 and RT prediction with MSFINDER and Retip	344.092	[M+H]+	1.25	JBJSVEVEEGOEBZ-MNLQIPBYNA-N
DHBOA-Glc	3	in silico MS2 and RT prediction with MSFINDER and Retip	344.104	[M+H]+	8.63	VUFDXOACUHDTLI-UHFFFAOYNA-N
UNPD97443	3	in silico MS2 and RT prediction with MSFINDER and Retip	344.245	[M+K]+	4.44	CPDOMCRMPUTAIL-UEOVKXSCNA-N
Heptadecanedioic acid	3	in silico MS2 and RT prediction with MSFINDER and Retip	345.204	[M+2Na-H]+	10.52	QCNWZROVPSVEJA-UHFFFAOYSA-N
Broussonetine S;(+)-Broussonetine S	3	in silico MS2 and RT prediction with MSFINDER and Retip	346.26	[M+H-H2O]+	6.51	RLBPSCXQOMYGEN-SXZAJXFZNA-N
Pyrroloquinoline quinone	3	in silico MS2 and RT prediction with MSFINDER and Retip	348.048	[M+NH4]+	1.61	MMXZSJMASHPLLR-UHFFFAOYSA-N
Broussonetine M1;(+)-Broussonetine M1;	3	in silico MS2 and RT prediction with MSFINDER and Retip	348.276	[M+H]+	4.52	RESBTRYGXXYJTJ-ZVLROGMONA-N
Gibberellin A81	3	in silico MS2 and RT prediction with MSFINDER and Retip	349.163	[M+H]+	2.91	BKBYHSYZKIAJDA-UHFFFAOYNA-N
UNPD208158	3	in silico MS2 and RT prediction with MSFINDER and Retip	349.179	[M+ACN+Na]+	8.49	ZLFHAAGHGQBQQN-XDTORHTBNA-N
3b-Allotetrahydrocortisol	3	in silico MS2 and RT prediction with MSFINDER and Retip	349.238	[M+H-H2O]+	8.49	AODPIQQILQLWGS-VSJLKEFSSA-N
Mahanimbinine	3	in silico MS2 and RT prediction with MSFINDER and Retip	350.218	[M+H]+	4.43	ZMSFODUWJLWJOE-UHFFFAOYNA-N
Apigenin 7-sulfate	3	in silico MS2 and RT prediction with MSFINDER and Retip	351.015	[M+H]+	1.24	UQUHXFINOFUDCC-UHFFFAOYSA-N
8(R)-Hydroperoxylinoleic acid	3	in silico MS2 and RT prediction with MSFINDER and Retip	351.195	[M+K]+	9.01	RGJSGXNKRWWCOQ-QMEIEYGNSA-N
Tetrahydrocorticosterone	3	in silico MS2 and RT prediction with MSFINDER and Retip	351.254	[M+H]+	7.84	RHQQHZQUAMFINJ-DSCSGEDNSA-N
Gibberellin A20;GA20	3	in silico MS2 and RT prediction with MSFINDER and Retip	355.156	[M+Na]+	4.83	OXFPYCSNYOFUCH-NYJSUMFWNA-N
(-)-Peduncularine	3	in silico MS2 and RT prediction with MSFINDER and Retip	356.207	[M+ACN+Na]+	2.86	SMPYGFGFKJAEJW-VCSXCCQWNA-N
(+)-Curacin A	3	in silico MS2 and RT prediction with MSFINDER and Retip	356.244	[M+H-H2O]+	10.74	LUEYTMPPCOCKBX-XPGWCXPJNA-N
1,-2-diacyl-sn-glycero-3-phospho-O-[N-(2-hydroxyethyl)glycine]	3	in silico MS2 and RT prediction with MSFINDER and Retip	358.09	[M+H]+	2.76	WMWPQEQHUZXEAB-UEQNJFAPNA-N
4',7-Dihydroxy-2'-methoxy-3'-prenylisoflavan	3	in silico MS2 and RT prediction with MSFINDER and Retip	358.208	[M+NH4]+	3.66	ZEJRFMCOSHZBRD-UHFFFAOYNA-N
Aurantiomide B;(+)-Aurantiomide B	3	in silico MS2 and RT prediction with MSFINDER and Retip	359.171	[M+H]+	4.33	QLECHXLRCYDOPS-WDCZEDIGNA-N
12-Deacetylhyrtial	3	in silico MS2 and RT prediction with MSFINDER and Retip	359.291	[M+H]+	5.35	YJHVGMSCPWBUDS-IBXCPPBSNA-N
3,3',4-Tri-O-methylflavellagic acid	3	in silico MS2 and RT prediction with MSFINDER and Retip	361.053	[M+H]+	1.27	BLICLJSLKJVPKA-UHFFFAOYSA-N
UNPD56958	3	in silico MS2 and RT prediction with MSFINDER and Retip	361.141	[M+CH3OH+H]+	2.63	FQJIXULWQYLBFA-CSEYRULYNA-N
Tricyclodehydroisohumulone	3	in silico MS2 and RT prediction with MSFINDER and Retip	361.199	[M+H]+	8.75	FZQFCXBBPNGZEI-ZDIWIDOKNA-N
(??)-threo-1-(p-Hydroxyphenyl)propylene glycol 4'-glucoside	3	in silico MS2 and RT prediction with MSFINDER and Retip	363.163	[M+CH3OH+H]+	3.66	IVGOVXXPQSIWEF-UHFFFAOYNA-N
1-Acetoxy-2-hydroxy-16-heptadecyn-4-one	3	in silico MS2 and RT prediction with MSFINDER and Retip	363.194	[M+K]+	10.05	HZHSVQVECJXVRP-UHFFFAOYNA-N
2'(R)-Hydroxylanneaquinol	3	in silico MS2 and RT prediction with MSFINDER and Retip	363.29	[M+H]+	11.86	SYEWMKBCQCNFPV-WNIDIZLTNA-N
2'(R)-Hydroxylanneaquinol	3	in silico MS2 and RT prediction with MSFINDER and Retip	363.291	[M+H]+	11.36	SYEWMKBCQCNFPV-WNIDIZLTNA-N
2-Dodecylbenzenesulfonic acid	3	in silico MS2 and RT prediction with MSFINDER and Retip	365.158	[M+K]+	3.6	WBIQQQGBSDOWNP-UHFFFAOYSA-N
Dihydrocortisol	3	in silico MS2 and RT prediction with MSFINDER and Retip	365.236	[M+H]+	8.58	ACSFOIGNUQUIGE-AIPUTVCKSA-N
Sativic acid	3	in silico MS2 and RT prediction with MSFINDER and Retip	366.285	[M+NH4]+	3.71	VJOGZGLNDROOFS-UHFFFAOYNA-N
CPD-8935	3	in silico MS2 and RT prediction with MSFINDER and Retip	370.172	[M+NH4]+	3.67	WGHKJYWENWLOMY-XVNBXDOJSA-N
celafurine	3	in silico MS2 and RT prediction with MSFINDER and Retip	370.208	[M+H]+	1.87	CNJPJUFFFBTCBZ-IBGZPJMESA-N
Mahanimbinine	3	in silico MS2 and RT prediction with MSFINDER and Retip	372.2	[M+Na]+	4.19	ZMSFODUWJLWJOE-UHFFFAOYNA-N
(1S,2R,4R,8S)-p-Menthane-2,8,9-triol 9-glucoside	3	in silico MS2 and RT prediction with MSFINDER and Retip	373.184	[M+Na]+	5.16	KRTKKVIKRTZKGY-UHFFFAOYNA-N
Blumenol C glucoside	3	in silico MS2 and RT prediction with MSFINDER and Retip	373.223	[M+H]+	5.05	NYLNHNDMNOPWAZ-UHFFFAOYNA-N
Chilocorine B	3	in silico MS2 and RT prediction with MSFINDER and Retip	373.256	[M+H-H2O]+	5.28	QLSDOXSAZWDYGQ-UHFFFAOYNA-N
alpha,beta-Dihydroxanthohumol	3	in silico MS2 and RT prediction with MSFINDER and Retip	374.202	[M+NH4]+	2.7	SVTCZHIDEDUTBH-UHFFFAOYSA-N
Prostaglandin F1a	3	in silico MS2 and RT prediction with MSFINDER and Retip	374.29	[M+NH4]+	8.94	DZUXGQBLFALXCR-CDIPTNKSSA-N
D8'-Merulinic acid C	3	in silico MS2 and RT prediction with MSFINDER and Retip	375.286	[M+H]+	3.8	NRSDQEWAMHRTMK-MDZDMXLPSA-N
6''-O-Acetylholocalin	3	in silico MS2 and RT prediction with MSFINDER and Retip	376.104	[M+Na]+	3.24	NIVXKMKLZUXGSY-UHFFFAOYNA-N
Strychnine	3	in silico MS2 and RT prediction with MSFINDER and Retip	376.197	[M+ACN+H]+	1.81	QMGVPVSNSZLJIA-PRHWXUJTNA-N
UNPD35127	3	in silico MS2 and RT prediction with MSFINDER and Retip	379.046	[M+H]+	1.96	HATGBNIMPWNQFS-UHFFFAOYSA-N
pseudaminic acid	3	in silico MS2 and RT prediction with MSFINDER and Retip	379.11	[M+2Na-H]+	1.84	ZJOSXOOPEBJBMC-LJRWBPDUSA-N
4',7-Dihydroxy-2'-methoxy-3'-prenylisoflavan	3	in silico MS2 and RT prediction with MSFINDER and Retip	379.137	[M+K]+	3.66	ZEJRFMCOSHZBRD-UHFFFAOYNA-N
Sorbitan laurate	3	in silico MS2 and RT prediction with MSFINDER and Retip	379.271	[M+CH3OH+H]+	2.15	LWZFANDGMFTDAV-UHFFFAOYNA-N
stryvomitine	3	in silico MS2 and RT prediction with MSFINDER and Retip	380.194	[M+NH4]+	4.64	RJMLTFLKJJQGIP-ALNHGJLXSA-N
Tephcalostan C	3	in silico MS2 and RT prediction with MSFINDER and Retip	381.1	[M+H]+	1.84	CRYRNGYGSBBFAR-UHFFFAOYSA-N
3-(8,11,14-Pentadecatrienyl)phenol	3	in silico MS2 and RT prediction with MSFINDER and Retip	381.28	[M+2ACN+H]+	6.61	JOLVYUIAMRUBRK-AOSYACOCSA-N
Aspergillimide;Asperparaline;Asperparaline A	3	in silico MS2 and RT prediction with MSFINDER and Retip	382.206	[M+Na]+	4.94	RTNMRJRMTGSUAE-MFYQJFMMNA-N
(-)-Phenazinomycin;Phenazinomycin	3	in silico MS2 and RT prediction with MSFINDER and Retip	383.244	[M+H-H2O]+	8.47	APNRZHLOPQFNMR-WOCYEQDSNA-N
Apo-12'-violaxanthal	3	in silico MS2 and RT prediction with MSFINDER and Retip	383.259	[M+H]+	10.59	CAXVJDRXJFKYQP-RXCALXPUNA-N
Apo-12'-violaxanthal	3	in silico MS2 and RT prediction with MSFINDER and Retip	383.259	[M+H]+	10.28	CAXVJDRXJFKYQP-RXCALXPUNA-N
Nanaomycin C	3	in silico MS2 and RT prediction with MSFINDER and Retip	384.159	[M+2ACN+H]+	2.97	VENLWOFOMJQPFA-HGXVMFPFNA-N
Gibberellin A36;GA36	3	in silico MS2 and RT prediction with MSFINDER and Retip	385.167	[M+Na]+	4.01	JZBLVVPDEDCVQA-WUAMTQAGNA-N
C00024622	3	in silico MS2 and RT prediction with MSFINDER and Retip	385.17	[M+NH4]+	5.22	IQUGPRHKZNCHGC-WHJGUBRCNA-N
Piptocarphin A	3	in silico MS2 and RT prediction with MSFINDER and Retip	387.146	[M+H-2H2O]+	5.41	BZQDHZDSIXPDSS-OKRQSNPDNA-N
Passiguatemalin;(-)-Passiguatemalin	3	in silico MS2 and RT prediction with MSFINDER and Retip	388.175	[M+2ACN+H]+	4.19	GVFAYMLCFVOLFT-FICORQPONA-N
CPD-8935	3	in silico MS2 and RT prediction with MSFINDER and Retip	391.102	[M+K]+	3.57	WGHKJYWENWLOMY-XVNBXDOJSA-N
Longithorol E;(+)-Longithorol E	3	in silico MS2 and RT prediction with MSFINDER and Retip	393.262	[M+2ACN+H]+	9.43	PHULLDGGFWVHPH-WNVBHWFWNA-N
(3beta,22E)-26,27-Dinorergosta-5,22-dien-3-ol	3	in silico MS2 and RT prediction with MSFINDER and Retip	393.309	[M+Na]+	8.95	BKWBRNDZAJHCMT-SREVYHEPNA-N
(22E, 24x)-Ergosta-4,6,8,22-tetraen-3-one	3	in silico MS2 and RT prediction with MSFINDER and Retip	393.322	[M+H]+	10.89	PVOXMLZUXQNIHC-BQYQJAHWNA-N
UNPD895	3	in silico MS2 and RT prediction with MSFINDER and Retip	395.068	[M+H]+	1.17	YEIJBEBZRAWFJT-BXSIHQEKNA-N
Pregnacetal	3	in silico MS2 and RT prediction with MSFINDER and Retip	395.278	[M+H]+	10.63	KYGPNWVAMZIKIS-JDYIBBLLNA-N
Laurelliptine	3	in silico MS2 and RT prediction with MSFINDER and Retip	396.186	[M+2ACN+H]+	4.37	HORZNQYQXBFWNZ-UHFFFAOYNA-N
4a-Methylzymosterol	3	in silico MS2 and RT prediction with MSFINDER and Retip	399.359	[M+H]+	10.11	FOUJWBXBKVVHCJ-YIJYGBTNSA-N
Antibiotic 2088A;Pelagiomicin A	3	in silico MS2 and RT prediction with MSFINDER and Retip	400.159	[M+H]+	3.4	SFUOAUKIPVZJLK-AGDOHHJYNA-N
Broussonetine T;(+)-Broussonetine T	3	in silico MS2 and RT prediction with MSFINDER and Retip	400.231	[M+Na]+	5.09	IRZPHQYUBDNBAV-IXKXHMCXNA-N
NPTX 2;NPTX 801E; Nephilatoxin 2; Nephilatoxin 801E	3	in silico MS2 and RT prediction with MSFINDER and Retip	401.263	[M+H]2+	4.88	FCDDOXZNNGKUHJ-GUZXWJHPNA-N
7-Methylrosmanol	3	in silico MS2 and RT prediction with MSFINDER and Retip	402.234	[M+ACN+H]+	3.87	XNPVHIQPSAZTLC-UHFFFAOYNA-N
Aspochalasin J	3	in silico MS2 and RT prediction with MSFINDER and Retip	402.271	[M+H]+	4.15	HXVGXVHKKDWYHZ-SNMAPRQANA-N
cathestatin B	3	in silico MS2 and RT prediction with MSFINDER and Retip	407.189	[M+ACN+H]+	3.87	JAJMETBQBCMJSZ-IGYFNUTDNA-N
Artapetalin A	3	in silico MS2 and RT prediction with MSFINDER and Retip	408.255	[M+ACN+Na]+	10.6	UACVRGSPUQDTJA-AGRJPVHOSA-N
Antibiotic MM4550;MM 4550	3	in silico MS2 and RT prediction with MSFINDER and Retip	409.041	[M+H]+	1.54	OIUMWDNCAIKVGD-HAYQOMOYNA-N
Corchoionol C 9-glucoside	3	in silico MS2 and RT prediction with MSFINDER and Retip	409.175	[M+Na]+	8.83	SWYRVCGNMNAFEK-AATRIKPKNA-N
Orotidylic acid	3	in silico MS2 and RT prediction with MSFINDER and Retip	410.053	[M+ACN+H]+	1.77	KYOBSHFOBAOFBF-XVFCMESISA-N
Xenortide A;(-)-Xenortide A	3	in silico MS2 and RT prediction with MSFINDER and Retip	410.273	[M+H]+	6.19	UAFFXYUNGBKFSK-VVWGFWRPNA-N
UNPD175958	3	in silico MS2 and RT prediction with MSFINDER and Retip	410.348	[M+H]+	10.89	QRYJQLCJIPGQPY-IRYQKZGFNA-N
Ixoside	3	in silico MS2 and RT prediction with MSFINDER and Retip	411.094	[M+Na]+	10.7	AYRQUPRKTDTPEN-LOKXSVISNA-N
Gerronemin E	3	in silico MS2 and RT prediction with MSFINDER and Retip	411.254	[M+H]+	7.39	GRNMSFHYESOOJH-QGXVWARISA-N
Strongylophorin 8	3	in silico MS2 and RT prediction with MSFINDER and Retip	411.254	[M+H-H2O]+	6.76	PRLHXGOJZIVTIS-LUYRUOJKNA-N
CPD0-1763	3	in silico MS2 and RT prediction with MSFINDER and Retip	411.254	[M+K]+	7.56	KRHZSXCZZKOXLQ-UHFFFAOYSA-N
Diacarnoxide B	3	in silico MS2 and RT prediction with MSFINDER and Retip	417.3	[M+Na]+	6.61	VCZNGUOXJKTDBG-ZXULBAAINA-N
Isomitrafoline	3	in silico MS2 and RT prediction with MSFINDER and Retip	418.229	[M+NH4]+	2.95	IXWWTVSMMIIIFZ-BRJSKUEGNA-N
Lagerstroemine	3	in silico MS2 and RT prediction with MSFINDER and Retip	420.221	[M+H-H2O]+	5.92	RYMSMTOEKVDTDB-UHFFFAOYNA-N
Epicorazine A;NSC 287069	3	in silico MS2 and RT prediction with MSFINDER and Retip	421.047	[M+H]+	1.24	RCODXLGTKJXDNC-UHFFFAOYNA-N
4a-Methylzymosterol	3	in silico MS2 and RT prediction with MSFINDER and Retip	421.341	[M+Na]+	10.11	FOUJWBXBKVVHCJ-YIJYGBTNSA-N
calotroprocerone A	3	in silico MS2 and RT prediction with MSFINDER and Retip	421.354	[M+H]+	11.4	JPUAKFAZBBXKGI-CJNQANTPSA-N
4,4'-Diapo-zeta-carotene	3	in silico MS2 and RT prediction with MSFINDER and Retip	422.385	[M+NH4]+	11.87	JJMKRPXUHIPSAW-ZOKJSSERSA-N
6alpha-Angeloyloxy-4alpha-hydroxy-3,4,13,14-tetrahydrokolavenic acid	3	in silico MS2 and RT prediction with MSFINDER and Retip	423.312	[M+H]+	10.42	MQPZZRJJCAGMTC-TWUFJHESNA-N
UNPD88666	3	in silico MS2 and RT prediction with MSFINDER and Retip	425.156	[M+H]+	2.03	FOTLPTROGZIOGT-ZMOXHJSUNA-N
90659107	3	in silico MS2 and RT prediction with MSFINDER and Retip	427.218	[M+H]+	5.27	DNOJISVGBFLJOQ-KEASDZFMSA-N
16beta-Hydroxycardiopetaline	3	in silico MS2 and RT prediction with MSFINDER and Retip	427.25	[M+ACN+Na]+	6.99	UMENVHXIPMXIRD-UHFFFAOYNA-N
(-)-5alpha-(12-Cytisinylmethyl)-6alpha-hydroxylupanine	3	in silico MS2 and RT prediction with MSFINDER and Retip	431.28	[M+H-2H2O]+	8.09	YCYPSQCECLHIAW-RYKSQQDZNA-N
(8Z,13Z,18R,20Z)-Strobilinin	3	in silico MS2 and RT prediction with MSFINDER and Retip	431.28	[M+CH3OH+H]+	5.84	IBYNQQZMPJJRJJ-XHOQTITRNA-N
3a,21-Dihydroxy-5b-pregnane-11,20-dione	3	in silico MS2 and RT prediction with MSFINDER and Retip	431.287	[M+2ACN+H]+	3.71	XWYBFXIUISNTQG-XPYNSANSSA-N
Caesaldekarin e;(+)-Caesaldekarin e	3	in silico MS2 and RT prediction with MSFINDER and Retip	432.238	[M+NH4]+	8.9	VVJWDPJDEOTQOZ-SARBHLLPNA-N
UNPD56518	3	in silico MS2 and RT prediction with MSFINDER and Retip	436.125	[M+Na]+	3.92	SXGPUSACNPUSOU-QLXAYMNRNA-N
Methyl (R)-8-Hydroxy-9-decene-4,6-diynoate glucoside	3	in silico MS2 and RT prediction with MSFINDER and Retip	437.194	[M+2ACN+H]+	9.24	AVPBONMPAMZUKG-UHFFFAOYNA-N
2-Hydroxy-22-methyltetracosanoic acid	3	in silico MS2 and RT prediction with MSFINDER and Retip	437.349	[M+K]+	10.94	IJYLBYZUFMZUOS-UHFFFAOYNA-N
Molybdopterin	3	in silico MS2 and RT prediction with MSFINDER and Retip	437.974	[M+2Na-H]+	1.4	ZGVMVAHEUABQHG-SREVYHEPNA-N
calotroprocerone A	3	in silico MS2 and RT prediction with MSFINDER and Retip	438.379	[M+NH4]+	11.41	JPUAKFAZBBXKGI-CJNQANTPSA-N
(+)-Chebulic acid	3	in silico MS2 and RT prediction with MSFINDER and Retip	439.091	[M+2ACN+H]+	1.4	COZMWVAACFYLBI-UHFFFAOYNA-N
Dendronpholide L;(-)-Dendronpholide L	3	in silico MS2 and RT prediction with MSFINDER and Retip	439.27	[M+H-H2O]+	5.74	LLASBBKHEICHEF-IAJBXFBYNA-N
ent-13S-Hydroxy-14R,15-diacetoxy-1(10)-halimen-18-oic acid	3	in silico MS2 and RT prediction with MSFINDER and Retip	439.27	[M+H]+	6.79	CSEDYVUWKINDQS-SWNWJGCUNA-N
Garcinielliptone FA;(+)-Garcinielliptone FA	3	in silico MS2 and RT prediction with MSFINDER and Retip	440.359	[M+NH4]+	10.08	MTCPKFHUPWTJSP-ILKCVVHLNA-N
Hellebrigenin 3-acetate	3	in silico MS2 and RT prediction with MSFINDER and Retip	441.23	[M+H-H2O]+	5.22	VIOBLZMEZRNYRR-WSASBQDBNA-N
UNPD96770	3	in silico MS2 and RT prediction with MSFINDER and Retip	443.16	[M+NH4]+	2.54	UWNLOPFIHDWHDR-CWIBLATHNA-N
Ascorbyl stearate	3	in silico MS2 and RT prediction with MSFINDER and Retip	443.299	[M+H]+	4.12	LITUBCVUXPBCGA-UHFFFAOYNA-N
Guanosine diphosphate	3	in silico MS2 and RT prediction with MSFINDER and Retip	444.037	[M+H]+	9.28	QGWNDRXFNXRZMB-UUOKFMHZSA-N
Xanthoangelol F;3'-Geranyl-2',4-dihydroxy-4'-methoxychalcone	3	in silico MS2 and RT prediction with MSFINDER and Retip	445.187	[M+K]+	3.61	XBFSDEKOTLYPJU-SXZUIPJJSA-N
Tetrahydrofolic acid	3	in silico MS2 and RT prediction with MSFINDER and Retip	446.188	[M+H]+	1.02	MSTNYGQPCMXVAQ-PXYINDEMSA-N
Aspidospermiose	3	in silico MS2 and RT prediction with MSFINDER and Retip	446.261	[M+NH4]+	4.04	KGEHNJICKPDDOV-ABHSDWHVNA-N
Corticatic acid A	3	in silico MS2 and RT prediction with MSFINDER and Retip	447.323	[M+H-H2O]+	4.28	ACNZSZPAYNDIRJ-SWFYLXDKNA-N
Darutoside	3	in silico MS2 and RT prediction with MSFINDER and Retip	449.291	[M+H-2H2O]+	5.84	QWWPCQGHWWNGET-UHFFFAOYNA-N
Bakkenolide D	3	in silico MS2 and RT prediction with MSFINDER and Retip	450.198	[M+ACN+H]+	3.47	LWHLMCCRIWZBQO-CMDGGOBGNA-N
Glabrescione B;5,7-Dimethoxy-3',4'-diprenyloxyisoflavone	3	in silico MS2 and RT prediction with MSFINDER and Retip	451.216	[M+H]+	4.04	RHXDATRKLOYVTC-UHFFFAOYSA-N
Cytochalasin Opho	3	in silico MS2 and RT prediction with MSFINDER and Retip	452.28	[M+H]+	10.57	UMHVFKLUODBPSC-JUDANRDHNA-N
Ganoderal A	3	in silico MS2 and RT prediction with MSFINDER and Retip	454.375	[M+NH4]+	10.88	RHNFCIPJKSUUES-AWQFTUOYNA-N
Kopsijasmine	3	in silico MS2 and RT prediction with MSFINDER and Retip	458.205	[M+ACN+Na]+	4.72	GRCRTDXUTMTMDD-UHFFFAOYNA-N
O-(17-carboxyheptadecanoyl)carnitine	3	in silico MS2 and RT prediction with MSFINDER and Retip	458.349	[M+H]+	11.02	ULCCGBCYWCYNIC-UHFFFAOYNA-N
Semiplenamide E;(-)-Semiplenamide E	3	in silico MS2 and RT prediction with MSFINDER and Retip	459.356	[M+ACN+Na]+	9.96	HMEVPMUFHLUBFU-OZYIIZIHNA-N
Galasine	3	in silico MS2 and RT prediction with MSFINDER and Retip	460.202	[M+2ACN+H]+	1.06	ICRGIRKQLKQVJZ-UHFFFAOYNA-N
14-Norpseurotin;(-)-14-Norpseurotin	3	in silico MS2 and RT prediction with MSFINDER and Retip	462.108	[M+2Na-H]+	2.72	FCGCMRDADMTJIM-ZWMZUICPNA-N
Antibiotic DC 102;DC 102	3	in silico MS2 and RT prediction with MSFINDER and Retip	462.256	[M+H]+	3.18	MOZKTLDMJSXLBW-FSKJJFGTNA-N
Protophomin	3	in silico MS2 and RT prediction with MSFINDER and Retip	463.289	[M+NH4]+	6.02	NNDRVGKCDJPTHD-MZXHRGIVNA-N
calotroproceryl acetate A	3	in silico MS2 and RT prediction with MSFINDER and Retip	465.38	[M+H]+	11.4	CGQANNYVYZXKJK-WQSRGKGMSA-N
6-Oxocamphor	3	in silico MS2 and RT prediction with MSFINDER and Retip	466.136	[M+2Na-H]+	3.34	DGHHQBMTXTWTJV-BQAIUKQQSA-N
UNPD12711	3	in silico MS2 and RT prediction with MSFINDER and Retip	466.412	[M+H]+	11.87	MBPMCCICMQJUCL-UHFFFAOYSA-N
(+)-Staurosporine;Staurosporine;AM-2282;Antibiotic 230;Antibiotic AM 2282;CGP 39360;Staurosporin;Staurosporine	3	in silico MS2 and RT prediction with MSFINDER and Retip	467.211	[M+H]+	3.18	HKSZLNNOFSGOKW-YQMWWAPPNA-N
Isomitraphylline N-oxide	3	in silico MS2 and RT prediction with MSFINDER and Retip	467.233	[M+2ACN+H]+	4.24	DTEXPPFMGPLSPX-CKQZDEODNA-N
Garciduol C	3	in silico MS2 and RT prediction with MSFINDER and Retip	469.087	[M+H-H2O]+	1.73	HPYVBXILLKDBSO-UHFFFAOYSA-N
Leopersin N	3	in silico MS2 and RT prediction with MSFINDER and Retip	469.242	[M+CH3OH+H]+	4.65	CHGSKJMRTUWQRQ-HQVUBUCUNA-N
UNPD223960	3	in silico MS2 and RT prediction with MSFINDER and Retip	469.281	[M+H-H2O]+	8.87	KMDGCQCDKFMKAD-WORHRAFRSA-N
Neuromedin N (1-4)	3	in silico MS2 and RT prediction with MSFINDER and Retip	469.282	[M+H-2H2O]+	2.87	SKGLAZSLOGYCCA-PEFXOJROSA-N
Codaphniphylline;(+)-Codaphniphylline	3	in silico MS2 and RT prediction with MSFINDER and Retip	470.353	[M+H]+	11.15	REKWVHVBDQXQLB-RHJVSDCTNA-N
5,6-Epoxy-5,6-dihydro-10'-apo-b,y-carotene-3,10'-diol	3	in silico MS2 and RT prediction with MSFINDER and Retip	474.293	[M+ACN+Na]+	2.37	GMQZSQMIENYQEB-AFMCRXATNA-N
alpha-D-Xylopyranosyl-(1->6)-beta-D-glucopyranosyl-(1->4)-D-glucose	3	in silico MS2 and RT prediction with MSFINDER and Retip	475.169	[M+H]+	9.62	BSCUNSVAACYEAI-UHFFFAOYNA-N
calotroproceryl acetate B	3	in silico MS2 and RT prediction with MSFINDER and Retip	482.406	[M+NH4]+	11.4	MMSKHYSDSPMHKQ-WQSRGKGMSA-N
6-O-(4-Methoxybenzoyl)-ajugol;(-)-6-O-(4-Methoxybenzoyl)-ajugol	3	in silico MS2 and RT prediction with MSFINDER and Retip	483.185	[M+H]+	3.18	TYZRNRJFBKBHEC-CTSGNTTINA-N
Munchiwarin	3	in silico MS2 and RT prediction with MSFINDER and Retip	483.249	[M+Na]+	9.83	HBTGYTAWTFVIRO-QKOOUZAANA-N
4,4'-diapolycopene	3	in silico MS2 and RT prediction with MSFINDER and Retip	483.379	[M+2ACN+H]+	11.65	HGWBSMBLLOMJGT-DADBORHESA-N
LysoSM(d18:0)	3	in silico MS2 and RT prediction with MSFINDER and Retip	484.385	[M+NH4]+	10.07	GSEOJHIBPQRSNH-XZOQPEGZSA-N
Bis-N-butyl phthalate	3	in silico MS2 and RT prediction with MSFINDER and Retip	485.214	[M+NH4]+	2.65	GTQXJGMYZPFFKR-UHFFFAOYNA-N
Fomefficinic acid B;(+)-Fomefficinic acid B	3	in silico MS2 and RT prediction with MSFINDER and Retip	485.359	[M+H]+	2.96	DGVHJZPQGFRVEC-JTUHZFRCNA-N
Taxuyunnanine P	3	in silico MS2 and RT prediction with MSFINDER and Retip	487.253	[M+H]+	4.17	LYABGXKDPSCBMO-UEEJEOLKNA-N
UNPD223960	3	in silico MS2 and RT prediction with MSFINDER and Retip	487.291	[M+H]+	8.87	KMDGCQCDKFMKAD-WORHRAFRSA-N
Plakinamine H;(+)-Plakinamine H	3	in silico MS2 and RT prediction with MSFINDER and Retip	487.361	[M+Na]+	11.4	VKUXLFCVHPEFNU-SGSUXEKXNA-N
UNPD225867	3	in silico MS2 and RT prediction with MSFINDER and Retip	488.231	[M+2ACN+H]+	3.67	WTCPFXAMIWMDMP-SFHVURJKSA-N
Cholesterol sulfate	3	in silico MS2 and RT prediction with MSFINDER and Retip	489.305	[M+Na]+	6.91	BHYOQNUELFTYRT-ZMWIUTBPNA-N
Chabrolohydroxybenzoquinone G;(-)-Chabrolohydroxybenzoquinone G	3	in silico MS2 and RT prediction with MSFINDER and Retip	489.316	[M+H]+	5.17	IWXGRDWGOJXZGA-QETKOWGUNA-N
Chenodeoxycholic acid sulfate	3	in silico MS2 and RT prediction with MSFINDER and Retip	490.287	[M+NH4]+	4.2	DPVCTIYTPXYDMQ-HEGLNSLBSA-N
UNPD154518	3	in silico MS2 and RT prediction with MSFINDER and Retip	491.299	[M+K]+	8.27	TWIWKKDPZSBUKF-NPMAHJGQNA-N
Durissimol B	3	in silico MS2 and RT prediction with MSFINDER and Retip	493.411	[M+H]+	11.86	WAHSICHAYKKWOI-NHQGMKOONA-N
8-Methylsulfinyloctyl glucosinolate;Glucohirsutin	3	in silico MS2 and RT prediction with MSFINDER and Retip	494.118	[M+H]+	9.89	GPMDJOOLATZDQL-YXBJVNSWNA-N
Antibiotic FA 2097	3	in silico MS2 and RT prediction with MSFINDER and Retip	495.097	[M+H]+	2.06	XOFUALCAHMHEHU-LCPHSRBWNA-N
Antibiotic JI-20B	3	in silico MS2 and RT prediction with MSFINDER and Retip	496.306	[M+H]+	10.59	WYJSPPYVEJPMJA-DJWUNRQOSA-N
Lucidenic acid A	3	in silico MS2 and RT prediction with MSFINDER and Retip	497.237	[M+K]+	4.13	INIPQDKLXQHEAJ-UHFFFAOYNA-N
UNPD10894	3	in silico MS2 and RT prediction with MSFINDER and Retip	498.141	[M+H]+	2.53	BJXGYGPBNHMYHC-SXTKMDBSNA-N
(22E,24E,24bE)-1alpha,25-dihydroxy-26,27-dimethyl-22,23,24,24a,24b,24c-hexadehydro-24a,24b,24c-trihomovitamin D3 / (22E,24E,24bE)-1alpha,25-dihydroxy-26,27-dimethyl-22,23,24,24a,24b,24c-hexadehydro-24a,24b,24c-trihomocholecalciferol	3	in silico MS2 and RT prediction with MSFINDER and Retip	498.401	[M+NH4]+	10.93	IMIQPAWIJCTKKS-ZRCBEPLUNA-N
N,N'-Bis(gamma-glutamyl)cystine	3	in silico MS2 and RT prediction with MSFINDER and Retip	499.115	[M+H]+	1.17	GOZJYXJJQVGDOJ-UHFFFAOYNA-N
oxytetracycline	3	in silico MS2 and RT prediction with MSFINDER and Retip	499.115	[M+K]+	1.24	IWVCMVBTMGNXQD-PXOLEDIWSA-N
11beta-Acetoxydihydrocedrelone	3	in silico MS2 and RT prediction with MSFINDER and Retip	500.263	[M+NH4]+	4.43	PIWQSPSJNTWMFV-QFASWNBENA-N
UNPD229262	3	in silico MS2 and RT prediction with MSFINDER and Retip	501.232	[M+ACN+H]+	5.74	JTZDDPDEGUVQKP-HOKSWIGBSA-N
(-)-N-Acetylardeemin;5-N-Acetylardeemin;N-Acetylardeemin;N-Acetylardeemine	3	in silico MS2 and RT prediction with MSFINDER and Retip	501.247	[M+CH3OH+H]+	8.17	XTLQWSBGQKPGCF-MCLLNAEVNA-N
UNPD29634	3	in silico MS2 and RT prediction with MSFINDER and Retip	502.375	[M+Na]+	11.01	AFDRVSPGMZYQJQ-XCCQCUOVNA-N
Artonin F	3	in silico MS2 and RT prediction with MSFINDER and Retip	503.214	[M+H]+	3.34	GKWNQOINHKVKOT-UHFFFAOYNA-N
UNPD48091	3	in silico MS2 and RT prediction with MSFINDER and Retip	504.267	[M+H]+	4.27	SAQNYTQFLPVTNJ-VGCGTELDNA-N
BU-4664L;Diazepinomicin;ECO 04601;ECO 4601	3	in silico MS2 and RT prediction with MSFINDER and Retip	504.282	[M+ACN+H]+	5.9	SALVHVNECODMJP-GNUCVDFRSA-N
10,11-Dihydro-12-hydroxynerolidol 3-O-beta-D-2'-acetylglucoside	3	in silico MS2 and RT prediction with MSFINDER and Retip	504.317	[M+NH4]+	8.87	HSLJXOGNOJMDIV-PEUKVIBENA-N
Phomopsichalasin	3	in silico MS2 and RT prediction with MSFINDER and Retip	504.317	[M+H]+	9.06	AEKBQYOSHUYACR-HUBYWGRONA-N
Toonaciliatin D;(+)-Toonaciliatin D	3	in silico MS2 and RT prediction with MSFINDER and Retip	506.282	[M+NH4]+	3.38	UFZHJXOBYWWVDW-JFZQRYCFNA-N
Mortonin D;(3alpha,4beta,6alpha,6abeta,7beta,10alpha,10aalpha)-10-Tetramethyl-6,7-bis(benzoyloxy)octahydro-10-hydroxy-3,4,6a 3H-3,10a-epoxy-1H-2-benzoxocin-1-one	3	in silico MS2 and RT prediction with MSFINDER and Retip	509.217	[M+H]+	5.24	QCNPTNUSTXYOQU-UHFFFAOYNA-N
Swiemahogin A;(-)-Swiemahogin A	3	in silico MS2 and RT prediction with MSFINDER and Retip	511.237	[M+Na]+	3.38	AXPQVXURTHIQGM-IZQLNBHXNA-N
Aspidospermiose	3	in silico MS2 and RT prediction with MSFINDER and Retip	511.288	[M+2ACN+H]+	9.52	KGEHNJICKPDDOV-ABHSDWHVNA-N
Leukotriene D4	3	in silico MS2 and RT prediction with MSFINDER and Retip	514.302	[M+NH4]+	6.56	YEESKJGWJFYOOK-LDDGIIIKSA-N
Strongylodiol J;(-)-Strongylodiol J	3	in silico MS2 and RT prediction with MSFINDER and Retip	514.361	[M+ACN+Na]+	8.83	WDXFLISWHBNITQ-VOZOHOFYNA-N
UNPD150132	3	in silico MS2 and RT prediction with MSFINDER and Retip	515.357	[M+H]+	8.15	GZQQFTZVNJUIRB-HFJLINJUNA-N
Durissimol B	3	in silico MS2 and RT prediction with MSFINDER and Retip	515.393	[M+Na]+	11.86	WAHSICHAYKKWOI-NHQGMKOONA-N
8-Methylsulfinyloctyl glucosinolate;Glucohirsutin	3	in silico MS2 and RT prediction with MSFINDER and Retip	516.1	[M+Na]+	9.89	GPMDJOOLATZDQL-YXBJVNSWNA-N
UNPD149896	3	in silico MS2 and RT prediction with MSFINDER and Retip	517.354	[M+NH4]+	10.36	YPCYHGCGCHKNGL-HZOPQAAPNA-N
Mycalamide B	3	in silico MS2 and RT prediction with MSFINDER and Retip	518.3	[M+H]+	9.39	AAABMNXUOFPYQK-WMBKCNCTSA-N
alpha-Ionol O-[arabinosyl-(1->6)-glucoside]	3	in silico MS2 and RT prediction with MSFINDER and Retip	521.293	[M+CH3OH+H]+	6.02	MITNBWXSDQNKSU-BQYQJAHWNA-N
Tricalysioside T;(-)-Tricalysioside T	3	in silico MS2 and RT prediction with MSFINDER and Retip	523.289	[M+Na]+	5.62	IKBFZZPRIOQBPZ-AOHHEPDGNA-N
UNPD16199	3	in silico MS2 and RT prediction with MSFINDER and Retip	523.289	[M+ACN+Na]+	5.49	QRWPHMHMPOYWGH-JGQGEKGANA-N
10,11-Dihydro-12-hydroxynerolidol 3-O-beta-D-2'-acetylglucoside	3	in silico MS2 and RT prediction with MSFINDER and Retip	525.247	[M+K]+	8.86	HSLJXOGNOJMDIV-PEUKVIBENA-N
15b beta-Hydroxy-N-acetylardeemine	3	in silico MS2 and RT prediction with MSFINDER and Retip	526.251	[M+ACN+H]+	4.07	UTVHCNQHDCRVMF-RGVWNYFINA-N
UNPD139153	3	in silico MS2 and RT prediction with MSFINDER and Retip	526.432	[M+H]+	11.26	HXFWYUHXECJSGF-GUZXWJHPNA-N
UNPD120072	3	in silico MS2 and RT prediction with MSFINDER and Retip	526.432	[M+NH4]+	11.39	ZMXFMMGMCXCUSR-UHMAFGNNNA-N
Viscutin 1	3	in silico MS2 and RT prediction with MSFINDER and Retip	527.16	[M+H]+	1.33	TXPZFODNQVHXLF-SLBHPWMWNA-N
Myricatomentoside I	3	in silico MS2 and RT prediction with MSFINDER and Retip	527.189	[M+Na]+	3.45	RALVCBWUWHJOGL-UHFFFAOYNA-N
Chlamydocin	3	in silico MS2 and RT prediction with MSFINDER and Retip	527.288	[M+H]+	3.01	SGYJGGKDGBXCNY-OMXZULOZNA-N
Officinoside C;(-)-Officinoside C	3	in silico MS2 and RT prediction with MSFINDER and Retip	529.302	[M+H-H2O]+	3.07	OFIPMYQXNOJVMT-QNXZGNTKNA-N
Cytochalasin Ppho	3	in silico MS2 and RT prediction with MSFINDER and Retip	529.336	[M+NH4]+	6.43	AVASIWUXPVFFGK-WISUYLHINA-N
UNPD156820	3	in silico MS2 and RT prediction with MSFINDER and Retip	530.13	[M+ACN+H]+	1.8	WLUANEBAAWEMAJ-AYBUCJKNNA-N
Integristerone B	3	in silico MS2 and RT prediction with MSFINDER and Retip	530.333	[M+NH4]+	7.52	NVWOXHIJJRKUQA-KIAWZAOVNA-N
UNPD25994	3	in silico MS2 and RT prediction with MSFINDER and Retip	531.206	[M+ACN+H]+	4.07	XTBGPZOHAWGAEB-FNCQTZNRSA-N
Avicennamine;(-)-Avicennamine	3	in silico MS2 and RT prediction with MSFINDER and Retip	531.352	[M+Na]+	6.31	HWNLAGBDXKGMAH-KNIGOARZNA-N
UNPD120072	3	in silico MS2 and RT prediction with MSFINDER and Retip	531.388	[M+Na]+	11.39	ZMXFMMGMCXCUSR-UHMAFGNNNA-N
UNPD120072	3	in silico MS2 and RT prediction with MSFINDER and Retip	531.388	[M+Na]+	11.26	ZMXFMMGMCXCUSR-UHMAFGNNNA-N
Zygadenine	3	in silico MS2 and RT prediction with MSFINDER and Retip	532.261	[M+K]+	2.19	NPNDUIMQBJIGQS-PWYRXMOWNA-N
UNPD138222	3	in silico MS2 and RT prediction with MSFINDER and Retip	533.26	[M+CH3OH+H]+	5.87	XFNAMDRYBAWYQR-FVOYFJRUNA-N
Leptofuranin C	3	in silico MS2 and RT prediction with MSFINDER and Retip	533.331	[M+Na]+	7.17	WEMVPZVMDSGXDU-YGIRKTDUNA-N
Karatavigenin B	3	in silico MS2 and RT prediction with MSFINDER and Retip	533.332	[M+H-2H2O]+	7	HBGXWELPRPGLBB-DYMIFXPONA-N
Ajugalactone	3	in silico MS2 and RT prediction with MSFINDER and Retip	534.313	[M+NH4]+	4.34	LLPOMLNTBDOEOC-LPZASMAENA-N
Melissoidesin D;(-)-Melissoidesin D	3	in silico MS2 and RT prediction with MSFINDER and Retip	535.233	[M+K]+	6.76	DTXLHTNLCVLTBV-WKVJHDRJNA-N
UNPD64428	3	in silico MS2 and RT prediction with MSFINDER and Retip	535.233	[M+NH4]+	5.93	SLQXAOUIYWRQCB-OCYVSAHVNA-N
UNPD212391	3	in silico MS2 and RT prediction with MSFINDER and Retip	535.233	[M+2ACN+H]+	5.26	HYGFKCQBHAUYFT-UHFFFAOYSA-N
Eleganoside B	3	in silico MS2 and RT prediction with MSFINDER and Retip	535.277	[M+H]+	4.57	BJJIXMQSMBBRTG-FKNSVFJLNA-N
Nb-Tricosanoyltryptamine	3	in silico MS2 and RT prediction with MSFINDER and Retip	535.402	[M+K]+	11.62	XJUYJAIYKWBPLY-UHFFFAOYSA-N
Pachyclavulide I;(-)-Pachyclavulide I	3	in silico MS2 and RT prediction with MSFINDER and Retip	537.232	[M+H]+	4.06	BPTNOPJYGTTXJM-RWPSLRGDNA-N
Capsianoside V	3	in silico MS2 and RT prediction with MSFINDER and Retip	537.268	[M+Na]+	5.47	XQQKZIVFXGPJHN-KMRBWUSPNA-N
Spirotryprostatin C;(-)-Spirotryprostatin C	3	in silico MS2 and RT prediction with MSFINDER and Retip	537.268	[M+ACN+H]+	5.35	YPSDDVCGIHETLQ-WQTWIUDHNA-N
Epothilone B10;(-)-Epothilone B10	3	in silico MS2 and RT prediction with MSFINDER and Retip	539.321	[M+NH4]+	10.49	FBHLXXMDOGRQOQ-NYRRVEJINA-N
UNPD222907	3	in silico MS2 and RT prediction with MSFINDER and Retip	540.191	[M+NH4]+	4.19	BFKZNQFDZXADLI-JPZURHSJSA-N
Holarosine A	3	in silico MS2 and RT prediction with MSFINDER and Retip	540.332	[M+Na]+	4.84	QLCJXHUAXDJDFZ-RYOMDWOCNA-N
PC(O-17:0/0:0)	3	in silico MS2 and RT prediction with MSFINDER and Retip	540.333	[M+2Na-H]+	10.59	HQRBTQCLRRUGMR-KSYWNVGFNA-N
Gibberellin A37 glucosyl ester	3	in silico MS2 and RT prediction with MSFINDER and Retip	541.263	[M+CH3OH+H]+	4.27	BQKJRWQLMRWZET-UHFFFAOYNA-N
UNPD11340	3	in silico MS2 and RT prediction with MSFINDER and Retip	541.421	[M+H]+	11.98	MUBMXDWHZHJXAI-YXXUJZBTNA-N
9-Hydroxy-10-epi-ryanodine;9alpha-Hydroxy-10-epiryanodine	3	in silico MS2 and RT prediction with MSFINDER and Retip	542.262	[M+CH3OH+H]+	2.27	REYPEWVSBJSDJC-OFOHABJSNA-N
UNPD160233	3	in silico MS2 and RT prediction with MSFINDER and Retip	542.427	[M+NH4]+	10.91	BGGXREMBPKLZCX-SNILWYMCNA-N
Euphornin A	3	in silico MS2 and RT prediction with MSFINDER and Retip	543.303	[M+H]+	4.21	GAQMOGICQDOKHD-ISSFDRLWNA-N
Belladonnine	3	in silico MS2 and RT prediction with MSFINDER and Retip	543.328	[M+H]+	6.62	GERIGMSHTUAXSI-VSFMPYMYNA-N
Scoparasin B;(-)-Scoparasin B	3	in silico MS2 and RT prediction with MSFINDER and Retip	544.259	[M+H]+	5.55	YXSYADYLBHSOLA-MWOLTELDNA-N
UNPD193766	3	in silico MS2 and RT prediction with MSFINDER and Retip	544.36	[M+H]+	7.99	YYOVEXZGHBXNOO-RDWUTEQRNA-N
UNPD108119	3	in silico MS2 and RT prediction with MSFINDER and Retip	545.199	[M+NH4]+	3.52	IXYCWCGUQZJPJG-UHFFFAOYSA-N
Alfileramine	3	in silico MS2 and RT prediction with MSFINDER and Retip	545.385	[M+2ACN+H]+	11.02	GKQFYWMPBGPDAW-ZESYGTMMNA-N
CPD-9573	3	in silico MS2 and RT prediction with MSFINDER and Retip	547.201	[M+2ACN+H]+	3.96	PPKYVFHFFAMMLR-NDXMBDNFSA-L
UNPD120072	3	in silico MS2 and RT prediction with MSFINDER and Retip	547.363	[M+K]+	11.39	ZMXFMMGMCXCUSR-UHMAFGNNNA-N
[(2R,3R,4S,6R)-2-[[(2R,3R,7R,8S,9S,10R,12R,14E)-3-ethyl-7-hydroxy-10-(2-hydroxyethyl)-5,13-diketo-2,8,12,16-tetramethyl-4,17-dioxabicyclo[14.1.0]heptadec-14-en-9-yl]oxy]-3-hydroxy-6-methyl-tetrahydropyran-4-yl]-dimethyl-ammonium	3	in silico MS2 and RT prediction with MSFINDER and Retip	548.364	[M+H-2H2O]+	4.89	GRMXJKDVOPKCDG-PJIGYSDQSA-O
Rostratamine	3	in silico MS2 and RT prediction with MSFINDER and Retip	549.256	[M+ACN+Na]+	4.24	GQDQWQRPCUUAFD-ORIVAHKZNA-N
Antibiotic VM 44866;VM 44866	3	in silico MS2 and RT prediction with MSFINDER and Retip	549.326	[M+H-2H2O]+	6.21	HSLQALAXKYULNJ-KYTHOXCKNA-N
Cholesterol sulfate	3	in silico MS2 and RT prediction with MSFINDER and Retip	549.376	[M+2ACN+H]+	5.51	BHYOQNUELFTYRT-ZMWIUTBPNA-N
Calactin	3	in silico MS2 and RT prediction with MSFINDER and Retip	550.308	[M+NH4]+	3.56	OWPWFVVPBYFKBG-IYFKSFNBNA-N
Cuniloside	3	in silico MS2 and RT prediction with MSFINDER and Retip	551.23	[M+K]+	5.42	JOLLIDAUJSAZHE-XFJFLBFJNA-N
(-)-N-Acetylardeemin;5-N-Acetylardeemin;N-Acetylardeemin;N-Acetylardeemine	3	in silico MS2 and RT prediction with MSFINDER and Retip	551.283	[M+2ACN+H]+	8.17	XTLQWSBGQKPGCF-MCLLNAEVNA-N
(-)-N-Acetylardeemin;5-N-Acetylardeemin;N-Acetylardeemin;N-Acetylardeemine	3	in silico MS2 and RT prediction with MSFINDER and Retip	551.285	[M+2ACN+H]+	5.29	XTLQWSBGQKPGCF-MCLLNAEVNA-N
A 108836	3	in silico MS2 and RT prediction with MSFINDER and Retip	551.347	[M+H]+	11.06	WUTCIYAEVCFZHD-KEZWBAQRNA-N
Bipindogulomethyloside	3	in silico MS2 and RT prediction with MSFINDER and Retip	553.3	[M+H]+	8.45	WRORFDCUNLGVJF-UHFFFAOYNA-N
alpha-Cryptoxanthin	3	in silico MS2 and RT prediction with MSFINDER and Retip	553.433	[M+H]+	11.39	NBZANZVJRKXVBH-LCXCOPDVNA-N
UNPD180043	3	in silico MS2 and RT prediction with MSFINDER and Retip	554.264	[M+H]+	5.8	XGBWRXIJOYLKPR-NMAAWGNGNA-N
Trichoverrin A;[4beta(2Z,4E,6S,7S),15(E)]-4-(6,7-Dihydroxy-2,4-octadienoate) 15-(5-hydroxy-3-methyl-2-pentenoate) 12,13-epoxy-trichothec-9-ene-4,15-diol	3	in silico MS2 and RT prediction with MSFINDER and Retip	555.264	[M+Na]+	3.56	SYKUAMFXVHJZSH-VQHWAHFCNA-N
Hyuganoside III	3	in silico MS2 and RT prediction with MSFINDER and Retip	556.24	[M+NH4]+	4.08	KMRNHQMTDWXUBS-DFVKVYAVNA-N
Salvianolic acid K	3	in silico MS2 and RT prediction with MSFINDER and Retip	557.12	[M+H]+	1.3	AZOCLKLJIKZOLF-KTLDLXQWNA-N
UNPD56166	3	in silico MS2 and RT prediction with MSFINDER and Retip	558.297	[M+H]+	9.82	LPQGAEUEHFMJIW-YMRXVXHWNA-N
UNPD146248	3	in silico MS2 and RT prediction with MSFINDER and Retip	558.405	[M+CH3OH+H]+	11.27	SLWLCNAVVKPOAH-PWDGOUDUNA-N
Alpha-Carotene	3	in silico MS2 and RT prediction with MSFINDER and Retip	559.42	[M+Na]+	11.85	ANVAOWXLWRTKGA-JLTXGRSLNA-N
Xylogranatin C	3	in silico MS2 and RT prediction with MSFINDER and Retip	560.255	[M+NH4]+	5.46	OZYCYLSFCHKMLB-MERNIEDZNA-N
Euphornin A	3	in silico MS2 and RT prediction with MSFINDER and Retip	560.329	[M+NH4]+	4.2	GAQMOGICQDOKHD-ISSFDRLWNA-N
5,7-Dihydroxy-3',4'-dimethoxy-8-(3-hydroxy-3-methylbutyl)-isoflavone 7-glucoside	3	in silico MS2 and RT prediction with MSFINDER and Retip	563.214	[M+H]+	4.01	AQOVBCDOFOOETK-QERVRDGFNA-N
Caseamembrin C;(+)-Caseamembrin C	3	in silico MS2 and RT prediction with MSFINDER and Retip	563.321	[M+H]+	8.4	BOVQULZBTRBINP-ZSURLNEPNA-N
8-Hydroxymanzamine A	3	in silico MS2 and RT prediction with MSFINDER and Retip	565.355	[M+H]+	10.35	AMSNINGPDSUBHZ-XJFSWMRFNA-N
UNPD148683	3	in silico MS2 and RT prediction with MSFINDER and Retip	566.035	[M+K]+	10.42	ACPLOCGAXUGQHB-CDSIGGHENA-N
Serratane-3alpha,14alpha,15alpha,20beta,21beta,24,29-Heptol;(-)-Serratane-3alpha,14alpha,15alpha,20beta,21beta,24,29-Heptol	3	in silico MS2 and RT prediction with MSFINDER and Retip	566.402	[M+ACN+H]+	10.64	OQJDVIOLWZVSDV-KPXRRHTBNA-N
pseudolaric acid A O-beta-D-glucopyranoside	3	in silico MS2 and RT prediction with MSFINDER and Retip	568.276	[M+NH4]+	4.51	IVYWRYGMQNKDQB-MLDSOEAKNA-N
UNPD82006	3	in silico MS2 and RT prediction with MSFINDER and Retip	569.315	[M+Na]+	4.39	BJEGXUXAAHPJOD-GLJZWXLLNA-N
6'-N-Methylbutirosin A	3	in silico MS2 and RT prediction with MSFINDER and Retip	570.293	[M+H]+	4.61	DZPLRNCXAQPJSJ-DJQWAUSQNA-N
PC(O-20:0/0:0)	3	in silico MS2 and RT prediction with MSFINDER and Retip	570.447	[M+CH3OH+H]+	12.16	GZGHIJOEOOMFMM-DKKPLQGMNA-N
Plakoridine A	3	in silico MS2 and RT prediction with MSFINDER and Retip	572.438	[M+H]+	10.05	ULFKEEJTLUNSEY-UTTGQTJXNA-N
UNPD134478	3	in silico MS2 and RT prediction with MSFINDER and Retip	573.197	[M+NH4]+	4.84	LNTGQFREGXHRAN-UCMKVZFZNA-N
Kadsurarin;Kadsurarin II	3	in silico MS2 and RT prediction with MSFINDER and Retip	573.234	[M+H]+	4.58	DHEFJFKRWXSOLG-GXDHUFHONA-N
UNPD89262	3	in silico MS2 and RT prediction with MSFINDER and Retip	575.323	[M+K]+	7.89	WKCHWHAYABLGGH-NOEDMIOANA-N
Mesobilirubinogen	3	in silico MS2 and RT prediction with MSFINDER and Retip	575.323	[M+H-H2O]+	7.39	OBHRVMZSZIDDEK-UHFFFAOYNA-N
Rubixanthin	3	in silico MS2 and RT prediction with MSFINDER and Retip	575.414	[M+Na]+	11.39	ABTRFGSPYXCGMR-KZLGKGLPNA-N
epoxomicin	3	in silico MS2 and RT prediction with MSFINDER and Retip	577.356	[M+Na]+	7.23	DOGIDQKFVLKMLQ-FOIHFKJPNA-N
Fucalpha1-2Galalpha1-3Galbeta1-4Glcbeta-Cer(d18:1/16:0)	3	in silico MS2 and RT prediction with MSFINDER and Retip	577.369	[M+H]2+	5.4	VGTSDXWPYPPYSM-YVEJXIANNA-N
UNPD172430	3	in silico MS2 and RT prediction with MSFINDER and Retip	580.419	[M+H]2+	11.11	NLGBWFHSHJPDQX-VHGUHMPKNA-N
Hydrangenoside E	3	in silico MS2 and RT prediction with MSFINDER and Retip	581.259	[M+H]+	4.2	SYCAAOWPYJBQKF-UHFFFAOYNA-N
Quivisianthone	3	in silico MS2 and RT prediction with MSFINDER and Retip	583.292	[M+H]+	6.26	ZNCUKAYDXAEZCT-MUMFWNDXNA-N
UNPD230463	3	in silico MS2 and RT prediction with MSFINDER and Retip	584.308	[M+H]+	8.11	FMTSMPFFBGSQIV-UHTWUFFWSA-N
UNPD127272	3	in silico MS2 and RT prediction with MSFINDER and Retip	584.36	[M+2ACN+H]+	10.59	XWFDVJNZERXRSB-ORXWZTGANA-N
[(2R,3R,4S,6R)-2-[[(2R,3R,7R,8S,9S,10R,12R,14E)-3-ethyl-7-hydroxy-10-(2-hydroxyethyl)-5,13-diketo-2,8,12,16-tetramethyl-4,17-dioxabicyclo[14.1.0]heptadec-14-en-9-yl]oxy]-3-hydroxy-6-methyl-tetrahydropyran-4-yl]-dimethyl-ammonium	3	in silico MS2 and RT prediction with MSFINDER and Retip	584.383	[M+H]+	5.67	GRMXJKDVOPKCDG-PJIGYSDQSA-O
Euphornin	3	in silico MS2 and RT prediction with MSFINDER and Retip	585.307	[M+H]+	6.49	BRVXVMOWTHQKHC-LVYIKVSWNA-N
Citrusin B	3	in silico MS2 and RT prediction with MSFINDER and Retip	586.251	[M+NH4]+	4.36	XMGKCJUCYBLMBY-PLNGDYQANA-N
Officinoside C;(-)-Officinoside C	3	in silico MS2 and RT prediction with MSFINDER and Retip	588.339	[M+ACN+H]+	6.1	OFIPMYQXNOJVMT-QNXZGNTKNA-N
FO 2546F;Terpendole L	3	in silico MS2 and RT prediction with MSFINDER and Retip	588.367	[M+H]+	8.66	LLRYILBJBZFIRA-RJJNKRGWNA-N
Taxayuntin B	3	in silico MS2 and RT prediction with MSFINDER and Retip	589.264	[M+H]+	8.1	OGAJKHIMOFQOPT-MOJRTSEJNA-N
Theopederin J;(+)-Theopederin J	3	in silico MS2 and RT prediction with MSFINDER and Retip	590.337	[M+H-2H2O]+	6.19	SDDFXIKNCCXKIS-UWOUXUDANA-N
IC202A	3	in silico MS2 and RT prediction with MSFINDER and Retip	590.427	[M+NH4]+	10.99	BVRULQCEMCYBAM-UHFFFAOYSA-N
Citrusin B	3	in silico MS2 and RT prediction with MSFINDER and Retip	591.206	[M+Na]+	4.36	XMGKCJUCYBLMBY-PLNGDYQANA-N
16alpha-Acetoxycalactin	3	in silico MS2 and RT prediction with MSFINDER and Retip	591.28	[M+H]+	6.31	BMPDNBQADRWROC-YAZUEEJJNA-N
UNPD177088	3	in silico MS2 and RT prediction with MSFINDER and Retip	591.446	[M+CH3OH+H]+	12.62	ZMKUJYRGSVMFAC-LXRQWOPTNA-N
UNPD88696	3	in silico MS2 and RT prediction with MSFINDER and Retip	592.269	[M+H]+	11.45	QDJNMAHTJHYJNV-GNXGSAPJNA-N
UNPD67936	3	in silico MS2 and RT prediction with MSFINDER and Retip	592.374	[M+NH4]+	5.19	HXRGVCPDQHZDJX-QBYDMDFHNA-N
Cephalosporin P1	3	in silico MS2 and RT prediction with MSFINDER and Retip	592.39	[M+NH4]+	4.99	YJJWILCYIMMPAS-XFYKWXKONA-N
Ganoderic acid Mk	3	in silico MS2 and RT prediction with MSFINDER and Retip	593.351	[M+Na]+	6.28	BCZACVDBVIYNMZ-VXLYETTFNA-N
UNPD211193	3	in silico MS2 and RT prediction with MSFINDER and Retip	594.167	[M+CH3OH+H]+	1.54	YLCLZIFGUMUJJO-JQGDQXFPSA-N
7,8-Dehydroastaxanthianthin	3	in silico MS2 and RT prediction with MSFINDER and Retip	595.373	[M+H]+	11.05	BZQRJBLJDFPOBX-FOERLQQGNA-N
Madhucic acid	3	in silico MS2 and RT prediction with MSFINDER and Retip	597.459	[M+H]+	11.37	JKDKWICYSPHZGM-MNGPTGSQNA-N
Tinosineside A	3	in silico MS2 and RT prediction with MSFINDER and Retip	598.251	[M+ACN+H]+	4.82	GADVYUZLGRAFKB-FCQHHSGBNA-N
UNPD17394	3	in silico MS2 and RT prediction with MSFINDER and Retip	598.49	[M+NH4]+	11.84	YFXWGJQZBWQDHN-HCHGGISLNA-N
Cussoracoside F;(-)-Cussoracoside F	3	in silico MS2 and RT prediction with MSFINDER and Retip	599.342	[M+H]+	7.64	VYFWQMKVBRGECE-BBBGBDLHNA-N
Ejap 7;[3R-(3alpha,5beta,5aalpha,6alpha,9alpha,9aalpha,10R*)]-6,10-bis(Acetyloxy)-5a-[(acetyloxy)methyl]octahydro-2,2,9-trimethyl-2H-3,9a-methano-1-benzoxepin-5-yl ester 3-pyridinecarboxylic acid	3	in silico MS2 and RT prediction with MSFINDER and Retip	600.285	[M+2ACN+H]+	5.91	UJALGRQWOWADFX-UHFFFAOYNA-N
CPD-7424	3	in silico MS2 and RT prediction with MSFINDER and Retip	601.423	[M+H]+	10	PGYAYSRVSAJXTE-OQASCVKESA-N
Ouabain	3	in silico MS2 and RT prediction with MSFINDER and Retip	602.318	[M+NH4]+	6.49	LPMXVESGRSUGHW-HBYQJFLCSA-N
3-O-acetylecdysone 2-phosphate	3	in silico MS2 and RT prediction with MSFINDER and Retip	604.335	[M+NH4]+	6.14	MYOZIWALDKJCBG-KXCOSXAXSA-N
UNPD51389	3	in silico MS2 and RT prediction with MSFINDER and Retip	604.335	[M+NH4]+	6.66	UEGSTWRRIJQNQF-XCUQCEHVNA-N
Presqualene diphosphate	3	in silico MS2 and RT prediction with MSFINDER and Retip	604.355	[M+NH4]+	4.33	ATZKAUGGNMSCCY-VYCBRMPGSA-N
Fomitopsin A;(+)-Fomitopsin A	3	in silico MS2 and RT prediction with MSFINDER and Retip	604.392	[M+NH4]+	5.78	SBQVJLOKEGLUHV-TYRRJVDONA-N
Viridominic acid A	3	in silico MS2 and RT prediction with MSFINDER and Retip	606.371	[M+NH4]+	5.02	RYSOWAXDKQQGFZ-PQFKBGJRNA-N
Methyl pheophorbide a	3	in silico MS2 and RT prediction with MSFINDER and Retip	607.292	[M+H]+	11.77	IWKYEJKHXKRZIJ-PIEZJCHHNA-N
Scupontin B;(-)-Scupontin B	3	in silico MS2 and RT prediction with MSFINDER and Retip	607.309	[M+H]+	2.73	LSEZGUSNRPXEKV-CKKZYBLGNA-N
Favolon	3	in silico MS2 and RT prediction with MSFINDER and Retip	608.386	[M+NH4]+	4.51	SDVHFMSSWIIGCL-CFCCTYEHNA-N
Ganoderic acid AP2;(+)-Ganoderic acid AP2	3	in silico MS2 and RT prediction with MSFINDER and Retip	609.347	[M+Na]+	5.78	QLPXRZYNNFETED-NBCZPYCZNA-N
Culicinin C	3	in silico MS2 and RT prediction with MSFINDER and Retip	610.429	[M+H]2+	10.6	IIKPZFDORRGEBZ-PSDSMJMTNA-N
UNPD187882	3	in silico MS2 and RT prediction with MSFINDER and Retip	611.305	[M+Na]+	6.36	IHWWWNHKYBLZGD-NCCFSBQINA-N
Oxidized glutathione	3	in silico MS2 and RT prediction with MSFINDER and Retip	613.16	[M+H]+	1.88	YPZRWBKMTBYPTK-UHFFFAOYNA-N
Oxidized glutathione	3	in silico MS2 and RT prediction with MSFINDER and Retip	613.16	[M+H]+	1.03	YPZRWBKMTBYPTK-UHFFFAOYNA-N
Cimilactone A;(-)-Cimilactone A	3	in silico MS2 and RT prediction with MSFINDER and Retip	613.342	[M+Na]+	4.51	RKTWPXXLEHCPIO-YEBZOTOENA-N
4'-Deoxycirramycin A1;Antibiotic 67-694;Antibiotic M 4365A2;Antibiotic T 1124C;Juvenimicin A3;M 4365A2;NSC 175150;Rosamicin;Rosaramicin;Sch 14947	3	in silico MS2 and RT prediction with MSFINDER and Retip	614.399	[M+CH3OH+H]+	11.52	IUPCWCLVECYZRV-ZRDIBKRKNA-N
Spirilloxanthin;Rhodoviolascin;3,3',4,4'-Tetradehydro-1,1',2,2'-tetrahydro-1,1'-dimethoxy-psi,psi-carotene	3	in silico MS2 and RT prediction with MSFINDER and Retip	614.485	[M+NH4]+	11.24	VAZQBTJCYODOSV-HZUCFJANSA-N
chlorophyllide a	3	in silico MS2 and RT prediction with MSFINDER and Retip	615.26	[M+Na]+	11.45	AXNGBNDQHOVSCG-UHFFFAOYNA-L
Chrymutasin A;D 329P;Hayumicin C2	3	in silico MS2 and RT prediction with MSFINDER and Retip	616.179	[M+H-2H2O]+	7.74	JRLWNUGRLOAQEN-OXIKRAQONA-N
Foliachinenoside C;(-)-Foliachinenoside C	3	in silico MS2 and RT prediction with MSFINDER and Retip	616.261	[M+NH4]+	4.01	JNTVMSUGCQQJNZ-HTKZOBOCNA-N
Hericenone G	3	in silico MS2 and RT prediction with MSFINDER and Retip	616.464	[M+NH4]+	8.48	GGXBOOLRGQUWIV-UHFFFAOYNA-N
6-Desacetylscilliroside;(-)-6-Desacetylscilliroside	3	in silico MS2 and RT prediction with MSFINDER and Retip	617.236	[M+K]+	3.25	XLCCXBCMWUOBIG-SIHFBMQNNA-N
UNPD87937	3	in silico MS2 and RT prediction with MSFINDER and Retip	618.298	[M+H-2H2O]+	5.81	UIRHEISCQHAHSY-JKEPSLPNNA-N
Spiroidesin;(-)-Spiroidesin	3	in silico MS2 and RT prediction with MSFINDER and Retip	618.313	[M+H]+	5.93	XFLVJFHNXBWJDL-NCRUWMDKNA-N
Latoxanthin;(3S,3'S,5R,5'R,6R,6'S)-5,6-Epoxy-5,5',6,6'-tetrahydro-3,3',5',6'-tetrahydroxy-beta,beta-carotene	3	in silico MS2 and RT prediction with MSFINDER and Retip	619.441	[M+H]+	11.23	IHFACKVTKFGBBA-YFUVOBOANA-N
19-Oxofasciospongine A	3	in silico MS2 and RT prediction with MSFINDER and Retip	620.265	[M+2Na-H]+	11.37	KYSKWYJBCHWKSD-JZZJHQMXNA-N
PE(P-16:0/12:0)	3	in silico MS2 and RT prediction with MSFINDER and Retip	620.467	[M+H]+	12.85	XVUVOVJNJMWWIF-KSLQPWOWNA-N
Foliachinenoside C;(-)-Foliachinenoside C	3	in silico MS2 and RT prediction with MSFINDER and Retip	621.216	[M+Na]+	4.31	JNTVMSUGCQQJNZ-HTKZOBOCNA-N
Brianodin B;(-)-Brianodin B	3	in silico MS2 and RT prediction with MSFINDER and Retip	621.216	[M+Na]+	4.01	WRMRTVQZNMWLDP-NCCFVTSUNA-N
Antibiotic 6108D	3	in silico MS2 and RT prediction with MSFINDER and Retip	622.396	[M+H]+	5.87	FXKCKGOZHSTTGM-VHTFHNQINA-N
Phaeophorbide	3	in silico MS2 and RT prediction with MSFINDER and Retip	623.288	[M+H]+	11.65	ATGWBOWMZVPOGA-DVKKQCGRNA-N
Presqualene diphosphate	3	in silico MS2 and RT prediction with MSFINDER and Retip	625.285	[M+K]+	4.33	ATZKAUGGNMSCCY-VYCBRMPGSA-N
DG(18:4(6Z,9Z,12Z,15Z)/18:3(9Z,12Z,15Z)/0:0)	3	in silico MS2 and RT prediction with MSFINDER and Retip	628.501	[M+NH4]+	11.27	RKSUIYABXCMIDT-NSCDTNHQSA-N
Cimilactone A;(-)-Cimilactone A	3	in silico MS2 and RT prediction with MSFINDER and Retip	629.317	[M+K]+	4.51	RKTWPXXLEHCPIO-YEBZOTOENA-N
3',4'-Didehydro-1,1',2,2'-tetrahydro-1,1'-dimethoxy-psi,psi-caroten-4-one	3	in silico MS2 and RT prediction with MSFINDER and Retip	630.479	[M+NH4]+	10.8	KSAQIRSWZGLSET-BOIKDPEESA-N
Sarcohydroquinone sulfate A	3	in silico MS2 and RT prediction with MSFINDER and Retip	631.395	[M+CH3OH+H]+	10.3	SALJZRCSOZEVES-LAAQXVIISA-N
C00050629	3	in silico MS2 and RT prediction with MSFINDER and Retip	631.42	[M+H]+	10.1	HNUDFMQYCDPTHE-VRWCPGFSNA-N
Fucoxanthinol	3	in silico MS2 and RT prediction with MSFINDER and Retip	634.453	[M+NH4]+	10.97	NZEPSBGUXWWWSI-KZOZQWPVNA-N
UNPD124395	3	in silico MS2 and RT prediction with MSFINDER and Retip	635.141	[M+H]+	1.97	QKGKCIQHXQLDCR-GPHMJDBDNA-N
3',4'-Didehydro-1,1',2,2'-tetrahydro-1,1'-dimethoxy-psi,psi-caroten-4-one	3	in silico MS2 and RT prediction with MSFINDER and Retip	635.435	[M+Na]+	10.8	KSAQIRSWZGLSET-BOIKDPEESA-N
Fumonisin AK1	3	in silico MS2 and RT prediction with MSFINDER and Retip	636.4	[M+CH3OH+H]+	5.29	QROJNSDGLZKJGS-UHFFFAOYNA-N
ADP-L-glycero-beta-D-manno-heptopyranose	3	in silico MS2 and RT prediction with MSFINDER and Retip	637.121	[M+NH4]+	1.96	KMSFWBYFWSKGGR-DCMQZVGLNA-N
Foliachinenoside C;(-)-Foliachinenoside C	3	in silico MS2 and RT prediction with MSFINDER and Retip	637.192	[M+K]+	4.31	JNTVMSUGCQQJNZ-HTKZOBOCNA-N
Rescinnamidine;2',3'-Dihydrorescinnamine	3	in silico MS2 and RT prediction with MSFINDER and Retip	637.307	[M+H]+	11.23	PYYLUPQQQNZLDO-ZVZRWGEGNA-N
UNPD223451	3	in silico MS2 and RT prediction with MSFINDER and Retip	638.391	[M+ACN+Na]+	5.82	BTJWCMXMRRAKOU-LCCKZBTOSA-N
PS(14:1(9Z)/14:1(9Z))	3	in silico MS2 and RT prediction with MSFINDER and Retip	640.407	[M+H-2H2O]+	5.51	BPFJDFFAZFFCBH-QPBIGPORSA-N
Pyrinodemin C	3	in silico MS2 and RT prediction with MSFINDER and Retip	642.516	[M+2ACN+H]+	11.83	FRALZFIIIKECNY-WAJAPOGWNA-N
(E,E)-4,4''-Bi(N-4-hydroxycinnamoylserotonin)	3	in silico MS2 and RT prediction with MSFINDER and Retip	643.255	[M+H]+	11.36	OIUNULHHOJRJBI-IAGONARPSA-N
Methyl pheophorbide a	3	in silico MS2 and RT prediction with MSFINDER and Retip	645.249	[M+K]+	11.77	IWKYEJKHXKRZIJ-PIEZJCHHNA-N
Phaeophorbide	3	in silico MS2 and RT prediction with MSFINDER and Retip	645.27	[M+Na]+	11.65	ATGWBOWMZVPOGA-DVKKQCGRNA-N
Paratunamide A;(-)-Paratunamide A	3	in silico MS2 and RT prediction with MSFINDER and Retip	645.279	[M+2ACN+H]+	4.02	XEQPPTNZKGNKKE-VCTORENLNA-N
PE(P-16:0/14:1(9Z))	3	in silico MS2 and RT prediction with MSFINDER and Retip	646.475	[M+H]+	9.75	BEOOYKHWLKFXRC-IEGLPGIQSA-N
5,7-Dihydroxy-8-3',4',5'-tetramethoxyflavone 5-O-rhamnoside-6-C-glucoside	3	in silico MS2 and RT prediction with MSFINDER and Retip	647.196	[M+H-2H2O]+	4.34	UQHLTUQPRGENNU-MUMCTMMINA-N
DG(15:1(9Z)/22:6(4Z,7Z,10Z,13Z,16Z,19Z)/0:0)[iso2]	3	in silico MS2 and RT prediction with MSFINDER and Retip	647.473	[M+Na]+	11.83	PBTFNQHSIYCLII-ZOQJCQFXNA-N
Dysoxylin C	3	in silico MS2 and RT prediction with MSFINDER and Retip	648.381	[M+NH4]+	4.45	LGJGIWPBFNKQNM-YWZVHLDRNA-N
LysoPC(22:6(4Z,7Z,10Z,13Z,16Z,19Z))	3	in silico MS2 and RT prediction with MSFINDER and Retip	650.397	[M+2ACN+H]+	5.12	LSOWKZULVQWMLY-APPDJCNMSA-N
Methyl 3,4,6-tri-O-galloyl-beta-D-glucopyranoside	3	in silico MS2 and RT prediction with MSFINDER and Retip	651.114	[M+H]+	1.99	DXMITXYQZDSXOV-UHFFFAOYNA-N
UNPD103111	3	in silico MS2 and RT prediction with MSFINDER and Retip	651.358	[M+Na]+	8.43	UUAVOMRKSKLDKC-CLCDADGWNA-N
Cichorioside D;(-)-Cichorioside D	3	in silico MS2 and RT prediction with MSFINDER and Retip	653.294	[M+2ACN+H]+	3	AIDJHLWRZXMPHP-OLGSXGAXNA-N
UNPD84510	3	in silico MS2 and RT prediction with MSFINDER and Retip	653.337	[M+ACN+H]+	4.45	ARQFJAOVFLFHON-MGROJMTLNA-N
Withanoside III;(-)-Withanoside III	3	in silico MS2 and RT prediction with MSFINDER and Retip	653.352	[M+H]+	6.99	RRWWSMHWDKRGQC-SNBSLISYNA-N
Daedaleaside D;(+)-Daedaleaside D	3	in silico MS2 and RT prediction with MSFINDER and Retip	653.406	[M+H-2H2O]+	7.46	RSBAXXTZWHYISF-OQWXSBENNA-N
Rescinnamidine;2',3'-Dihydrorescinnamine	3	in silico MS2 and RT prediction with MSFINDER and Retip	654.334	[M+NH4]+	11.24	PYYLUPQQQNZLDO-ZVZRWGEGNA-N
Dragonamide A;(-)-Dragonamide A	3	in silico MS2 and RT prediction with MSFINDER and Retip	654.455	[M+H]+	10.57	LFBMRFDBJDFLTN-OQPGNNFNNA-N
Momordicoside G	3	in silico MS2 and RT prediction with MSFINDER and Retip	655.422	[M+Na]+	7.65	MQGABSJZVJOSCX-OQLLNIDSNA-N
Bistellettazine A	3	in silico MS2 and RT prediction with MSFINDER and Retip	658.511	[M+NH4]+	11.22	MGSPLLAFQGMMFJ-AFCHPKOXNA-N
UNPD75462	3	in silico MS2 and RT prediction with MSFINDER and Retip	658.512	[M+H]+	11.37	RIMXVCHDYMWUNB-VMAZOFSCNA-N
Steviobioside	3	in silico MS2 and RT prediction with MSFINDER and Retip	660.36	[M+NH4]+	6.91	OMHUCGDTACNQEX-UHFFFAOYNA-N
PE(14:1(9Z)/16:1(9Z))	3	in silico MS2 and RT prediction with MSFINDER and Retip	660.455	[M+H]+	7.3	ZXHZOZOKRSLOIE-HMDBOOPKSA-N
PE(P-16:0/15:1(9Z))	3	in silico MS2 and RT prediction with MSFINDER and Retip	660.49	[M+H]+	10	YGXCGMXZNIDWDO-AHITUGANNA-N
Phaeophorbide	3	in silico MS2 and RT prediction with MSFINDER and Retip	661.244	[M+K]+	2.7	ATGWBOWMZVPOGA-DVKKQCGRNA-N
Gagunin G;(+)-Gagunin G	3	in silico MS2 and RT prediction with MSFINDER and Retip	661.413	[M+2ACN+H]+	11.02	BNFUNWYCZCZCDU-AENWMRRKNA-N
Virescenoside R;(+)-Virescenoside R	3	in silico MS2 and RT prediction with MSFINDER and Retip	662.377	[M+NH4]+	6.95	QLNIKMOZYWMKSZ-GVKXSJNZNA-N
Plactin B	3	in silico MS2 and RT prediction with MSFINDER and Retip	662.435	[M+NH4]+	6.24	JKGLILYBNUKSGI-YOBKDCQVNA-N
Goyaglycoside c	3	in silico MS2 and RT prediction with MSFINDER and Retip	663.455	[M+H]+	11.94	JYKQEJLWLRMCRC-MHWRWJLKNA-N
Bistellettazine A	3	in silico MS2 and RT prediction with MSFINDER and Retip	663.467	[M+Na]+	11.37	MGSPLLAFQGMMFJ-AFCHPKOXNA-N
Atratoglaucoside A	3	in silico MS2 and RT prediction with MSFINDER and Retip	665.352	[M+H]+	8.96	FMBUMRDTMFABLR-AJYUZISRNA-N
Philonotisflavone-4'''-methyl ether	3	in silico MS2 and RT prediction with MSFINDER and Retip	667.152	[M+2ACN+H]+	4.76	UGYBHWIEEATMON-UHFFFAOYSA-N
Virescenoside R;(+)-Virescenoside R	3	in silico MS2 and RT prediction with MSFINDER and Retip	667.331	[M+Na]+	6.94	QLNIKMOZYWMKSZ-GVKXSJNZNA-N
Coroloside	3	in silico MS2 and RT prediction with MSFINDER and Retip	667.368	[M+H]+	8.51	BKLVUVLBSZAKIF-UHFFFAOYNA-N
Plactin A	3	in silico MS2 and RT prediction with MSFINDER and Retip	667.389	[M+Na]+	6.25	SOOXNNCNHJEQMQ-UHFFFAOYNA-N
Baumycin B1	3	in silico MS2 and RT prediction with MSFINDER and Retip	670.251	[M+H-H2O]+	4.2	FEMNWPQDEXLDKE-YGCDTEFWNA-N
Digonazole	3	in silico MS2 and RT prediction with MSFINDER and Retip	670.439	[M+ACN+Na]+	7.41	UTUBLIPCJHOMFB-UHFFFAOYNA-N
UNPD71856	3	in silico MS2 and RT prediction with MSFINDER and Retip	670.471	[M+CH3OH+H]+	12.68	UYKAHQIMMZSKPD-DDPJGRKGNA-N
Moluccensin E	3	in silico MS2 and RT prediction with MSFINDER and Retip	671.306	[M+H]+	2.77	UBIMVMXJRZDHMZ-UHFFFAOYNA-N
UNPD153875	3	in silico MS2 and RT prediction with MSFINDER and Retip	671.327	[M+2ACN+H]+	8.11	XDNOZUONMSETBV-QNASOZEWNA-N
UNPD133059	3	in silico MS2 and RT prediction with MSFINDER and Retip	671.365	[M+H]+	6.54	SIHNVIYDUABLCE-AXXJZQKJNA-N
Neofolitispate 2	3	in silico MS2 and RT prediction with MSFINDER and Retip	672.495	[M+H]+	11.33	VRGAAMLWQVKVTJ-JECQXCJTNA-N
Alpindenoside A	3	in silico MS2 and RT prediction with MSFINDER and Retip	673.343	[M+CH3OH+H]+	4.61	IZXTUEVONKCKCQ-CDRXILIDNA-N
UNPD95584	3	in silico MS2 and RT prediction with MSFINDER and Retip	674.434	[M+NH4]+	7.33	VMZQAJMCMVLJFB-ZXMHVGTONA-N
PA(P-16:0e/18:2(9Z,12Z))	3	in silico MS2 and RT prediction with MSFINDER and Retip	674.506	[M+NH4]+	9	OLCTYLMZTXKGKH-BBNWHMLASA-N
UNPD71420	3	in silico MS2 and RT prediction with MSFINDER and Retip	675.421	[M+NH4]+	10.28	BUTYMPIHOBYBQW-GWHKVLHZNA-N
Argifin;FTD 0668	3	in silico MS2 and RT prediction with MSFINDER and Retip	676.298	[M+H]+	3.76	UHBHXSDKGLPPGO-UKDTUBJNNA-N
Virescenoside R;(+)-Virescenoside R	3	in silico MS2 and RT prediction with MSFINDER and Retip	677.381	[M+CH3OH+H]+	9.63	QLNIKMOZYWMKSZ-GVKXSJNZNA-N
Capsianoside I	3	in silico MS2 and RT prediction with MSFINDER and Retip	678.373	[M+NH4]+	6.03	ISQUNAAALVXWGI-DFTZOVBQNA-N
PS(P-16:0/13:0)	3	in silico MS2 and RT prediction with MSFINDER and Retip	678.48	[M+H]+	10.96	OXGZETUPCROIDN-ZAZBUNNBNA-N
UNPD201732	3	in silico MS2 and RT prediction with MSFINDER and Retip	679.391	[M+Na]+	7.34	FLEORJNFURFPGL-CIKBZCPXNA-N
Astaxanthin	3	in silico MS2 and RT prediction with MSFINDER and Retip	679.441	[M+2ACN+H]+	11.37	MQZIGYBFDRPAKN-IDLFNPRFNA-N
DG(18:1(9Z)/20:5(5Z,8Z,11Z,14Z,17Z)/0:0)	3	in silico MS2 and RT prediction with MSFINDER and Retip	679.463	[M+K]+	10.78	JLJZWBKQVKCOJP-GZAZVFSZSA-N
Steviobioside	3	in silico MS2 and RT prediction with MSFINDER and Retip	681.291	[M+K]+	6.91	OMHUCGDTACNQEX-UHFFFAOYNA-N
Dantaxusin C	3	in silico MS2 and RT prediction with MSFINDER and Retip	681.296	[M+H]+	4.56	MOYWWZOOLCCTFX-XRYBAJIBNA-N
UNPD56320	3	in silico MS2 and RT prediction with MSFINDER and Retip	681.311	[M+Na]+	5.55	BUOSLGZEBFSUDD-YPNXLCAUNA-N
Capsianoside I	3	in silico MS2 and RT prediction with MSFINDER and Retip	683.328	[M+Na]+	6.03	ISQUNAAALVXWGI-DFTZOVBQNA-N
Petroformyne 1	3	in silico MS2 and RT prediction with MSFINDER and Retip	686.543	[M+NH4]+	11.82	JMDLXSJNUCOOQN-KRECXNKNNA-N
Anchinopeptolide A	3	in silico MS2 and RT prediction with MSFINDER and Retip	687.331	[M+H-2H2O]+	5.19	HCBLDZZFUFWBIT-PWDIZTEBNA-N
PC(P-16:0/14:1(9Z))	3	in silico MS2 and RT prediction with MSFINDER and Retip	688.523	[M+H]+	11.15	RMEZSZVJIYBBIJ-MWXRYAQWSA-N
Stachyose	3	in silico MS2 and RT prediction with MSFINDER and Retip	689.212	[M+Na]+	1.28	UQZIYBXSHAGNOE-CYDMKDQUNA-N
Skullcapflavone I 2'-(2''-E-cinnamoylglucoside);5-Hydroxy-7,8-dimethoxy-2-[2-[[2-O-[(2E)-1-oxo-3-phenyl-2-propenyl]-beta-D-glucopyranosyl]oxy]phenyl]-4H-1-benzopyran-4-one	3	in silico MS2 and RT prediction with MSFINDER and Retip	689.242	[M+2ACN+H]+	3.02	FOWHMJBXCXWUGU-ZVAYBFPUNA-N
UNPD210196	3	in silico MS2 and RT prediction with MSFINDER and Retip	691.39	[M+2Na-H]+	5.96	CKJRTXBDGMBSDZ-CSJDMZAZSA-N
Petroformyne 1	3	in silico MS2 and RT prediction with MSFINDER and Retip	691.499	[M+Na]+	11.82	JMDLXSJNUCOOQN-KRECXNKNNA-N
MK 7924	3	in silico MS2 and RT prediction with MSFINDER and Retip	692.421	[M+NH4]+	8.64	IIRNCNSOKWSLBX-VEDZBXBENA-N
UNPD181058	3	in silico MS2 and RT prediction with MSFINDER and Retip	694.336	[M+NH4]+	5.25	VNXFYHIODJMICD-VNPZOBKSNA-N
PG(P-16:0/14:1(9Z))	3	in silico MS2 and RT prediction with MSFINDER and Retip	694.494	[M+NH4]+	11.67	UERLHGISINMPNT-SAFJEPRONA-N
Nakinadine F	3	in silico MS2 and RT prediction with MSFINDER and Retip	694.522	[M+H]+	12.11	XMZHAKHAERJJSJ-DYMHTNKONA-N
All-trans-heptaprenyl diphosphate	3	in silico MS2 and RT prediction with MSFINDER and Retip	696.418	[M+ACN+H]+	9.67	LSJLEXWXRKTZAJ-YUIIPXGZNA-N
Gagunin J;(+)-Gagunin J	3	in silico MS2 and RT prediction with MSFINDER and Retip	696.438	[M+NH4]+	4.71	ACETYDTUPLBCGS-JMZNUKMQNA-N
UNPD12565	3	in silico MS2 and RT prediction with MSFINDER and Retip	697.364	[M+2Na-H]+	4.56	ATINGFMQHJZPDU-HCTYHARENA-N
Kurilensoside H	3	in silico MS2 and RT prediction with MSFINDER and Retip	697.434	[M+2ACN+H]+	10.25	SOVMHZODGWLPJC-ZDVPKGLUNA-N
UNPD76285	3	in silico MS2 and RT prediction with MSFINDER and Retip	699.295	[M+Na]+	5.25	AQPWEMLFCKNXBK-PQTDUJPKNA-N
3-Methoxyfaurithaline;(+)-3-Methoxyfaurithaline	3	in silico MS2 and RT prediction with MSFINDER and Retip	699.321	[M+H]+	4.97	OHRAOGOGUKPFCC-OBXPXUJENA-N
UNPD159699	3	in silico MS2 and RT prediction with MSFINDER and Retip	699.322	[M+Na]+	5.25	WFMUUUXXUIVMAH-HLDRGCTBNA-N
PA(19:1(9Z)/17:2(9Z,12Z))	3	in silico MS2 and RT prediction with MSFINDER and Retip	699.5	[M+H]+	7.89	LTZBUUBMMMLULI-XNUCCUOYNA-N
PA(18:3(9Z,12Z,15Z)/18:0)	3	in silico MS2 and RT prediction with MSFINDER and Retip	699.5	[M+H]+	7.4	XRZJERJYZPMSBZ-SMTKHEEVSA-N
Catheduline E2	3	in silico MS2 and RT prediction with MSFINDER and Retip	701.275	[M+H]+	5.32	JNJVNIAUYUVQJX-QJISGKSZNA-N
Leucascandrolide A	3	in silico MS2 and RT prediction with MSFINDER and Retip	701.394	[M+H]+	4.71	DJSCTOCFSZYDND-FKNNPDMINA-N
PA(O-16:0/20:3(8Z,11Z,14Z))	3	in silico MS2 and RT prediction with MSFINDER and Retip	702.538	[M+NH4]+	11.21	XAZWQDFVISZXQF-CKXISFNLNA-N
Tetrahydrofolyl-[Glu](n)	3	in silico MS2 and RT prediction with MSFINDER and Retip	704.257	[M+H]+	4.28	RXWVHRYZTWZATH-UHFFFAOYNA-N
Didemniserinolipid B;(+)-Didemniserinolipid B	3	in silico MS2 and RT prediction with MSFINDER and Retip	705.439	[M+ACN+H]+	11.01	FZIDSLBFXPDAQT-AHFSABOBNA-N
Mycolactone	3	in silico MS2 and RT prediction with MSFINDER and Retip	707.493	[M+H-2H2O]+	11.36	WKTLNJXZVDLRTJ-QRRXZRELSA-N
Cyclocanthoside A	3	in silico MS2 and RT prediction with MSFINDER and Retip	707.494	[M+2ACN+H]+	11.21	WWWSFRYQXBVZOD-FXPVXXKYNA-N
DG(19:1(9Z)/22:4(7Z,10Z,13Z,16Z)/0:0)[iso2]	3	in silico MS2 and RT prediction with MSFINDER and Retip	707.567	[M+Na]+	7.81	DZKRHXPDRRFIDM-BGJOTNHTNA-N
PS(O-16:0/15:0)	3	in silico MS2 and RT prediction with MSFINDER and Retip	708.515	[M+H]+	12.2	OHIPNGBMAJNIFN-JQKFOIGKNA-N
Antibiotic TAN 547A;Chitinovorin A	3	in silico MS2 and RT prediction with MSFINDER and Retip	710.245	[M+Na]+	4.2	QIKMSWPGMFAWFV-UHFFFAOYNA-N
UNPD32268	3	in silico MS2 and RT prediction with MSFINDER and Retip	711.358	[M+H-H2O]+	8.48	ZRMDVCHFVDSLJI-OEXPWCEANA-N
UNPD186988	3	in silico MS2 and RT prediction with MSFINDER and Retip	713.338	[M+Na]+	5.93	GNEYRRAPUPRVMI-XMPCPLHBNA-N
UNPD124338	3	in silico MS2 and RT prediction with MSFINDER and Retip	713.338	[M+CH3OH+H]+	4.56	LQDOCWMCLVQYDS-DKKPLQGMNA-N
UNPD225528	3	in silico MS2 and RT prediction with MSFINDER and Retip	713.457	[M+H]+	3.66	HXAISVKVHZQXTH-UZMAQJPHSA-N
Hyalodendroside B;(+)-Hyalodendroside B	3	in silico MS2 and RT prediction with MSFINDER and Retip	715.389	[M+K]+	8.61	CXHPXRHMWVTPLG-OWDRZVOJNA-N
Rhodopin glucoside;1-(beta-D-Glucopyranosyloxy)-1,2-dihydro-psi,psi-carotene	3	in silico MS2 and RT prediction with MSFINDER and Retip	717.511	[M+H]+	7.89	WEELHWARVOLEJX-WPLVGOEFNA-N
PG(14:1(9Z)/15:1(9Z))	3	in silico MS2 and RT prediction with MSFINDER and Retip	718.462	[M+ACN+H]+	7.34	BAWDIQRVSWNRPE-UNJOEJKZNA-N
PE(18:1(9Z)/16:0)	3	in silico MS2 and RT prediction with MSFINDER and Retip	718.532	[M+H]+	10.82	DVXMEPWDARXHCX-OTMQOFQLSA-N
Lyngbyapeptin B;(-)-Lyngbyapeptin B	3	in silico MS2 and RT prediction with MSFINDER and Retip	722.362	[M+H]+	6.41	FSPMQCXNAYXLFE-XMHNBKRENA-N
PE(P-16:0/20:5(5Z,8Z,11Z,14Z,17Z))	3	in silico MS2 and RT prediction with MSFINDER and Retip	722.507	[M+H]+	10.94	RLLOITCRNQRGJD-DFAKUSJGSA-N
PA(18:4(6Z,9Z,12Z,15Z)/18:3(6Z,9Z,12Z))	3	in silico MS2 and RT prediction with MSFINDER and Retip	723.468	[M+CH3OH+H]+	11.36	ALOGJFKHMXDEGC-LNKMRZDISA-N
PA(18:0/18:2(9Z,12Z))	3	in silico MS2 and RT prediction with MSFINDER and Retip	723.489	[M+Na]+	10.76	QYYWMYCDFOLKKH-DAKWMOBOSA-N
Fasciculol F	3	in silico MS2 and RT prediction with MSFINDER and Retip	724.454	[M+H]+	5.47	YKNPFZYHSXIFMX-UHFFFAOYNA-N
Bismurrayafoline E	3	in silico MS2 and RT prediction with MSFINDER and Retip	725.43	[M+H]+	6.69	OUSUKIXJVMBEMB-YAGSLNJISA-N
Butyl 3'-O-acetyl-2'-O-butanoyl-4,6,4'-tri-O-(2-methylpropanoyl)-neohesperidoside	3	in silico MS2 and RT prediction with MSFINDER and Retip	727.353	[M+Na]+	6.12	WXMKBABSBCDFIM-PDNYMXBBNA-N
Oxygambogic acid;(-)-Oxygambogic acid	3	in silico MS2 and RT prediction with MSFINDER and Retip	727.353	[M+2ACN+H]+	6.93	AAEQTEKIFSEBLF-HIIZDWOENA-N
Zucchini factor B	3	in silico MS2 and RT prediction with MSFINDER and Retip	727.453	[M+ACN+Na]+	11	VKNUHXUEPNYSDN-UHFFFAOYNA-N
C00050612	3	in silico MS2 and RT prediction with MSFINDER and Retip	730.294	[M+NH4]+	4.69	WENLQSBQPMFCOA-LPEUMLFWNA-N
UNPD115196	3	in silico MS2 and RT prediction with MSFINDER and Retip	730.326	[M+K]+	6.32	LLZLNFVFAZZRDM-NBINRMHVNA-N
Isorientin 4'-O-glucoside 2''-O-p-hydroxybenzoate	3	in silico MS2 and RT prediction with MSFINDER and Retip	731.181	[M+H]+	3.45	KTLHNQIKDFYBAF-KFHJZMCQNA-N
Cyclopassifloside VII	3	in silico MS2 and RT prediction with MSFINDER and Retip	732.449	[M+NH4]+	11.12	MOYBUGGNPKXCHY-UHFFFAOYNA-N
PE(15:0/20:1(11Z))	3	in silico MS2 and RT prediction with MSFINDER and Retip	732.548	[M+H]+	9.5	DAZYZDVAACSMFA-DYFSFZQGSA-N
Manassantin A;(-)-Manassantin A	3	in silico MS2 and RT prediction with MSFINDER and Retip	733.364	[M+H]+	6.08	ZGXXNVOBEIRACL-LJLMIKCGNA-N
Taxagifine	3	in silico MS2 and RT prediction with MSFINDER and Retip	735.251	[M+K]+	4.69	FQCUWQFKTUBVLA-YIVAOXQANA-N
PA(O-18:0/20:3(8Z,11Z,14Z))	3	in silico MS2 and RT prediction with MSFINDER and Retip	735.525	[M+Na]+	11.81	BRNNIAKTNFKUHP-WKKVZDAJNA-N
UNPD162748	3	in silico MS2 and RT prediction with MSFINDER and Retip	736.357	[M+2ACN+H]+	5.81	LHBAFQURKXEAHO-QMMLVSOCNA-M
Capsoside A	3	in silico MS2 and RT prediction with MSFINDER and Retip	736.415	[M+ACN+H]+	6.29	WMXPZMBCAXYUAO-AWNIVKPZNA-N
WK 142B	3	in silico MS2 and RT prediction with MSFINDER and Retip	736.433	[M+H-H2O]+	4.66	JBLKOIKRLJBTMG-ZOWSMTHHNA-N
UNPD227658	3	in silico MS2 and RT prediction with MSFINDER and Retip	737.338	[M+H]+	6.15	LQHKXNBSHAAFKT-KKHYYENMSA-N
UNPD163857	3	in silico MS2 and RT prediction with MSFINDER and Retip	737.376	[M+K]+	7.39	UWQBFTANAVZYGY-FBLLPUAONA-N
UNPD163857	3	in silico MS2 and RT prediction with MSFINDER and Retip	737.376	[M+K]+	7.56	UWQBFTANAVZYGY-FBLLPUAONA-N
PA(P-20:0/20:4(5Z,8Z,11Z,14Z))	3	in silico MS2 and RT prediction with MSFINDER and Retip	737.541	[M+H]+	12.39	JDEKYENVYXSEFU-DZBRGQHANA-N
Leucascandrolide A	3	in silico MS2 and RT prediction with MSFINDER and Retip	739.354	[M+K]+	6.44	DJSCTOCFSZYDND-FKNNPDMINA-N
Vobtusine	3	in silico MS2 and RT prediction with MSFINDER and Retip	741.369	[M+Na]+	6.29	IIMPGJMHQMBXKL-XCGKBCEANA-N
Antanapeptin C;(-)-Antanapeptin C	3	in silico MS2 and RT prediction with MSFINDER and Retip	741.481	[M+H]+	10.06	NIFSOTSGUFBSPF-XNIQSLCXNA-N
Leupyrrin C	3	in silico MS2 and RT prediction with MSFINDER and Retip	742.424	[M+NH4]+	5.98	XLXHKRNRAZZHCX-ITZKEPMANA-N
PG(18:2(9Z,12Z)/13:0)	3	in silico MS2 and RT prediction with MSFINDER and Retip	743.423	[M+K]+	6.61	LEQIXGBEZBNXGA-SJZURPHPNA-N
Isothalicrine;(+)-Isothalicrine	3	in silico MS2 and RT prediction with MSFINDER and Retip	745.364	[M+H]+	6.87	IJVBJQZGTABEMP-RFTMCNCJNA-N
Isothalicrine;(+)-Isothalicrine	3	in silico MS2 and RT prediction with MSFINDER and Retip	745.365	[M+H]+	6.23	IJVBJQZGTABEMP-RFTMCNCJNA-N
PA(15:0/22:6(4Z,7Z,10Z,13Z,16Z,19Z))	3	in silico MS2 and RT prediction with MSFINDER and Retip	745.422	[M+K]+	4.8	AUQJMTAYSKRMCC-FRGLPGJGSA-N
Cherinonaine	3	in silico MS2 and RT prediction with MSFINDER and Retip	746.319	[M+NH4]+	5.41	GGWMKGFGKXXORT-HONZKESMNA-N
PE(20:5(5Z,8Z,11Z,14Z,17Z)/15:0)	3	in silico MS2 and RT prediction with MSFINDER and Retip	746.472	[M+Na]+	10.36	PTVLNAMVOQSVMI-HGOJVSOMSA-N
WA 8242A1	3	in silico MS2 and RT prediction with MSFINDER and Retip	746.564	[M+ACN+Na]+	11.2	BSNMYXPQSLGSDY-SISBTQTPNA-N
Pandicine	3	in silico MS2 and RT prediction with MSFINDER and Retip	747.379	[M+H]+	5.97	RKBLGNPKDGETAR-OUKQBFOZNA-N
PA(19:0/20:0)	3	in silico MS2 and RT prediction with MSFINDER and Retip	747.593	[M+H]+	11.92	DEQWDWORTDIDNV-RRHRGVEJSA-N
Bidentatoside II	3	in silico MS2 and RT prediction with MSFINDER and Retip	751.425	[M+H]+	10.36	FDBQAHJAKLTDEC-NPTOQOKQNA-N
Calocedimer D	3	in silico MS2 and RT prediction with MSFINDER and Retip	751.501	[M+2ACN+H]+	11.81	BBCILNXOYDORQP-HBNRZESBNA-N
PE-Cer(d14:2(4E,6E)/24:1(15Z))	3	in silico MS2 and RT prediction with MSFINDER and Retip	751.52	[M+K]+	11.34	QFUFVSYJHLNTNO-XJQRGJTPNA-N
Boivinide A	3	in silico MS2 and RT prediction with MSFINDER and Retip	752.388	[M+ACN+H]+	5.58	SPNFRQDQOJKTSQ-ZNZUWQLQNA-N
UNPD165110	3	in silico MS2 and RT prediction with MSFINDER and Retip	756.44	[M+ACN+Na]+	6.65	CRLGWYVKIHJOAY-IQMOZJEVNA-N
Vobtusine	3	in silico MS2 and RT prediction with MSFINDER and Retip	757.345	[M+K]+	6.29	IIMPGJMHQMBXKL-XCGKBCEANA-N
UNPD2430	3	in silico MS2 and RT prediction with MSFINDER and Retip	757.364	[M+H]+	4.66	YOXHHOCTPGILPJ-CETZHLFXNA-N
Antibiotic YS 822A;YS 822A	3	in silico MS2 and RT prediction with MSFINDER and Retip	759.419	[M+NH4]+	5.69	HCAJMOSNTHQEGE-QVCTZAMVNA-N
Pentandroside C;(+)-Pentandroside C	3	in silico MS2 and RT prediction with MSFINDER and Retip	760.45	[M+NH4]+	6.16	IOPZVHATZOARDL-FBUFDRGANA-N
UNPD21319	3	in silico MS2 and RT prediction with MSFINDER and Retip	760.466	[M+NH4]+	10.51	FPJVOZOBTKXSEN-HFHAAIIVNA-N
Isothalirine	3	in silico MS2 and RT prediction with MSFINDER and Retip	761.395	[M+CH3OH+H]+	4.8	QAQKPFYSONCQAR-UHFFFAOYNA-N
PG(P-18:0/17:2(9Z,12Z))	3	in silico MS2 and RT prediction with MSFINDER and Retip	762.558	[M+NH4]+	10.74	DTDYQXMNJDUXLI-SXUMEEKUNA-N
UNPD178413	3	in silico MS2 and RT prediction with MSFINDER and Retip	763.474	[M+H]+	10.22	MCVAPTMLHAVOLH-AJTQQCAQNA-N
Kansuinin H;(+)-Kansuinin H	3	in silico MS2 and RT prediction with MSFINDER and Retip	764.317	[M+NH4]+	5.41	JUCOOGZXMGBGJB-TVLXFDHANA-N
UNPD179238	3	in silico MS2 and RT prediction with MSFINDER and Retip	764.374	[M+NH4]+	6.19	YCTKRMVYSFHSKT-ASWHSWFBNA-N
Antibiotic YS 822A;YS 822A	3	in silico MS2 and RT prediction with MSFINDER and Retip	764.373	[M+Na]+	6.3	HCAJMOSNTHQEGE-QVCTZAMVNA-N
(2E,4E,6E,8E,11S,13R)-11,13-dihydroxy-4,6,8-trimethyl-tetradeca-2,4,6,8-tetraenoic acid [(6S,7S,9E,12R)-12-[(E,1S,5R,6R,8R)-6,8-dihydroxy-1,3,5-trimethyl-non-3-enyl]-2-keto-7,9-dimethyl-1-oxacyclododec-9-en-6-yl] ester	3	in silico MS2 and RT prediction with MSFINDER and Retip	764.503	[M+ACN+Na]+	6.46	KRJSJTYCRKVVQA-MTKCPOAWSA-N
UNPD179107	3	in silico MS2 and RT prediction with MSFINDER and Retip	766.368	[M+NH4]+	5.7	YQPHYTXFTCXABZ-MLASENFXNA-N
UNPD132431	3	in silico MS2 and RT prediction with MSFINDER and Retip	767.385	[M+Na]+	6.36	MZNCWPOVMBLUSG-SMHJIKBHNA-N
UNPD227022	3	in silico MS2 and RT prediction with MSFINDER and Retip	767.405	[M+H]+	10.36	PACFEWBCWPTFFL-RPJXQGMSSA-N
UNPD203417	3	in silico MS2 and RT prediction with MSFINDER and Retip	767.421	[M+ACN+Na]+	8.38	MOHJMEJNJVKXED-LXAWLNNJNA-N
Ginsenoside Rg5	3	in silico MS2 and RT prediction with MSFINDER and Retip	767.494	[M+H]+	11.21	NJUXRKMKOFXMRX-JJFYIABZNA-N
UNPD164383	3	in silico MS2 and RT prediction with MSFINDER and Retip	769.328	[M+K]+	6.3	AJDZZZMMMKAKLQ-DQWNKMTLNA-N
UNPD20619	3	in silico MS2 and RT prediction with MSFINDER and Retip	771.285	[M+CH3OH+H]+	5.12	HYXNRNYIGSYSGV-ZBSZVIOYNA-N
Conodiparine D	3	in silico MS2 and RT prediction with MSFINDER and Retip	771.379	[M+Na]+	5.97	IPOIURWVTPXYSD-DQWHOSBYNA-N
Erythromycin	3	in silico MS2 and RT prediction with MSFINDER and Retip	772.426	[M+K]+	3.14	ULGZDMOVFRHVEP-RWJQBGPGSA-N
UNPD61849	3	in silico MS2 and RT prediction with MSFINDER and Retip	772.434	[M+ACN+H]+	7.02	XAITXSGSAXCMGO-WKFFLJEQNA-N
Askendoside C	3	in silico MS2 and RT prediction with MSFINDER and Retip	774.502	[M+NH4]+	11.02	CQGUDVRRZKLXFR-YHROOGGHNA-N
PA(22:2(13Z,16Z)/18:0)	3	in silico MS2 and RT prediction with MSFINDER and Retip	774.595	[M+NH4]+	11.79	CJJKZZHVEPXAAM-JMMITYAOSA-N
Nakinadine F	3	in silico MS2 and RT prediction with MSFINDER and Retip	776.576	[M+2ACN+H]+	11.13	XMZHAKHAERJJSJ-DYMHTNKONA-N
Isothalicrine;(+)-Isothalicrine	3	in silico MS2 and RT prediction with MSFINDER and Retip	777.39	[M+CH3OH+H]+	6.84	IJVBJQZGTABEMP-RFTMCNCJNA-N
Sublanceoside G3	3	in silico MS2 and RT prediction with MSFINDER and Retip	779.422	[M+H]+	8.38	BKMTVEKXAQFBQB-KNTBCXQBNA-N
Askendoside C	3	in silico MS2 and RT prediction with MSFINDER and Retip	779.458	[M+Na]+	11.02	CQGUDVRRZKLXFR-YHROOGGHNA-N
1,28-Octacosanediol diferulate	3	in silico MS2 and RT prediction with MSFINDER and Retip	779.551	[M+H]+	11.79	BNCYSRWQCKLMQU-QUTRQNJUSA-N
Sublanceoside I1;(-)-Sublanceoside I1	3	in silico MS2 and RT prediction with MSFINDER and Retip	780.46	[M+NH4]+	4.75	XKWWUEUBVBEWMG-YIXXKYBVNA-N
Glisoprenin D	3	in silico MS2 and RT prediction with MSFINDER and Retip	781.586	[M+2Na-H]+	12.77	NWNDDBQOCUDCDV-QYOQUFJENA-N
PS(15:1(9Z)/18:2(9Z,12Z))	3	in silico MS2 and RT prediction with MSFINDER and Retip	782.437	[M+K]+	5.48	AIWIBHBAGSYABQ-SZGFWDSJNA-N
Withanoside VI;(-)-Withanoside VI	3	in silico MS2 and RT prediction with MSFINDER and Retip	783.416	[M+H]+	8.64	MKCYAASFWFGIJK-PCLQJQBRNA-N
leucomycin V	3	in silico MS2 and RT prediction with MSFINDER and Retip	784.451	[M+2ACN+H]+	5.5	XYJOGTQLTFNMQG-KJHBSLKPSA-N
Pandicine	3	in silico MS2 and RT prediction with MSFINDER and Retip	785.322	[M+K]+	5.17	RKBLGNPKDGETAR-OUKQBFOZNA-N
Pregnadienolone-3-O-beta-D-gracillimatriose	3	in silico MS2 and RT prediction with MSFINDER and Retip	785.395	[M+H]+	6	VZYCYPQHUZOSIT-XWQPJPBRNA-N
Russelioside G;(-)-Russelioside G	3	in silico MS2 and RT prediction with MSFINDER and Retip	785.411	[M+H-H2O]+	5.39	MYNYJQCOFLMCEM-UPINQJIPNA-N
Russelioside G;(-)-Russelioside G	3	in silico MS2 and RT prediction with MSFINDER and Retip	785.417	[M+H-H2O]+	4.75	MYNYJQCOFLMCEM-UPINQJIPNA-N
FAD	3	in silico MS2 and RT prediction with MSFINDER and Retip	786.167	[M+H]+	3.27	VWWQXMAJTJZDQX-UYBVJOGSSA-N
Sanguiin H1	3	in silico MS2 and RT prediction with MSFINDER and Retip	787.104	[M+H]+	1.16	WKPZPHSGAOCQCK-UHFFFAOYNA-N
UNPD118835	3	in silico MS2 and RT prediction with MSFINDER and Retip	789.369	[M+Na]+	7.85	FTTHHGZRBOOVTE-IIECWAJVNA-N
Salinomycin;Antibiotic 61477;Coxistac	3	in silico MS2 and RT prediction with MSFINDER and Retip	789.448	[M+K]+	4.88	KQXDHUJYNAXLNZ-NZNWKSEANA-N
PS(P-18:0/18:4(6Z,9Z,12Z,15Z))	3	in silico MS2 and RT prediction with MSFINDER and Retip	790.493	[M+Na]+	5.58	OAXXFXVAVZAIRI-HKFLZXADNA-N
PS(P-16:0/21:0)	3	in silico MS2 and RT prediction with MSFINDER and Retip	790.59	[M+H]+	9.97	WTSCSBGIKLYSQE-QIUYIHOHNA-N
PS(O-20:0/17:1(9Z))	3	in silico MS2 and RT prediction with MSFINDER and Retip	790.59	[M+H]+	11.19	ATQLZAZHNZQPGD-HYFZSIHSNA-N
PS(O-18:0/19:1(9Z))	3	in silico MS2 and RT prediction with MSFINDER and Retip	790.591	[M+H]+	11.34	GNVQMWODSYHZEQ-CKTVKIBGNA-N
PE(20:5(5Z,8Z,11Z,14Z,17Z)/14:0)	3	in silico MS2 and RT prediction with MSFINDER and Retip	792.534	[M+2ACN+H]+	7.16	OQWZPIYVNUSNLG-KQKHHBPSSA-N
Gypsogenin 3-O-rhamnosylglucuronide	3	in silico MS2 and RT prediction with MSFINDER and Retip	793.436	[M+H]+	9.48	OLFGQBKWRYLUAQ-DEYGWBDUNA-N
PG(16:1(9Z)/22:6(4Z,7Z,10Z,13Z,16Z,19Z))	3	in silico MS2 and RT prediction with MSFINDER and Retip	793.492	[M+H]+	10.97	BRJYLBKRWAAAEC-BHJRESQJSA-N
Boivinide F	3	in silico MS2 and RT prediction with MSFINDER and Retip	794.394	[M+ACN+H]+	7.4	PFTYEQWDSBMMNY-RFNQMGJHNA-N
Lyciumoside IV	3	in silico MS2 and RT prediction with MSFINDER and Retip	794.455	[M+NH4]+	6.64	OEOWMDSFDQHCFJ-IDGBGVIZNA-N
Conodiparine A	3	in silico MS2 and RT prediction with MSFINDER and Retip	795.379	[M+2Na-H]+	3.95	YCZBPVXCHDXNAB-GFJFMXOLNA-N
Convalloside	3	in silico MS2 and RT prediction with MSFINDER and Retip	795.381	[M+2ACN+H]+	6.49	CAYUJEAJKPLCAV-UHFFFAOYNA-N
Spinasaponin A	3	in silico MS2 and RT prediction with MSFINDER and Retip	795.453	[M+H]+	9.26	BQPYEFAVIPEQIK-UHFFFAOYNA-N
UNPD195668	3	in silico MS2 and RT prediction with MSFINDER and Retip	795.47	[M+H]+	9.19	MAPSNGVGRCHNLN-VTTPNOIVNA-N
PA(22:2(13Z,16Z)/18:0)	3	in silico MS2 and RT prediction with MSFINDER and Retip	795.527	[M+K]+	11.8	CJJKZZHVEPXAAM-JMMITYAOSA-N
UNPD101312	3	in silico MS2 and RT prediction with MSFINDER and Retip	795.547	[M+2ACN+H]+	11.34	KWQYPXKHTVLTGI-OTUYOHGONA-N
18-Dihydromaridomycin III	3	in silico MS2 and RT prediction with MSFINDER and Retip	796.451	[M+H-2H2O]+	5.53	ZIHANNYXUKNEAF-BUHFOSPRNA-N
UNPD116875	3	in silico MS2 and RT prediction with MSFINDER and Retip	798.393	[M+H]+	6.26	HPTAIZCGFPPBIX-UMQHLXDNNA-N
Phomopsin B	3	in silico MS2 and RT prediction with MSFINDER and Retip	799.28	[M+2Na-H]+	5.35	FHJKRASPFQAQCV-VGBCPRNWNA-N
UNPD118905	3	in silico MS2 and RT prediction with MSFINDER and Retip	799.375	[M+Na]+	5.96	UTZXDLCIVUPSDX-ZIAMPQGWNA-N
UNPD118835	3	in silico MS2 and RT prediction with MSFINDER and Retip	799.41	[M+CH3OH+H]+	4.1	FTTHHGZRBOOVTE-IIECWAJVNA-N
UNPD119030	3	in silico MS2 and RT prediction with MSFINDER and Retip	799.411	[M+K]+	6.64	UEGLNKSRVIUTJF-ZVHUEERONA-N
UNPD145773	3	in silico MS2 and RT prediction with MSFINDER and Retip	800.408	[M+NH4]+	6.49	KTZZMWLZVNLUSX-XZMDHJNWNA-N
UNPD210577	3	in silico MS2 and RT prediction with MSFINDER and Retip	801.297	[M+K]+	4.92	DOBPZKDPGAREFK-MTQDYXJNSA-N
UNPD174050	3	in silico MS2 and RT prediction with MSFINDER and Retip	801.404	[M+2ACN+H]+	5.31	RUYYNYMAUYJTTE-CBDYZSMDNA-N
UNPD51331	3	in silico MS2 and RT prediction with MSFINDER and Retip	803.349	[M+H]+	6.26	RQFYCDKVNJQUSN-MBMMIBLZNA-N
UNPD96571	3	in silico MS2 and RT prediction with MSFINDER and Retip	805.183	[M+K]+	1.07	WUIREJPRBXPTDZ-SQWPCXIINA-N
UNPD75009	3	in silico MS2 and RT prediction with MSFINDER and Retip	805.181	[M+CH3OH+H]+	1.17	SNOBMBVOZWFXHF-PITZYAIFNA-N
UNPD147291	3	in silico MS2 and RT prediction with MSFINDER and Retip	805.332	[M+ACN+Na]+	5.7	DZCMZVBXQQILBE-VTBPWYQANA-N
UNPD195034	3	in silico MS2 and RT prediction with MSFINDER and Retip	805.365	[M+CH3OH+H]+	6.49	QQKFDAORSCNGEH-WPOZMJFUNA-N
PS(18:0/19:0)	3	in silico MS2 and RT prediction with MSFINDER and Retip	806.586	[M+H]+	10.72	XHYASAVUGBEIOU-GJYFHTIUNA-N
UNPD229952	3	in silico MS2 and RT prediction with MSFINDER and Retip	807.346	[M+CH3OH+H]+	5.95	UCAKAGIHSZCPST-FAYBNASRSA-N
Bryostatin 20	3	in silico MS2 and RT prediction with MSFINDER and Retip	810.43	[M+NH4]+	6.79	CYISYNAHSIYBII-HHTQQHJZNA-N
UNPD64112	3	in silico MS2 and RT prediction with MSFINDER and Retip	810.451	[M+NH4]+	6.41	WXWINKBXSHKMAQ-XCBQDOTMNA-N
Zygophyloside J	3	in silico MS2 and RT prediction with MSFINDER and Retip	811.407	[M+H]+	9.39	STGCLHXEGRGLMA-GUJKUUFMNA-N
PG(18:4(6Z,9Z,12Z,15Z)/20:5(5Z,8Z,11Z,14Z,17Z))	3	in silico MS2 and RT prediction with MSFINDER and Retip	811.447	[M+Na]+	8.47	FMCKRYLEGOKPJI-IGGKTRHTNA-N
UNPD223660	3	in silico MS2 and RT prediction with MSFINDER and Retip	811.521	[M+H]+	11.33	KVVWOEVABSSLIR-REURVNLQSA-N
PA(19:0/22:4(7Z,10Z,13Z,16Z))	3	in silico MS2 and RT prediction with MSFINDER and Retip	811.52	[M+2Na-H]+	11.2	HGHZFVJKBVRZOK-HCCSWTPFNA-N
UNPD64112	3	in silico MS2 and RT prediction with MSFINDER and Retip	815.407	[M+Na]+	5.61	WXWINKBXSHKMAQ-XCBQDOTMNA-N
PS(21:0/18:0)	3	in silico MS2 and RT prediction with MSFINDER and Retip	816.608	[M+H-H2O]+	11.63	AWLOVRYKWYZEEW-WMQSFMSKNA-N
PS(O-20:0/19:1(9Z))	3	in silico MS2 and RT prediction with MSFINDER and Retip	818.622	[M+H]+	11.78	FTTXHVPJDSNJJK-HGAFSJOLNA-N
PS(13:0/22:1(11Z))	3	in silico MS2 and RT prediction with MSFINDER and Retip	820.502	[M+2Na-H]+	11.11	RSPCCVKPCKASFS-LQHYVTKYNA-N
UNPD208778	3	in silico MS2 and RT prediction with MSFINDER and Retip	821.326	[M+2Na-H]+	4.9	SCWWNJYIUMBQKK-PUJUIREKNA-N
Grahamine D, (rel)-	3	in silico MS2 and RT prediction with MSFINDER and Retip	822.391	[M+2Na-H]+	6.49	BAWQSJNAIYVRIL-LFTRDUGVNA-N
UNPD214867	3	in silico MS2 and RT prediction with MSFINDER and Retip	824.431	[M+NH4]+	6.4	USGRJFJWJHTGOB-ABBPFCMUSA-N
Solacauline	3	in silico MS2 and RT prediction with MSFINDER and Retip	824.487	[M+H]+	4.83	WNUZFFNCQHQMDD-UHFFFAOYNA-N
UNPD125643	3	in silico MS2 and RT prediction with MSFINDER and Retip	827.407	[M+H]+	8.17	HJAYZHHYHVLIHY-UZYVOWCJNA-N
UNPD184116	3	in silico MS2 and RT prediction with MSFINDER and Retip	827.548	[M+Na]+	7.89	KGKFVLLBAYIMCM-CFTRLRGZSA-N
UNPD100388	3	in silico MS2 and RT prediction with MSFINDER and Retip	828.403	[M+NH4]+	6.23	YARXRLBVYWUZAE-KKXFIGSINA-N
UNPD71887	3	in silico MS2 and RT prediction with MSFINDER and Retip	829.291	[M+CH3OH+H]+	5.3	MIDZOMRMXNNVPX-DKXBFMHFNA-N
UNPD170735	3	in silico MS2 and RT prediction with MSFINDER and Retip	829.394	[M+2ACN+H]+	5.98	RZOFHOWMWMTHDX-SNLQSCQCNA-N
Ansamycin	3	in silico MS2 and RT prediction with MSFINDER and Retip	829.444	[M+H-H2O]+	4.83	KTYFUEQGJABZDI-CJDONMEANA-N
PS(20:4(5Z,8Z,11Z,14Z)/20:3(8Z,11Z,14Z))	3	in silico MS2 and RT prediction with MSFINDER and Retip	834.519	[M+H]+	5.65	IEHVRLNIHFLLMS-WUDDRQCASA-N
Nostocyclopeptide A2	3	in silico MS2 and RT prediction with MSFINDER and Retip	835.375	[M+2Na-H]+	6.37	OYHPNVXZUBWKJE-ZYAMHZMNSA-N
UNPD153935	3	in silico MS2 and RT prediction with MSFINDER and Retip	837.519	[M+H]+	10.95	LQKSHSFQQRCAFW-RQBGTCNBNA-N
UNPD229446	3	in silico MS2 and RT prediction with MSFINDER and Retip	839.338	[M+H]+	4.9	KOHCQTWZJFDEAO-PCXMIFBMSA-N
Catharine	3	in silico MS2 and RT prediction with MSFINDER and Retip	840.425	[M+NH4]+	5.7	KLFYPJRLOIHTCM-OCSKRRGYNA-N
UNPD8329	3	in silico MS2 and RT prediction with MSFINDER and Retip	840.441	[M+H]+	6.48	ULEFRTDHQOKFJM-GDOYWYLVNA-N
UNPD130810	3	in silico MS2 and RT prediction with MSFINDER and Retip	841.352	[M+H]+	4.76	RIMMUUJNTIPKDP-SEJBWLKUNA-N
(2b,3b)-Dihydroxy-30-nor-12,20(29)-oleanadiene-28-glucopyranosyloxy-23-oic acid 3-glucuronide	3	in silico MS2 and RT prediction with MSFINDER and Retip	842.419	[M+NH4]+	6.32	UDJQXYVUQBGNDM-UHFFFAOYNA-N
UNPD186507	3	in silico MS2 and RT prediction with MSFINDER and Retip	845.38	[M+ACN+H]+	5.63	RYVZESSSRCWVGW-RHKRJASRNA-N
PI(O-16:0/18:1(9Z))	3	in silico MS2 and RT prediction with MSFINDER and Retip	845.559	[M+Na]+	7.09	QXAIBJDDPUXXJM-CXBQSTIKNA-N
PI(O-18:0/16:1(9Z))	3	in silico MS2 and RT prediction with MSFINDER and Retip	845.559	[M+Na]+	7.56	CSXYLBJXZWGCHI-KKUWFWSHNA-N
PG(21:0/17:0)	3	in silico MS2 and RT prediction with MSFINDER and Retip	845.56	[M+K]+	7.89	BDCQSBKXGUEMPI-WMQSFMSKNA-N
(2b,3b)-Dihydroxy-30-nor-12,20(29)-oleanadiene-28-glucopyranosyloxy-23-oic acid 3-glucuronide	3	in silico MS2 and RT prediction with MSFINDER and Retip	847.376	[M+Na]+	6.32	UDJQXYVUQBGNDM-UHFFFAOYNA-N
Sucrose acetate isobutyrate	3	in silico MS2 and RT prediction with MSFINDER and Retip	847.404	[M+H]+	5.74	UVGUPMLLGBCFEJ-ROWWBAASNA-N
Ginsenoside C	3	in silico MS2 and RT prediction with MSFINDER and Retip	848.518	[M+ACN+Na]+	10.47	AGBCLJAHARWNLA-UHFFFAOYNA-N
PS(16:0/22:1(11Z))	3	in silico MS2 and RT prediction with MSFINDER and Retip	850.613	[M+CH3OH+H]+	10.76	JJVQNBMXGKRXMX-LSNKJBRINA-N
PS(22:2(13Z,16Z)/22:6(4Z,7Z,10Z,13Z,16Z,19Z))	3	in silico MS2 and RT prediction with MSFINDER and Retip	852.555	[M+H-2H2O]+	6.52	AAEHIVYIVPNEDF-MKJHNSTASA-N
Arylomycin A5	3	in silico MS2 and RT prediction with MSFINDER and Retip	853.474	[M+H]+	10.47	CMOSQWNMDWRORC-CJGVIRQWNA-N
Napsamycin C	3	in silico MS2 and RT prediction with MSFINDER and Retip	855.332	[M+H]+	4.29	MFEPAAMYDYMBSN-XHPQRKPJNA-N
Antibiotic CC 12;Lydicamycin	3	in silico MS2 and RT prediction with MSFINDER and Retip	855.547	[M+H]+	11.33	BCOQUXPMOLQABB-UHFFFAOYNA-N
PS(20:4(5Z,8Z,11Z,14Z)/22:6(4Z,7Z,10Z,13Z,16Z,19Z))	3	in silico MS2 and RT prediction with MSFINDER and Retip	856.511	[M+H]+	9.84	KJECAXDORGQZQA-XRQJXPHHSA-N
UNPD131919	3	in silico MS2 and RT prediction with MSFINDER and Retip	858.414	[M+NH4]+	6.07	KUECKAPWTZZFFZ-BXAVNMAQNA-N
PG(22:0/17:1(9Z))	3	in silico MS2 and RT prediction with MSFINDER and Retip	860.634	[M+ACN+H]+	11.52	AEKHDJYUSOPTLS-SBFFLVDMNA-N
UNPD9923	3	in silico MS2 and RT prediction with MSFINDER and Retip	861.553	[M+K]+	7.09	RKICXLYNWJAAJU-WAZZIULANA-N
UNPD130810	3	in silico MS2 and RT prediction with MSFINDER and Retip	863.333	[M+Na]+	4.76	RIMMUUJNTIPKDP-SEJBWLKUNA-N
Bacopaside III;(-)-Bacopaside III	3	in silico MS2 and RT prediction with MSFINDER and Retip	869.387	[M+Na]+	6.52	JZAZJIXVJNAOQD-XQCKADIZNA-N
UNPD198447	3	in silico MS2 and RT prediction with MSFINDER and Retip	870.45	[M+ACN+Na]+	6.41	IPRWTGWHEWMZOC-BPNUPGBDNA-N
PGP(16:0/20:3(8Z,11Z,14Z))	3	in silico MS2 and RT prediction with MSFINDER and Retip	870.523	[M+NH4]+	7.28	OFOWZJMRNRECQR-WQQWEMLQSA-N
Cationomycin	3	in silico MS2 and RT prediction with MSFINDER and Retip	873.463	[M+Na]+	7.47	TZXAYLJEVNVSIA-FNQRNAQLNA-N
Curassavioside A1;(+)-Curassavioside A1	3	in silico MS2 and RT prediction with MSFINDER and Retip	873.47	[M+H-H2O]+	4.91	JVLMYWWTHPAGCY-RLHDQTSXNA-N
PGP(18:0/18:2(9Z,12Z))	3	in silico MS2 and RT prediction with MSFINDER and Retip	877.501	[M+Na]+	5.04	BEGQHSCGKQAIAS-KKUBIFFLSA-N
Cladionol A;(+)-Cladionol A	3	in silico MS2 and RT prediction with MSFINDER and Retip	877.549	[M+H]+	6.99	GRDLKOZEWJLCMH-MOFZLMBUNA-N
PC(22:5(7Z,10Z,13Z,16Z,19Z)/22:6(4Z,7Z,10Z,13Z,16Z,19Z))	3	in silico MS2 and RT prediction with MSFINDER and Retip	880.582	[M+H]+	7.22	LIYXTHCSSCAYRI-VYKHTVRDSA-N
PI(22:2(13Z,16Z)/18:0)	3	in silico MS2 and RT prediction with MSFINDER and Retip	883.6	[M+H-2H2O]+	11.32	AGRIIGVRFSIIFE-SJURNENZNA-N
Antibiotic PA 114B;Antibiotic PA 114B1;Mikamycin B;Mikamycin IA;NSC 92554;PA 114B;Streptogramin B;Vernamycin Balpha	3	in silico MS2 and RT prediction with MSFINDER and Retip	884.43	[M+NH4]+	6.66	YGXCETJZBDTKRY-UHFFFAOYNA-N
Sansevistatin 1;(-)-Sansevistatin 1	3	in silico MS2 and RT prediction with MSFINDER and Retip	884.503	[M+NH4]+	7.02	DFNXUPWTNVNPER-GQUTYCHTNA-N
UNPD90808	3	in silico MS2 and RT prediction with MSFINDER and Retip	886.518	[M+H]+	6.96	DXTCIDPZTHJLKE-CKSQPPJUNA-N
Strychnohexamine	3	in silico MS2 and RT prediction with MSFINDER and Retip	886.518	[M+NH4]+	6.71	DXTTUINJHHYHFN-RFECWCEKNA-N
PG(22:0/19:0)	3	in silico MS2 and RT prediction with MSFINDER and Retip	890.68	[M+ACN+H]+	11.5	LXPGMLUUADAOEK-SXXWNBANNA-N
Curassavioside A1;(+)-Curassavioside A1	3	in silico MS2 and RT prediction with MSFINDER and Retip	891.468	[M+H]+	7.28	JVLMYWWTHPAGCY-RLHDQTSXNA-N
Borassoside A;(-)-Borassoside A	3	in silico MS2 and RT prediction with MSFINDER and Retip	891.474	[M+Na]+	6.71	CLBAIZZJADAEOT-HYYICUQVNA-N
Tolytoxin 23-acetate	3	in silico MS2 and RT prediction with MSFINDER and Retip	892.544	[M+H]+	10.44	XRFUHBYDYDAOID-COJJAMOBNA-N
UNPD172252	3	in silico MS2 and RT prediction with MSFINDER and Retip	895.56	[M+H]+	6.99	DZDVKDQQGJQHJF-LRTJWIHONA-N
PI(P-18:0/20:2(11Z,14Z))	3	in silico MS2 and RT prediction with MSFINDER and Retip	897.574	[M+Na]+	7.89	VNORBODRQREIMG-BKEHJXRINA-N
Funingenoside A;(-)-Funingenoside A	3	in silico MS2 and RT prediction with MSFINDER and Retip	899.429	[M+H]+	7.09	UTLCYLWFMDQSCF-MCKLOLJSNA-N
Ritterazine B	3	in silico MS2 and RT prediction with MSFINDER and Retip	899.573	[M+H]+	11.32	ORQGJGXNWBQQPK-ZJIUORISNA-N
UNPD190057	3	in silico MS2 and RT prediction with MSFINDER and Retip	906.503	[M+H]+	8.41	GIRIPBPYVQTCFF-CBMJYDRUNA-N
UNPD211109	3	in silico MS2 and RT prediction with MSFINDER and Retip	908.523	[M+NH4]+	9.51	UDUSTUNNFSNCPR-QFNYSWOCSA-N
Halstoctacosanolide A	3	in silico MS2 and RT prediction with MSFINDER and Retip	908.553	[M+ACN+Na]+	11.09	GQHNSYURZJAIPC-IFGCVEQJNA-N
UNPD10058	3	in silico MS2 and RT prediction with MSFINDER and Retip	917.494	[M+H-H2O]+	8.42	UFUILWBFXAJLPX-ZWMXCIFXNA-N
UNPD189286	3	in silico MS2 and RT prediction with MSFINDER and Retip	920.559	[M+CH3OH+H]+	10.39	JNXIZNROIJXPTQ-NNPGEZQYNA-N
argeloside C	3	in silico MS2 and RT prediction with MSFINDER and Retip	921.527	[M+H-H2O]+	5.1	SBYKFQMNFNKJPZ-CXTLOLCSSA-N
Aselacin B	3	in silico MS2 and RT prediction with MSFINDER and Retip	923.479	[M+H]+	8.88	YUBIUAUSTIXPQN-UHFFFAOYNA-N
PC(22:5(7Z,10Z,13Z,16Z,19Z)/22:6(4Z,7Z,10Z,13Z,16Z,19Z))	3	in silico MS2 and RT prediction with MSFINDER and Retip	924.55	[M+2Na-H]+	10.01	LIYXTHCSSCAYRI-VYKHTVRDSA-N
Triricinolein	3	in silico MS2 and RT prediction with MSFINDER and Retip	933.778	[M+H]+	12.16	ZEMPKEQAKRGZGQ-YAFIDQONNA-N
PS(22:2(13Z,16Z)/22:4(7Z,10Z,13Z,16Z))	3	in silico MS2 and RT prediction with MSFINDER and Retip	936.57	[M+2Na-H]+	10.43	QIWDDYCBOBWYHF-XMHWUKAXSA-N
Aselacin B	3	in silico MS2 and RT prediction with MSFINDER and Retip	940.515	[M+NH4]+	6.61	YUBIUAUSTIXPQN-UHFFFAOYNA-N
UNPD35114	3	in silico MS2 and RT prediction with MSFINDER and Retip	941.489	[M+H-2H2O]+	8.33	MNNISJNIBQSTOR-AKJPWTAENA-N
Withanoside VIII	3	in silico MS2 and RT prediction with MSFINDER and Retip	945.47	[M+H]+	6.61	DBAUCVYBKAWXNM-CHCVKOMTNA-N
UNPD172876	3	in silico MS2 and RT prediction with MSFINDER and Retip	949.504	[M+ACN+Na]+	5.84	YIKWIQAIKGWYCF-QZYBIKDYNA-N
UNPD77344	3	in silico MS2 and RT prediction with MSFINDER and Retip	952.643	[M+NH4]+	8.4	ZQZGNHIPULQVSN-RLVXPAHQNA-N
Triricinolein	3	in silico MS2 and RT prediction with MSFINDER and Retip	955.76	[M+Na]+	12.14	ZEMPKEQAKRGZGQ-YAFIDQONNA-N
UNPD19533	3	in silico MS2 and RT prediction with MSFINDER and Retip	956.51	[M+K]+	6.2	WOEWBNNGDMOZJK-AHOLNLCFNA-N
Soyasaponin gamma-G	3	in silico MS2 and RT prediction with MSFINDER and Retip	961.466	[M+K]+	6.2	OJLGASCOGOIOJR-UHFFFAOYNA-N
Yokonolide A	3	in silico MS2 and RT prediction with MSFINDER and Retip	968.639	[M+2ACN+H]+	7.26	FDTRCZDJIYMYRH-BPQWXGEUNA-N
Soyasaponin I methyl ester	3	in silico MS2 and RT prediction with MSFINDER and Retip	974.577	[M+NH4]+	4.71	ZEIAROWTCSYWFT-UIADHOMFNA-N
Cyanopeptolin D	3	in silico MS2 and RT prediction with MSFINDER and Retip	989.601	[M+CH3OH+H]+	7.89	DXELFTOXIMDPAT-UHFFFAOYNA-N
microcystin-LR	3	in silico MS2 and RT prediction with MSFINDER and Retip	995.558	[M+H]+	8.86	ZYZCGGRZINLQBL-GWRQVWKTSA-N
UNPD27596	3	in silico MS2 and RT prediction with MSFINDER and Retip	996.592	[M+NH4]+	8.48	DZPCPXVZJPZXFD-DLCJJKGDNA-N
UNPD27596	3	in silico MS2 and RT prediction with MSFINDER and Retip	1001.55	[M+Na]+	8.48	DZPCPXVZJPZXFD-DLCJJKGDNA-N
UNPD140373	3	in silico MS2 and RT prediction with MSFINDER and Retip	1001.56	[M+H]+	11.08	PYWZIJRXFZSBAC-IZRGQHLFNA-N
UNPD149827	3	in silico MS2 and RT prediction with MSFINDER and Retip	1007.61	[M+CH3OH+H]+	7.56	OJPMNLJZJIAKSU-FTHLISKQNA-N
UNPD137315	3	in silico MS2 and RT prediction with MSFINDER and Retip	1009.61	[M+H]+	8.19	CLMLMDWGRCAWGP-RWWDCJNENA-M
Ritterazine E	3	in silico MS2 and RT prediction with MSFINDER and Retip	1009.63	[M+2ACN+H]+	8.1	CAXQCKNMQDGMFL-UHFFFAOYNA-N
UNPD179150	3	in silico MS2 and RT prediction with MSFINDER and Retip	1011.62	[M+H]+	8.22	MORXIBFEDIZXAK-NUABIRKANA-N
UNPD103176	3	in silico MS2 and RT prediction with MSFINDER and Retip	1026.72	[M+H-H2O]+	10.68	FNZCYSXFFUOIIL-QDCGRDLKNA-N
UNPD120579	3	in silico MS2 and RT prediction with MSFINDER and Retip	1051.62	[M+H]+	9.9	FKENLMKIJFNLBM-PNWQQHSZNA-N
Matesaponin 2	3	in silico MS2 and RT prediction with MSFINDER and Retip	1081.55	[M+Na]+	5.5	ZGNBKNDOCCHRSM-UHFFFAOYNA-N
Namonin E;(-)-Namonin E	3	in silico MS2 and RT prediction with MSFINDER and Retip	1083.48	[M+K]+	6.89	JNGDBBPABQCYEV-YAVKXCRYNA-N
Capsianoside II	3	in silico MS2 and RT prediction with MSFINDER and Retip	1102.57	[M+NH4]+	6.16	NFBYZSYLZUMCFV-CVVMOWQVNA-N
Massetolide E	3	in silico MS2 and RT prediction with MSFINDER and Retip	1112.67	[M+H]+	10.36	GUMIALLQHODSIG-OEYURBSUNA-N
Capsianoside III	3	in silico MS2 and RT prediction with MSFINDER and Retip	1118.56	[M+NH4]+	5.8	AKJRMUURRHAKDT-DRPMNEMANA-N
UNPD200289	3	in silico MS2 and RT prediction with MSFINDER and Retip	1122.85	[M+H]+	12.16	BUDKJEZKTRMYTO-CHOVQZKWNA-N
Capsianoside III	3	in silico MS2 and RT prediction with MSFINDER and Retip	1123.52	[M+Na]+	5.8	JHLMLCRVDVBIAC-TXGSHTAKNA-N
3beta-[(beta-D-glucopyranosyl)oxy]-17alpha-hydroxy-16beta-[(O-(2-O-3,4,5-trimethoxybenzoyl-beta-D-xylopyranosyl)-(1->3)-2-O-acetyl-alpha-L-arabinopyranosyl)oxy]cholest-5-en-22-one	3	in silico MS2 and RT prediction with MSFINDER and Retip	1127.56	[M+CH3OH+H]+	7.3	FLAULGUSZSPUPV-FDKPUIKUSA-N
Aureobasidin S2a	3	in silico MS2 and RT prediction with MSFINDER and Retip	1155.64	[M+K]+	4.96	AZWNOPVZWSHWAA-UHFFFAOYNA-N
UNPD101772	3	in silico MS2 and RT prediction with MSFINDER and Retip	1158.64	[M+NH4]+	7.43	IIBXPWTVQRQSEO-JFSDKDSRNA-N
PIM2(17:0/18:0)	3	in silico MS2 and RT prediction with MSFINDER and Retip	1194.71	[M+NH4]+	5.02	OAPLXIVHZHONPH-LOSQAETFNA-N
Largamide H;(-)-Largamide H	3	in silico MS2 and RT prediction with MSFINDER and Retip	1199.66	[M+H]+	5.02	YRCPTMBCIKDNMH-ZSTMFPCBNA-N
Celogentin J	3	in silico MS2 and RT prediction with MSFINDER and Retip	1201.6	[M+2Na-H]+	6.11	JXUAEBMHMDKXHH-UHFFFAOYNA-N
UNPD150620	3	in silico MS2 and RT prediction with MSFINDER and Retip	1287.72	[M+Na]+	5.12	ZUDNUEGJIPHGDN-QCRKGOSYNA-N
UNPD16054	3	in silico MS2 and RT prediction with MSFINDER and Retip	1287.74	[M+Na]+	7.7	FLSDUCMOFKMYAW-SLRRICRMNA-N
UNPD61239	3	in silico MS2 and RT prediction with MSFINDER and Retip	1347.77	[M+Na]+	5.39	MJDCFFKWAIZXPE-SRHIUZMRNA-N
UNPD29841	3	in silico MS2 and RT prediction with MSFINDER and Retip	1395.73	[M+Na]+	7.82	OVTBGUGBJPKUEG-HUGJQXBKNA-N
UNPD108384	3	in silico MS2 and RT prediction with MSFINDER and Retip	1404.79	[M+NH4]+	8.6	HEGBNMAHVDMZEY-JQMXKEEPNA-N
PIM4(18:1(9Z)/14:0)	3	in silico MS2 and RT prediction with MSFINDER and Retip	1439.72	[M+H-H2O]+	6.86	MENRSQMXLZVPNJ-BTMGXHLSNA-N
PIM4(18:0/14:0)	3	in silico MS2 and RT prediction with MSFINDER and Retip	1441.74	[M+H-H2O]+	6.72	KPSAUYDRFVIHER-DFYVJYBZNA-N
UNPD144050	3	in silico MS2 and RT prediction with MSFINDER and Retip	1527.72	[M+CH3OH+H]+	7.76	LUPZSKBEZGFRBB-KJLPVTLGNA-N

## Sheet: Leaves_43DAT
Compound.Name	InChiKeys	Pubchem.ID	SMILES	pvalue	foldchange	CID	ClusterNumber	xlogp	ClusterLabel	TreeLabels
Spermidine	ATHGHQPFGPMSJY-UHFFFAOYSA-N	1102	C(CCNCCCN)CN	9.1e-05	6	1102	120	-0.654	Putrescine
Heptanenitrile	SDAXRHHPNYTELL-UHFFFAOYSA-N	12372	CCCCCCC#N	7.3e-05	5.1	12372	121	2.56
Zwiebelane B	MDLUYFYDCNUJHX-UHFFFAOYNA-N	85447653	CC1C(C2SC1S2=O)C	0.00011	2.3	85447653	119	0.045	Azabicyclo Compounds
Arginine	ODKSFYDXXFIFQN-BYPYZUCNSA-N	6322	C(C[C@@H](C(=O)O)N)CN=C(N)N	1.2e-05	0.87	6322	75	-3.585	Amino Acids	a
Tetrahydrofolic acid	MSTNYGQPCMXVAQ-PXYINDEMSA-N	135444742	C1C(NC2=C(N1)N=C(NC2=O)N)CNC3=CC=C(C=C3)C(=O)N[C@@H](CCC(=O)O)C(=O)O	1.9e-05	0.76	135444742	81	-3.822	Tetrahydrofolates
L-trans-5-Hydroxy-2-piperidinecarboxylic acid	RKEYKDXXZCICFZ-UHFFFAOYNA-N	151730	C1CC(NCC1O)C(=O)O	9.7e-05	1.5	151730	18	-0.428	Piperidines	b
L-Valine	KZSNJWFQEVHDMF-SGAVLPGINA-N	6287	CC(C)[C@@H](C(=O)O)N	4.6e-05	0.83	6287	62	-2.169	Amino Acids
2-Amino-3-carboxymuconic acid semialdehyde	KACPVQQHDVBVFC-OIFXTYEKSA-N	5280673	C(=C\C(=C(/C(=O)O)\N)\C(=O)O)\C=O	0.00011	1.3	5280673	118	-3.188		c
2-Thiophenecarboxaldehyde	CNUDBTRUORMMPA-UHFFFAOYSA-N	7364	C1=CSC(=C1)C=O	4.4e-05	0.66	7364	73	0.78	Thiophenes	d
N,N'-Bis(gamma-glutamyl)cystine	GOZJYXJJQVGDOJ-UHFFFAOYNA-N	440072	C(CC(=O)NC(CSSCC(C(=O)O)NC(=O)CCC(C(=O)O)N)C(=O)O)C(C(=O)O)N	0.024	0.21	440072	11	-4.966	Dipeptides	e
2'-Deoxymugineic acid	CUZKLRTTYZOCSD-UHFFFAOYNA-N	189811	C1CN([C@@H]1C(=O)O)CC[C@@H](C(=O)O)NCC[C@@H](C(=O)O)O	6.7e-05	0.87	189811	113	-1.713
3,3',4-Tri-O-methylflavellagic acid	BLICLJSLKJVPKA-UHFFFAOYSA-N	14412544	COC1=C(C=C2C3=C1OC(=O)C4=C3C(=C(C(=C4O)OC)OC)OC2=O)O	0.0039	1.2	14412544	1	1.39	Coumarins
Apigenin 7-sulfate	UQUHXFINOFUDCC-UHFFFAOYSA-N	14016776	C1=CC(=CC=C1C2=CC(=O)C3=C(C=C(C=C3O2)OS(=O)(=O)O)O)O	0.00015	0.75	14016776	7	-0.708	Flavonoids
Stachyose	UQZIYBXSHAGNOE-CYDMKDQUNA-N	439531	C([C@@H]1[C@@H]([C@@H]([C@H]([C@H](O1)OC[C@@H]2[C@@H]([C@@H]([C@H]([C@H](O2)OC[C@@H]3[C@H]([C@@H]([C@H]([C@H](O3)O[C@]4([C@H]([C@@H]([C@H](O4)CO)O)O)CO)O)O)O)O)O)O)O)O)O)O	8.2e-05	4	439531	20	-6.351	Oligosaccharides	f
Salvianolic acid K	AZOCLKLJIKZOLF-KTLDLXQWNA-N	10482829	C1=CC(=C(C=C1C[C@H](C(=O)O)OC(=O)/C=C/C2=CC(=C(C=C2)O[C@H]([C@@H](C3=CC(=C(C=C3)O)O)O)C(=O)O)O)O)O	4.8e-05	1.3	10482829	94	1.075	Cinnamates
oxytetracycline	IWVCMVBTMGNXQD-PXOLEDIWSA-N	54675779	C[C@@]1([C@H]2[C@@H]([C@H]3[C@@H](C(=O)C(=C([C@]3(C(=O)C2=C(C4=C1C=CC=C4O)O)O)O)C(=O)N)N(C)C)O)O	0.00024	1.6	54675779	42	-1.779	Tetracyclines	g
Viscutin 1	TXPZFODNQVHXLF-SLBHPWMWNA-N	44257191	C1CC2=C(C=C(C=C2O[C@H]3C([C@H]([C@@H](CO3)O)O)OC(=O)C4=CC=C(C=C4)O)O)O[C@@H]1C5=CC(=C(C=C5)O)O	8.4e-05	3.1	44257191	60	1.478	Glucosides
Adenine	GFFGJBXGBJISGV-UHFFFAOYSA-N	190	C1=NC2=NC=NC(=C2N1)N	0.0057	1.5	190	38	-1.287	Purines	h
MMV687248	PWAACAMQKVIVPZ-UHFFFAOYSA-N	70687214	C1=CC(=CC=C1OC2=CN=CC(=C2)C3=CC4=C(C=C3)N=C(N4)N)F	0.00011	3.4	70687214	35	1.19
L-Tyrosine	OUYCCCASQSFEME-QMMMGPOBSA-N	6057	C1=CC(=CC=C1C[C@@H](C(=O)O)N)O	0.0091	2.9	6057	87	-2.711	Amino Acids, Aromatic
Diospyrin	XCZZWPJIGBONJX-UHFFFAOYNA-N	308140	CC1=CC2=C(C(=C1)O)C(=O)C=C(C2=O)C3=C(C4=C(C=C3C)C(=O)C=CC4=O)O	0.05	0.64	308140	66	0.516	Naphthoquinones	i
4-Hydroxymandelonitrile	FFEARJCKVFRZRR-BYPYZUCNSA-N	166768	C1=CC(=CC=C1C(C#N)O)O	0.00039	1.4	166768	6	-0.763	Phenols
Pantothenic acid	GHOKWGTUZJEAQD-UHFFFAOYSA-N	6613	CC(C)(CO)[C@H](C(=O)NCCC(=O)O)O	7e-05	3	6613	113	-1.343	beta-Alanine
S-Lactoylglutathione	VDYDCVUWILIYQF-CSMHCCOUSA-N	119450	CC(C(=O)SC[C@@H](C(=O)NCC(=O)O)NC(=O)CC[C@@H](C(=O)O)N)O	0.048	0.62	119450	11	-4.987	Dipeptides	e
NAD	LFERELMXERXKKQ-KMXXXSRASA-N	5892	C1=CC(=C[N+](=C1)[C@H]2[C@@H]([C@@H]([C@H](O2)COP(=O)([O-])OP(=O)(O)OC[C@@H]3[C@H]([C@H]([C@@H](O3)N4C=NC5=C(N=CN=C54)N)O)O)O)O)C(=O)N	5.5e-05	4.4	5892	70	-6.261	Adenine Nucleotides
Coumarin	ZYGHJZDHTFUPRJ-UHFFFAOYSA-N	323	C1=CC=C2C(=C1)C=CC(=O)O2	0.00056	0.82	323	73	1.022	Coumarins	d
11-Hydroxy-9-tridecenoic acid	NSVPCFNUUARRKL-CSKARUKUNA-N	5318367	CCC(/C=C/CCCCCCCC(=O)O)O	0.002	2.3	5318367	57	3.528	DiHODE
Pyridoxal 5'-phosphate	NGVDGCNFYWLIFO-UHFFFAOYSA-N	1051	CC1=NC=C(C(=C1O)C=O)COP(=O)(O)O	0.023	4	1051	19	-1.983	Pyridoxal
2,4,6-Octatriyn-1-ol	CDDRQTICNABTAT-UHFFFAOYSA-N	11679812	CC#CC#CC#CCO	0.0086	1.8	11679812	121	1.688
1,3-Diphenethylurea	VMQLWVGHPWFHEI-UHFFFAOYSA-N	95244	C1=CC=C(C=C1)CCNC(=O)NCCC2=CC=CC=C2	0.00011	3.4	95244	44	2.694	Dipeptides
3,4-Dihydroxy-L-phenylalanine	WTDRDQBEARUVNC-LURJTMIESA-N	6047	C1=CC(=C(C=C1C[C@@H](C(=O)O)N)O)O	0.046	12	6047	87	-2.363	Amino Acids, Aromatic
Cycloserine	DYDCUQKUCUHJBH-RUOZJJLTNA-N	6234	C1[C@H](C(=O)NO1)N	8.9e-05	3.3	6234	75	-0.915	Oxazolidinones	a
Methyl 3,4,6-tri-O-galloyl-beta-D-glucopyranoside	DXMITXYQZDSXOV-UHFFFAOYNA-N	13270027	COC1C(C(C(C(O1)COC(=O)C2=CC(=C(C(=C2)O)O)O)OC(=O)C3=CC(=C(C(=C3)O)O)O)OC(=O)C4=CC(=C(C(=C4)O)O)O)O	0.00058	5.6	13270027	60	2.458	Glucosides
Guanine	DRAVOWXCEBXPTN-UHFFFAOYSA-N	135398634	C1=NC2=C(N1)C(=O)NC(=N2)N	4.8e-05	3.4	135398634	38	-0.763	Hypoxanthines	h
Sorbitan laurate	LWZFANDGMFTDAV-UHFFFAOYNA-N	14926	CCCCCCCCCCCC(=O)OCC([C@@H]1[C@H]([C@@H](CO1)O)O)O	9.3e-05	3.3	14926	16	4.094	EpETrE	j
S-(2-Methylpropionyl)-dihydrolipoamide-E	UEFURMXXHJCLJP-UHFFFAOYNA-N	11953835	CC(C)C(=O)SCCC(CCCCC(=O)N)S	1.5e-05	1.3	11953835	11	1.972		e
GUANOSINE	NYHBQMYGNKIUIF-SBTUYZBDNA-N	135398635	C1=NC2=C(N1[C@H]3[C@@H]([C@@H]([C@H](O3)CO)O)O)N=C(NC2=O)N	7.4e-05	2.7	135398635	17	-2.272	Purine Nucleosides	k
9-Hydroxy-10-epi-ryanodine	REYPEWVSBJSDJC-OFOHABJSNA-N	100991758	CC(C)[C@]1([C@H]([C@]2([C@]3(C[C@]4([C@@]1([C@@]2([C@@]5([C@@]3(CC[C@@]([C@@H]5O)(C)O)O)O4)O)C)O)C)O)OC(=O)C6=CC=CN6)O	9.8e-05	1.2	100991758	30	-0.32	Diterpenes
4-Hydroxyquinoline	FGYQUFZANKOISC-UHFFFAOYNA-N	69141	C1=CC=C2C(=C1)C(=O)C=CN2	9.1e-05	3.1	69141	89	1.037	Indoles	l
Indole-3-acetamide	ZOAMBXDOGPRZLP-UHFFFAOYSA-N	397	C1=CC=C2C(=C1)C(=CN2)CC(=O)N	4.1e-05	3.4	397	84	0.077	Indoles	m
D-(+)-Glucosamine	MSWZFWKMSRAUBD-IVMDWMLBSA-N	439213	C([C@@H]1[C@H]([C@@H]([C@H](C(O1)O)N)O)O)O	2.6e-05	1.3	439213	117	-1.764	Hexosamines
Indole-3-carbinol	APEJMQOBVMLION-UHFFFAOYSA-N	3712	C1=CC=C2C(=C1)C(=CN2)CO	7.4e-05	3.4	3712	29	0.996	Indoles	n
5,6-Epoxy-5,6-dihydro-10'-apo-b,y-carotene-3,10'-diol	GMQZSQMIENYQEB-AFMCRXATNA-N	131752517	C/C(=C/C=C/C=C(\C)/C=C/C=C(/C)\C=C\C12C(CC(CC1(O2)C)O)(C)C)/C=C\CO	1.2e-05	0.15	131752517	8	5.747	Carotenoids	o
Rehmaglutin A	QMQZZRSFTSGWJA-GRLMZUJMNA-N	5320903	C1CO[C@H]2[C@H]3[C@@H]1[C@@H]([C@H]([C@]3(CO2)O)O)O	0.00028	1.3	5320903	104	-0.968	Triterpenes	p
5-Thymidylic acid	GYOZYWVXFNDGLU-XLPZGREQSA-N	9700	CC1=CN(C(=O)NC1=O)[C@H]2C[C@@H]([C@H](O2)COP(=O)(O)O)O	9.4e-05	4.1	9700	17	-2.993	Thymine Nucleotides	k
Floribundine	AKXOIHNFHOEPHN-UHFFFAOYNA-N	5319512	CN1CCC2=CC(=C(C3=C2C1CC4=CC=CC=C43)OC)O	0.0058	0.92	5319512	34	1.8	Benzylisoquinolines
NCGC00168877-02_C15H20O8_3-(4-Hydroxyphenyl)-3-oxopropyl beta-D-glucopyranoside	GEVWHIDSUOMVRI-YAWGZTSLNA-N	10471692	C1=CC(=CC=C1C(=O)CCO[C@H]2[C@@H]([C@H]([C@@H]([C@H](O2)CO)O)O)O)O	2.1e-05	1.6	10471692	37	-1.457	Iridoids
INDOLE-3-PYRUVIC ACID	RSTKLPZEZYGQPY-UHFFFAOYSA-M	803	C1=CC=C2C(=C1)C(=CN2)CC(=O)C(=O)O	5.5e-05	1.6	803	52	0.459	Indoles
1-benzofuran-4-ol	CFBCZETZIPZOGW-UHFFFAOYSA-N	11607921	C1=CC(=C2C=COC2=C1)O	6.7e-09	7.1	11607921	7	1.021	Isoflavones
L-kynurenine	YGPSJZOEDVAXAB-QMMMGPOBSA-N	161166	C1=CC=C(C(=C1)C(=O)C[C@@H](C(=O)O)N)N	7.5e-05	3.7	161166	36	-2.868	Amino Acids	q
Phenylalanine	COLNVLDHVKWLRT-QMMMGPOBSA-N	6140	C1=CC=C(C=C1)C[C@@H](C(=O)O)N	7.7e-05	2.8	6140	36	-1.575	Amino Acids, Aromatic	q
Indoline	KRNSYSYRLQDHDK-UHFFFAOYSA-N	10328	C1CNC2=CC=CC=C21	8.1e-05	2.5	10328	44	0.799	Indoles
NCGC00385684-01_C12H16O8_4H-Pyran-4-one, 3-(beta-D-glucopyranosyloxy)-2-methyl-	WXTPOHDTGNYFSB-UHFFFAOYNA-N	5316639	CC1=C(C(=O)C=CO1)O[C@H]2[C@@H]([C@H]([C@@H]([C@H](O2)CO)O)O)O	2e-06	1.5	5316639	1	-0.828	Pyrones
Bis-N-butyl phthalate	GTQXJGMYZPFFKR-UHFFFAOYNA-N	78385899	CCOC(=O)NCC1=CC=C(C=C1)OC2C(C(C(C(O2)C)OC(=O)C)OC(=O)C)OC(=O)C	0.0017	1.2	78385899	114	1.441
Trans-Zeatin-9-glucoside	VYRAJOITMBSQSE-GIHYWFGSSA-N	9842892	C/C(=C\CNC1=C2C(=NC=N1)N(C=N2)[C@H]3[C@@H]([C@H]([C@@H]([C@H](O3)CO)O)O)O)/CO	0.0062	1.1	9842892	17	-2.405	Ribonucleosides	k
Scupontin B	LSEZGUSNRPXEKV-CKKZYBLGNA-N	10507887	C[C@@H]1C[C@@H]([C@@]2([C@@H]([C@@]1(C)[C@@H]3C[C@H]4C=CO[C@H]4O3)CCC[C@]25CO5)COC(=O)C[C@H](C)OC(=O)C[C@H](C)OC(=O)C)OC(=O)C	0.038	14	10507887	112	4.32	Triterpenes	r
4-Hydroxybenzoylcholine	BAPAICNRGIBFJT-UHFFFAOYSA-O	151252	C[N+](C)(C)CCOC(=O)C1=CC=C(C=C1)O	0.046	2.6	151252	102	0.251		s
Capillin	RAZOKRUZEQERLH-UHFFFAOYSA-N	10321	CC#CC#CC(=O)C1=CC=CC=C1	0.032	3.2	10321	28	2.738	Diynes	t
Gibberellin A81	BKBYHSYZKIAJDA-UHFFFAOYNA-N	4658943	CC12CC(CC3(C1C(C45C3CCC(C4)(C(=C)C5)O)C(=O)O)OC2=O)O	0.0011	10	4658943	10	-0.304	Gibberellins
(R)C(R)S-S-Propylcysteine sulfoxide	JZKMSAGUCSIIAH-UHFFFAOYNA-N	350625	CCCS(=O)CC(C(=O)O)N	4.9e-05	2.2	350625	62	-3.524
Trans-Zeatin	UZKQTCBAMSWPJD-FARCUNLSSA-N	449093	C/C(=C\CNC1=NC=NC2=C1NC=N2)/CO	8.2e-05	2.2	449093	38	-1.082	Cytokinins	h
Neuromedin N (1-4)	SKGLAZSLOGYCCA-PEFXOJROSA-N	53481582	CC[C@@H](C)[C@H](C(=O)N1CCC[C@H]1C(=O)N[C@@H](CC2=CC=C(C=C2)O)C(=O)N[C@H]([C@H](C)CC)C(=O)O)N	0.017	1.3	53481582	9	-0.944	Oligopeptides
N-a-Acetylcitrulline	WMQMIOYQXNRROC-UHFFFAOYNA-N	11506771	CC(=O)NC(CCCNC(=O)N)C(=O)O	0.0029	1.3	11506771	11	-1.467	Dipeptides	e
Officinoside C	OFIPMYQXNOJVMT-QNXZGNTKNA-N	10962618	C[C@@H]1[C@@H]([C@@H]([C@H]([C@@H](O1)OC(C)(C)[C@@H]2CC[C@]3(CC[C@@H](C(=C)C3C2)O[C@H]4[C@@H]([C@H]([C@@H]([C@H](O4)CO)O)O)O)C)O)O)O	0.027	3.3	10962618	15	1.287	Diterpenes	u
Cichorioside D	AIDJHLWRZXMPHP-OLGSXGAXNA-N	102476811	C[C@H]1[C@@H]2CCC(=C3[C@@H]([C@H]2OC1=O)C(=CC3=O)CO[C@H]4[C@@H]([C@H]([C@@H]([C@H](O4)CO[C@H]5[C@@H]([C@@H]([C@H]([C@@H](O5)C)O)O)O)O)O)O)C	9.8e-05	3	102476811	39	-2.059	Monoterpenes
Skullcapflavone I 2'-(2''-E-cinnamoylglucoside)	FOWHMJBXCXWUGU-ZVAYBFPUNA-N	44258550	COC1=C(C2=C(C(=C1)O)C(=O)C=C(O2)C3=CC=CC=C3O[C@H]4C([C@H]([C@@H](C(O4)CO)O)O)OC(=O)/C=C/C5=CC=CC=C5)OC	6.5e-05	87	44258550	1	2.882	Flavonoids
5'-S-Methylthioadenosine	WUUGFSXJNOTRMR-IOSLPCCCSA-N	439176	CSC[C@@H]1[C@H]([C@H]([C@@H](O1)N2C=NC3=C(N=CN=C32)N)O)O	0.0017	0.86	439176	17	-1.051	Deoxyadenosines	k
Indole	SIKJAQJRHWYJAI-UHFFFAOYSA-N	798	C1=CC=C2C(=C1)C=CN2	7.4e-05	3.6	798	29	1.423	Indoles	n
Tryptophan	QIVBCDIJIAJPQS-VIFPVBQESA-N	6305	C1=CC=C2C(=C1)C(=CN2)C[C@@H](C(=O)O)N	3.3e-05	3.5	6305	52	-2.023	Amino Acids, Aromatic
3-Formylindole	OLNJUISKUQQNIM-UHFFFAOYSA-N	10256	C1=CC=C2C(=C1)C(=CN2)C=O	4.3e-05	3.9	10256	89	1.466	Indoles	l
2-Methylindole	CVSVTCORWBXHQV-UHFFFAOYSA-N	7224	CC1=CC2=CC=CC=C2N1	6.2e-05	3.6	7224	29	1.659	Indoles	n
Di-2-propenyl sulfide	UBJVUCKUDDKUJF-UHFFFAOYSA-N	11617	C=CCSCC=C	3.1e-06	1.5	11617	119	2.011	Allyl Compounds
Atrazine-Desethyl	PLVPPLCLBIEYEA-WAYWQWQTSA-N	22563	CC(C)NC1=NC(=NC(=N1)N)Cl	3.5e-05	3.2	22563	120	-0.131	Atrazine
(+)-Staurosporine	HKSZLNNOFSGOKW-YQMWWAPPNA-N	44259	C[C@@]12[C@@H]([C@@H](C[C@@H](O1)N3C4=CC=CC=C4C5=C6C(=C7C8=CC=CC=C8N2C7=C53)CNC6=O)NC)OC	7.1e-05	3.7	44259	70	2.401	Carbazoles
Ala-Phe	LVWYJBNMIMPTHU-SNAWJCMRSA-N	96814	C[C@@H](C(=O)N[C@@H](CC1=CC=CC=C1)C(=O)O)N	6.4e-05	3.7	96814	36	-1.877	Dipeptides	q
Isopimaric acid	MXYATHGRPJZBNA-UHFFFAOYNA-N	442048	C[C@@]1(CC[C@H]2C(=CC[C@@H]3[C@@]2(CCC[C@@]3(C)C(=O)O)C)C1)C=C	0.0025	3	442048	10	6.316	Phenanthrenes
N6-Threonylcarbamoyladenosine	YCIAHAYEVBEGKT-UHFFFAOYNA-N	161466	C[C@H]([C@@H](C(=O)O)NC(=O)NC1=C2C(=NC=N1)N(C=N2)[C@H]3[C@@H]([C@@H]([C@H](O3)CO)O)O)O	7e-05	3	161466	17	-3.42	Purine Nucleosides	k
6''-O-Acetylholocalin	NIVXKMKLZUXGSY-UHFFFAOYNA-N	131751960	CC(=O)OCC1C(C(C(C(O1)OC(C#N)C2=CC(=CC=C2)O)O)O)O	0.00012	2.6	131751960	37	-1.56	Iridoids
FAD	VWWQXMAJTJZDQX-UYBVJOGSSA-N	643975	CC1=CC2=C(C=C1C)N(C3=NC(=O)NC(=O)C3=N2)C[C@@H]([C@@H]([C@@H](COP(=O)(O)OP(=O)(O)OC[C@@H]4[C@H]([C@H]([C@@H](O4)N5C=NC6=C(N=CN=C65)N)O)O)O)O)O	5.6e-05	1.7	643975	70	-6.285	Riboflavin
Artonin F	GKWNQOINHKVKOT-UHFFFAOYNA-N	14680593	CC(=CCC1=C2C(=C3C(=C1O)C(=O)C4=C(O3)C5=C6C(C4)C(OC6=C(C=C5O)O)(C)C)C=CC(O2)(C)C)C	0.00021	2.8	14680593	1	4.434	Flavonoids
6-Oxocamphor	DGHHQBMTXTWTJV-BQAIUKQQSA-N	382555	CC1(C2CC(=O)C1(C(=O)C2)C)C	0.00019	2.4	382555	43	1.096
10-Hydroxy-3-methoxy-1,3,5,7-cadinatetraen-9-one	VMEKKHYIQYOLHA-UHFFFAOYNA-N	3504625	CC1=CC2=C(C=C1OC)C(C(=O)C=C2C(C)C)(C)O	0.00011	2.8	3504625	106	2.078	Naphthols
Koumine	UBMDAKWARMURDL-FNORWQNLSA-N	91895267	CN1C[C@]2([C@@H]3C[C@@H]4C5=NC6=CC=CC=C6[C@]52C[C@H]1[C@H]3CO4)C=C	0.00015	1.2	91895267	79	1.16	Indoles	v
Swiemahogin A	AXPQVXURTHIQGM-IZQLNBHXNA-N	101432180	C[C@]1(CC[C@@H]([C@@]2([C@]1(CC(=O)O2)O)C)[C@]3(C=CC(=O)C([C@@H]3CC(=O)OC)(C)C)C)[C@@H](C4=COC=C4)O	8.1e-05	3.7	101432180	58	2.073	Diterpenes	w
Toonaciliatin D	UFZHJXOBYWWVDW-JFZQRYCFNA-N	23624916	C[C@@]12C[C@@H]3[C@@H]4[C@]([C@@H](CC(=O)O[C@]4([C@@]15[C@H](O5)C[C@H]2C6=COC=C6)C)C(C)(C)O)([C@H](O3)CC(=O)OC)C	0.003	1.1	23624916	88	2.08	Limonins
Myricatomentoside I	RALVCBWUWHJOGL-UHFFFAOYNA-N	85261151	COC1=C2C=CC(=C1OC3C(C(C(C(O3)CO)O)O)O)CCCCC(=O)CCC4=CC(=C(C=C4)O)O2	4.7e-10	12	85261151	59	0.887	Lignans
4-Caffeoylquinic acid	GYFFKZTYYAFCTR-PCEXOASVNA-N	9798666	C1[C@H](C([C@@H](CC1(C(=O)O)O)O)OC(=O)/C=C/C2=CC(=C(C=C2)O)O)O	4.9e-09	12	9798666	94	-1.129	Caffeic Acids
Buntansin A	GQYZDAIERJIQDI-UHFFFAOYSA-N	15627934	COC1=C(C=C2C=CC(=O)OC2=C1)C(=O)O	2.5e-08	2.5	15627934	7	0.584	Coumarins
Bakkenolide D	LWHLMCCRIWZBQO-CMDGGOBGNA-N	12299954	C[C@H]1CC[C@@H]([C@H]2[C@@]1(C[C@]3([C@@H]2OC(=O)C)C(=C)COC3=O)C)OC(=O)/C=C\SC	3.2e-05	0.84	12299954	10	4.124
NCGC00385086-01_C19H28O10_2-Phenylethyl 2-O-[(2S,3R,4R)-3,4-dihydroxy-4-(hydroxymethyl)tetrahydro-2-furanyl]-beta-D-glucopyranoside	ZRGXCWYRIBRSQA-UHFFFAOYNA-N	10993414	C1[C@@]([C@H]([C@@H](O1)O[C@@H]2[C@H]([C@@H]([C@H](O[C@H]2OCCC3=CC=CC=C3)CO)O)O)O)(CO)O	0.041	1	10993414	37	-1.272	Disaccharides
Sativic acid	VJOGZGLNDROOFS-UHFFFAOYNA-N	92800	CCCCCC(C(CC(C(CCCCCCCC(=O)O)O)O)O)O	2e-05	1.4	92800	16	2.689	OH-FA_18_0_4	j
Tiglylcarnitine	WURBQCVBQNMUQT-NJUMROAHNA-N	22833596	C/C=C(\C)/C(=O)OC(CC(=O)[O-])C[N+](C)(C)C	0.00072	1.1	22833596	118	-0.004		c
2-Dodecylbenzenesulfonic acid	WBIQQQGBSDOWNP-UHFFFAOYSA-N	25457	CCCCCCCCCCCCC1=CC=CC=C1S(=O)(=O)O	7.3e-05	3.4	25457	28	5.911	Benzenesulfonates	t
Xanthoangelol F	XBFSDEKOTLYPJU-SXZUIPJJSA-N	6479088	CC(=CCC/C(=C/CC1=C(C=CC(=C1O)C(=O)/C=C/C2=CC=C(C=C2)O)OC)/C)C	0.0071	1.1	6479088	7	5.435	Flavonoids
Sinapine	HUJXHFRXWWGYQH-UHFFFAOYSA-O	5280385	C[N+](C)(C)CCOC(=O)/C=C/C1=CC(=C(C(=C1)OC)O)OC	3.2e-09	15	5280385	102	1.003		s
Citrinin	CQIUKKVOEOPUDV-IYSWYEEDSA-N	54680783	C[C@@H]1[C@H](OC=C2C1=C(C(=C(C2=O)C(=O)O)O)C)C	7.4e-09	12	54680783	74	1.62	Benzopyrans
4',7-Dihydroxy-2'-methoxy-3'-prenylisoflavan	ZEJRFMCOSHZBRD-UHFFFAOYNA-N	44257507	CC(=CCC1=C(C=CC(=C1OC)C2CC3=C(C=C(C=C3)O)OC2)O)C	6.1e-05	1.5	44257507	99	3.045	Isoflavones
3a,21-Dihydroxy-5b-pregnane-11,20-dione	XWYBFXIUISNTQG-XPYNSANSSA-N	44263347	C[C@]12CC[C@H](C[C@H]1CC[C@@H]3[C@@H]2C(=O)C[C@]4([C@H]3CCC4C(=O)CO)C)O	7.1e-05	14	44263347	13	2.563	11-Hydroxycorticosteroids	x
Sophorasine A	TYNIDTXHMHOCQE-BLASDBQBNA-N	101599922	C[C@@H](C(=O)CN1C[C@@H]2C[C@H](C1)C3=CC=CC(=O)N3C2)O	3.8e-06	1.6	101599922	19	-0.876
(2xi,6xi)-7-Methyl-3-methylene-1,2,6,7-octanetetrol	GGDOZDCNLKHEMH-UHFFFAOYNA-N	15382184	CC(C)(C(CCC(=C)C(CO)O)O)O	0.0089	1.1	15382184	68	-0.955		z
Cyanidin-3-O-sambubioside-5-O-glucoside	RAHCBDLMLRVOBZ-UHFFFAOYNA-O	74976933	C1C(C(C(C(O1)OC2C(C(C(OC2OC3=C([O+]=C4C=C(C=C(C4=C3)OC5C(C(C(C(O5)CO)O)O)O)O)C6=CC(=C(C=C6)O)O)CO)O)O)O)O)O	0.00095	3.5	74976933	1	-1.939	Anthocyanins
D8'-Merulinic acid C	NRSDQEWAMHRTMK-MDZDMXLPSA-N	5319373	CCCCCCCC/C=C/CCCCCCCC1=C(C(=CC=C1)O)C(=O)O	2.1e-06	1.7	5319373	66	9.783	Salicylates	i
NCGC00385291-01_C19H30O8_3-Buten-2-one, 4-[4-(beta-D-glucopyranosyloxy)-2-hydroxy-2,6,6-trimethylcyclohexylidene]-	SWYRVCGNMNAFEK-AATRIKPKNA-N	45783010	CC(=O)C=C=C1C(CC(CC1(C)O)O[C@H]2[C@@H]([C@H]([C@@H]([C@H](O2)CO)O)O)O)(C)C	0.006	1.1	45783010	67	1.223	Norisoprenoids
Santene	LSIXBBPOJBJQHN-UHFFFAOYNA-N	10720	CC1=C(C2CCC1C2)C	0.05	1.1	10720	40	3.121		A
L-Isoleucine	AGPKZVBTJJNPAG-WHFBIAKZSA-N	6306	CC[C@H](C)[C@@H](C(=O)O)N	0.0007	1.1	6306	62	-1.6	Amino Acids
Rosefuran	UTSGPHXOHJSDBC-UHFFFAOYSA-N	84825	CC1=C(OC=C1)CC=C(C)C	0.005	1.1	84825	73	2.357	Furans	d
NCGC00380213-01_C19H32O8_2-Butanone, 4-[3-(beta-D-glucopyranosyloxy)-4-hydroxy-2,6,6-trimethyl-1-cyclohexen-1-yl]-	QFTPTUOKFIIFJH-AATRIKPKNA-N	51136431	CC1=C(C(CC(C1O[C@H]2[C@@H]([C@H]([C@@H]([C@H](O2)CO)O)O)O)O)(C)C)CCC(=O)C	0.00028	1.1	51136431	67	-1.017	Norisoprenoids
cathestatin B	JAJMETBQBCMJSZ-IGYFNUTDNA-N	21597398	C1=CC(=CC=C1C[C@@H](C(=O)NCCCCN)NC(=O)[C@@H]2[C@H](O2)C(=O)O)O	8.6e-05	3	21597398	9	-1.679	Epoxy Compounds
7-Methylrosmanol	XNPVHIQPSAZTLC-UHFFFAOYNA-N	9950773	CC(C)C1=C(C(=C2C(=C1)C(C3C4C2(CCCC4(C)C)C(=O)O3)OC)O)O	0.015	0.93	9950773	106	4.386	Diterpenes, Abietane
Delphinidin-3-O-sambubioside	TWYYVOVDSNRIJM-UHFFFAOYNA-O	74977035	C1C(C(C(C(O1)OC2C(C(C(OC2OC3=CC4=C(C=C(C=C4[O+]=C3C5=CC(=C(C(=C5)O)O)O)O)O)CO)O)O)O)O)O	0.0072	2.3	74977035	1	-0.285	Anthocyanins
NCGC00384740-01_C21H34O9_2(1H)-Azulenone, 6-(beta-D-glucopyranosyloxy)-4,5,6,7,8,8a-hexahydro-5-hydroxy-5-(1-hydroxy-1-methylethyl)-3,8-dimethyl-	ZKDJPRDXYUPPEK-KIVLJSFPNA-N	51136495	CC1CC(C(CC2=C(C(=O)CC12)C)(C(C)(C)O)O)O[C@H]3[C@@H]([C@H]([C@@H]([C@H](O3)CO)O)O)O	9.3e-05	3.5	51136495	39	-1.307	Monoterpenes
Gibberellin A36	JZBLVVPDEDCVQA-WUAMTQAGNA-N	443455	C[C@]1([C@H](CC[C@@]2([C@@H]1[C@@H]([C@]34[C@H]2CC[C@H](C3)C(=C)C4)C(=O)O)C=O)O)C(=O)O	3.5e-06	1.4	443455	10	2.009	Gibberellins
Brianodin B	WRMRTVQZNMWLDP-NCCFVTSUNA-N	24862327	C/C/1=C/[C@H]2[C@]([C@H]([C@@H]3[C@](C=C[C@H]([C@@]3(C)O)OC(=O)C)([C@@H]([C@@H]([C@H]1OC(=O)C)O)OC(=O)C)C)OC(=O)C)([C@](C(=O)O2)(C)O)O	1.1e-05	1.1	24862327	55	0.059	Diterpenes
5,7-Dihydroxy-3',4'-dimethoxy-8-(3-hydroxy-3-methylbutyl)-isoflavone 7-glucoside	AQOVBCDOFOOETK-QERVRDGFNA-N	10793018	CC(C)(CCC1=C(C=C(C2=C1OC=C(C2=O)C3=CC(=C(C=C3)OC)OC)O)O[C@H]4[C@@H]([C@H]([C@@H]([C@H](O4)CO)O)O)O)O	2.1e-06	1.4	10793018	1	0.835	Flavonoids
Glabrescione B	RHXDATRKLOYVTC-UHFFFAOYSA-N	44257338	CC(=CCOC1=C(C=C(C=C1)C2=COC3=C(C2=O)C(=CC(=C3)OC)OC)OCC=C(C)C)C	0.00012	3	44257338	53	4.648	Isoflavones
NP-000062(6)	MMDUKUSNQNWVET-UHFFFAOYNA-N	137832344	C1=CC(=CC=C1C2=CC(=O)C3=C(C(=C(C(=C3O2)C4[C@@H]([C@H]([C@@H]([C@H](O4)CO)O)O)O)O)C5[C@@H]([C@H]([C@@H](O5)CO)O)O)O)O	8.2e-05	3	137832344	1	-2.309	Flavonoids
Euphornin A	GAQMOGICQDOKHD-ISSFDRLWNA-N	101831568	C[C@H]1C[C@]2([C@H]([C@H]1OC(=O)C3=CC=CC=C3)/C=C(\[C@@H](C[C@H](C(/C=C\[C@@H]([C@@H]2OC(=O)C)C)(C)C)OC(=O)C)O)/C)O	0.03	1.1	101831568	26	3.325	Diterpenes
Pachyclavulide I	BPTNOPJYGTTXJM-RWPSLRGDNA-N	101446679	C[C@H]1C(=O)O[C@@H]\2[C@@]1([C@H]([C@H]3C(=C[C@H]([C@@H]([C@@]3([C@H](/C=C\C(=C2)\COC)OC(=O)C)C)OC(=O)C)O)C)OC(=O)C)O	6.9e-05	3.6	101446679	55	0.675	Diterpenes
Ovalitenin A	KEJNXXMRDHDOCO-VQHVLOKHSA-N	10923878	COC1=C(C=CC2=C1C=CO2)C(=O)/C=C/C3=CC=CC=C3	3.1e-07	1.7	10923878	53	3.064	Isoflavones
(-)-Matairesinol	MATGKVZWFZHCLI-PVRQQBJHNA-N	119205	COC1=C(C=CC(=C1)C[C@H]2COC(=O)[C@@H]2CC3=CC(=C(C=C3)O)OC)O	5e-05	1.7	119205	92	1.515	Lignans
Mahanimbinine	ZMSFODUWJLWJOE-UHFFFAOYNA-N	131750980	CC1=CC2=C(C3=C1OC(C=C3)(C)CCCC(C)(C)O)NC4=CC=CC=C42	0.00012	2	131750980	35	3.9	Carbazoles
Ascorbyl stearate	LITUBCVUXPBCGA-UHFFFAOYNA-N	54725318	CCCCCCCCCCCCCCCCCC(=O)OC[C@@H]([C@@H]1C(=C(C(=O)O1)O)O)O	3.9e-05	1.5	54725318	109	9.35	Epoxy FA_24
Lucidenic acid A	INIPQDKLXQHEAJ-UHFFFAOYNA-N	14109375	C[C@H](CCC(=O)O)[C@H]1CC(=O)[C@@]2([C@@]1(CC(=O)C3=C2[C@H](C[C@@H]4[C@@]3(CCC(=O)C4(C)C)C)O)C)C	2.1e-05	1.6	14109375	64	1.906	Cholic Acids	B
(E)-1-Cinnamoylpyrrolidine	JSIGICUAXLIURX-HJWRWDBZSA-N	2056198	C1CCN(C1)C(=O)/C=C\C2=CC=CC=C2	8.9e-07	1.5	2056198	44	2.325
Deoxyvalidamine	FFRMLFVGYPMNPT-VTPUDEAPNA-N	127490	C1[C@@H]([C@H](C[C@H]([C@H]1N)O)O)CO	1.3e-05	1.3	127490	117	-0.986
Taxuyunnanine P	LYABGXKDPSCBMO-UEEJEOLKNA-N	12050611	CC1=C2[C@H]([C@@H]([C@@]3([C@H](C[C@@H]([C@H]([C@H]3[C@@H]([C@@]2(C[C@@H]1O)C(C)(C)O)O)CO)O)OC(=O)C)C)OC(=O)C)O	5.7e-05	1.2	12050611	49	-0.936	Taxoids
Passiguatemalin	GVFAYMLCFVOLFT-FICORQPONA-N	22297232	C1CC(C(C1O)O)(C#N)O[C@H]2[C@@H]([C@H]([C@@H]([C@H](O2)CO)O)O)O	0.017	0.95	22297232	20	-2.733		f
Presqualene diphosphate	ATZKAUGGNMSCCY-VYCBRMPGSA-N	5280592	CC(=CCC/C(=C/CC/C(=C/[C@H]1[C@@H]([C@@]1(C)CC/C=C(\C)/CCC=C(C)C)COP(=O)(O)OP(=O)(O)O)/C)/C)C	0.00056	1.1	5280592	111	7.581	Epoxy FA_30	C
Corticatic acid A	ACNZSZPAYNDIRJ-SWFYLXDKNA-N	6478038	C#C[C@@H](/C=C/CCCCCC#CC/C=C\CCCCCCCCCCC/C=C\C#CC(=O)O)O	9.4e-05	1.2	6478038	63	11.315	Saturated FA	D
Hydrangenoside E	SYCAAOWPYJBQKF-UHFFFAOYNA-N	21589718	COC(=O)C1=CO[C@H]([C@@H]([C@@H]1C[C@@H]2C[C@H](C[C@@H](O2)CCC3=CC=C(C=C3)O)O)C=C)O[C@H]4[C@@H]([C@H]([C@@H]([C@H](O4)CO)O)O)O	8.6e-05	3.9	21589718	37	0.58	Iridoids
Rostratamine	GQDQWQRPCUUAFD-ORIVAHKZNA-N	44575623	CC(=O)[C@@]1(CC[C@]2([C@@]1([C@@H](C[C@H]3[C@]2(CC=C4[C@@]3(CC[C@@H](C4)O)C)O)OC(=O)C5=CN=CC=C5)C)O)O	0.0015	1.2	44575623	30	-0.333	Sesquiterpenes
Trimethoprim	RIOXQFHNBCKOKP-UHFFFAOYSA-N	5578	COC1=CC(=CC(=C1OC)OC)CC2=CN=C(N=C2N)N	1.7e-06	1.3	5578	21	-0.545	Pyrimidines
Gibberellin A37 glucosyl ester	BQKJRWQLMRWZET-UHFFFAOYNA-N	131752406	CC12C(CCC3(C1C(C45C3CCC(C4)C(=C)C5)C(=O)OC6C(C(C(C(O6)CO)O)O)O)COC2=O)O	4e-05	1.4	131752406	56	0.987	Triterpenes
Tetrahydrofolyl-[Glu](n)	RXWVHRYZTWZATH-UHFFFAOYNA-N	135398572	C1[C@@H](NC2=C(N1)N=C(NC2=O)N)CNC3=CC=C(C=C3)C(=O)N[C@@H](CCC(=O)N[C@@H](CCC(=O)N[C@@H](CCC(=O)O)C(=O)O)C(=O)O)C(=O)O	0.00035	1.2	135398572	81	-5.476	Formyltetrahydrofolates
Dysoxylin C	LGJGIWPBFNKQNM-YWZVHLDRNA-N	16109861	CCC(C)C(=O)O[C@@H]1[C@H]2[C@H]3[C@](CO2)([C@@H](C[C@@H]([C@@]3([C@@H]4[C@@]1(C5=CC[C@H]([C@@]5([C@H](C4)OC(=O)C)C)C6CC(=O)OC6)C)C)OC(=O)C)O)C	0.037	1.1	16109861	103	3.364	Gibberellins	E
5,7-Dihydroxy-8-3',4',5'-tetramethoxyflavone 5-O-rhamnoside-6-C-glucoside	UQHLTUQPRGENNU-MUMCTMMINA-N	44258619	C[C@H]1[C@@H](C(C([C@@H](O1)OC2=C(C(=C(C3=C2C(=O)C=C(O3)C4=CC(=C(C(=C4)OC)OC)OC)OC)O)[C@H]5C([C@H]([C@@H](C(O5)CO)O)O)O)O)O)O	2.5e-07	1.5	44258619	1	-0.269	Flavonols
10-Hydroxy-2,8-decadiene-4,6-diynoic acid	AJSNUBLNFVLJEB-CGXWXWIYSA-N	131751124	C(/C=C\C#CC#C/C=C/C(=O)O)O	0.00011	1.3	131751124	63	1.08	Crotonates	D
Citrusin B	XMGKCJUCYBLMBY-PLNGDYQANA-N	11972318	COC1=CC(=CC(=C1OC(CO)C(C2=CC(=C(C=C2)O[C@H]3[C@@H]([C@H]([C@@H]([C@H](O3)CO)O)O)O)OC)O)OC)/C=C/CO	1.2e-05	1.1	11972318	59	-0.721	Lignans
Kaempferol	IYRMWMYZSQPJKC-UHFFFAOYSA-N	5280863	C1=CC(=CC=C1C2=C(C(=O)C3=C(C=C(C=C3O2)O)O)O)O	0.00019	3.2	5280863	7	1.486	Flavonols
Cyanidine-3-O-sambubioside	ZPPQIOUITZSYAO-UHFFFAOYNA-O	74976920	C1C(C(C(C(O1)OC2C(C(C(OC2OC3=CC4=C(C=C(C=C4[O+]=C3C5=CC(=C(C=C5)O)O)O)O)CO)O)O)O)O)O	0.0002	3	74976920	1	-0.633	Anthocyanins
Luteolin-4'-O-glucoside	PEFNSGRTCBGNAN-QNDFHXLGSA-N	12304738	C1=CC(=C(C=C1C2=CC(=O)C3=C(C=C(C=C3O2)O)O)O)OC4[C@@H]([C@H]([C@@H]([C@H](O4)CO)O)O)O	1.4e-07	1.3	12304738	1	-0.249	Glucosides
Dantaxusin C	MOYWWZOOLCCTFX-XRYBAJIBNA-N	10985288	CC(=O)O[C@H]1C[C@@H](C(=C)[C@@H]2[C@@]1([C@H]([C@@H]([C@]34[C@](O3)(C(=O)C[C@@H]([C@H]2OC(=O)C)C4(C)C)C)OC(=O)C)OC(=O)C)C)OC(=O)/C=C/C5=CC=CC=C5	8.4e-09	0.39	10985288	86	3.707	Taxoids
11beta-Acetoxydihydrocedrelone	PIWQSPSJNTWMFV-QFASWNBENA-N	21606574	CC(=O)O[C@H]1C[C@]2([C@@H](C[C@@H]3[C@]2(O3)[C@]4([C@H]1[C@]5(CCC(=O)C(C5=C(C4=O)O)(C)C)C)C)C6=COC=C6)C	5.3e-07	0.46	21606574	88	2.428	Limonins
Serratine	SWDKDXWGADMDSP-HWSQZMMLNA-N	442500	C[C@@]1(C[C@H]2CC(=O)[C@@]34[C@@]2(CCCN3CCC4)[C@H](C1)O)O	0.0026	1.1	442500	80	0.147		F
Cimilactone A	RKTWPXXLEHCPIO-YEBZOTOENA-N	10908062	C[C@@H]1CC(=O)O[C@@H]2[C@H]1[C@]3([C@@H](C[C@@]45C[C@@]46CC[C@@H](C([C@@H]6CC[C@H]5[C@@]3(C2)C)(C)C)O[C@H]7[C@@H]([C@H]([C@@H](CO7)O)O)O)OC(=O)C)C	7.7e-05	3.8	10908062	83	5.425	Glycosides
Diosphenol	QSIMLPCPCXVYDD-UHFFFAOYNA-N	79023	CC1=C(C(=O)C(CC1)C(C)C)O	0.00024	1.1	79023	43	2.164
2,4,5,7alpha-Tetrahydro-1,4,4,7a-tetramethyl-1H-inden-2-ol	MHUYBIUXLMLCJM-UHFFFAOYNA-N	66963592	CC1C(C=C2C1(C=CCC2(C)C)C)O	0.00061	1.1	66963592	107	3.497		G
Leopersin N	CHGSKJMRTUWQRQ-HQVUBUCUNA-N	15834303	CC(=O)O[C@]1(C(=O)[C@@H]2[C@H]3[C@](CCC[C@@]3([C@@]14CC[C@@]5(O4)C[C@@H](OC5)OC)C)(C(=O)O2)C)C	7.4e-06	1.2	15834303	112	1.642		r
Taxagifine	FQCUWQFKTUBVLA-YIVAOXQANA-N	44316472	CC(=O)O[C@H]1C[C@@H](C(=C)[C@@H]2[C@@]1([C@H]([C@@H]([C@@]3([C@]4(CO[C@@]3(C(=O)C[C@H]4[C@H]2OC(=O)C)C)C)O)OC(=O)C)OC(=O)C)C)OC(=O)/C=C/C5=CC=CC=C5	0.00061	1.1	44316472	86	2.575	Taxoids
Solacauline	WNUZFFNCQHQMDD-UHFFFAOYNA-N	131750862	CC1CCC2C(C3C(N2C1)CC4C3(CCC5C4CC=C6C5(CCC(C6)OC7C(C(C(CO7)OC8C(C(C(CO8)OC9C(C(C(C(O9)CO)O)O)O)O)O)O)O)C)C)C	1.6e-05	1.4	131750862	14	2.447	Solanine	H
Gagunin J	ACETYDTUPLBCGS-JMZNUKMQNA-N	25135700	CCCC(=O)O[C@H]1C[C@@]2([C@H](C=C([C@@H]([C@@H]([C@H]2OC(=O)CCC)OC(=O)C)O)C)[C@@H]3[C@]1([C@H]([C@@H]([C@@H]3C(C)C)OC(=O)CCC)OC(=O)CC)C)C	7.8e-06	1.4	25135700	49	6.088	Taxoids
Leucascandrolide A	DJSCTOCFSZYDND-FKNNPDMINA-N	10818492	C[C@H]1CC[C@H]2C[C@@H](OC(=O)C[C@H]3C[C@@H](C[C@H](O3)C[C@H](C[C@H]1O2)OC)OC(=O)/C=C\CCC4=COC(=N4)/C=C\CNC(=O)OC)/C=C/CC(C)C	0.00011	4.6	10818492	78	5.709	Sesquiterpenes	I
Soyasaponin I methyl ester	ZEIAROWTCSYWFT-UIADHOMFNA-N	21629875	C[C@H]1[C@@H]([C@H]([C@H]([C@@H](O1)O[C@@H]2[C@H]([C@H]([C@H](O[C@H]2O[C@@H]3[C@H]([C@@H]([C@H](O[C@H]3O[C@H]4CC[C@]5([C@H]([C@@]4(C)CO)CC[C@@]6([C@@H]5CC=C7[C@]6(CC[C@@]8([C@H]7CC(C[C@H]8O)(C)C)C)C)C)C)C(=O)OC)O)O)CO)O)O)O)O)O	4e-06	1.5	21629875	4	4.906	Saponins	J
Siderochelin C	PUARYECATSVDEK-WYVADAIZNA-N	146793	CC[C@]1(C[C@H](N=C1C2=C(C=CC=N2)O)C(=O)N)O	0.00014	3.2	146793	19	-1.512	Pyridines
Pelargonidin-3-O-glucoside	ABVCUBUIXWJYSE-UHFFFAOYNA-O	12302249	C1=CC(=CC=C1C2=[O+]C3=CC(=CC(=C3C=C2OC4C(C(C(C(O4)CO)O)O)O)O)O)O	0.00025	2.9	12302249	1	0.313	Flavonols
Genistein	OBWHQJYOOCRPST-UHFFFAOYSA-N	5280961	C1=CC(=CC=C1C2=COC3=CC(=CC(=C3C2=O)O)O)O	0.00024	2.9	5280961	7	1.043	Isoflavones
Apiin	OMWBSQBBFSNJKL-SFGIUNDLNA-N	5280746	C1[C@@]([C@H]([C@@H](O1)O[C@@H]2[C@H]([C@@H]([C@H](O[C@H]2OC3=CC(=C4C(=C3)OC(=CC4=O)C5=CC=C(C=C5)O)O)CO)O)O)O)(CO)O	0.00014	2.7	5280746	1	-1.505	Flavonoids
PA(15:0/22:6(4Z,7Z,10Z,13Z,16Z,19Z))	AUQJMTAYSKRMCC-FRGLPGJGSA-N	52928751	CCCCCCCCCCCCCCC(=O)OC[C@H](COP(=O)(O)O)OC(=O)CC/C=C\C/C=C\C/C=C\C/C=C\C/C=C\C/C=C\CC	9.8e-05	5.1	52928751	3	14.365	Phosphatidic Acids	K
Isothalirine	QAQKPFYSONCQAR-UHFFFAOYNA-N	15907630	CN1CCC2=CC(=C(C=C2C1CC3=CC(=C(C=C3OC4=C(C(=C5CCN(C(C5=C4)CC6=CC(=C(C=C6)OC)OC)C)OC)OC)OC)OC)OC)OC	8.2e-05	4.4	15907630	27	4.115	Benzylisoquinolines
Tinosineside A	GADVYUZLGRAFKB-FCQHHSGBNA-N	101918066	CC(=O)O[C@H]1[C@H](C[C@H]([C@@H]2[C@@H]1[C@@]3(C[C@H](OC(=O)[C@@]3(CC2)O)C4=COC=C4)C)O[C@H]5[C@@H]([C@H]([C@@H]([C@H](O5)CO)O)O)O)O	0.0088	0.94	101918066	58	-0.613	Limonins	w
Tectorigenin	MBNGWHIJMBWFHU-UHFFFAOYSA-N	5281811	COC1=C(C2=C(C=C1O)OC=C(C2=O)C3=CC=C(C=C3)O)O	0.00061	4.2	5281811	53	1.283	Isoflavones
5-[6-[[3,4-dihydroxy-4-(hydroxymethyl)oxolan-2-yl]oxymethyl]-3,4,5-trihydroxyoxan-2-yl]oxy-4-(3,4-dihydroxyphenyl)-7-methoxychromen-2-one	YONLJLRPNAUKHY-UHFFFAOYNA-N	23983728	COC1=CC2=C(C(=CC(=O)O2)C3=CC(=C(C=C3)O)O)C(=C1)OC4C(C(C(C(O4)COC5C(C(CO5)(CO)O)O)O)O)O	0.00068	4.3	23983728	1	-0.836	Flavonoids
Gibberellin A20	OXFPYCSNYOFUCH-NYJSUMFWNA-N	5280481	C[C@@]12CCC[C@@]3([C@@H]1[C@@H]([C@]45[C@H]3CC[C@](C4)(C(=C)C5)O)C(=O)O)OC2=O	3.3e-07	1.6	5280481	46	0.726	Saturated_Fatty Acids	L
Viridominic acid A	RYSOWAXDKQQGFZ-PQFKBGJRNA-N	137331934	C[C@@H]1[C@@H](CC[C@]2([C@H]1[C@H]([C@@H]([C@]3([C@H]2C(=O)C[C@@H]\4[C@@]3(C[C@@H](/C4=C(/CCC=C(C)C)\C(=O)O)OC(=O)C)C)C)O)OC(=O)C)C)O	0.0025	0.93	137331934	93	3.538	Saponins	M
Aspergillimide	RTNMRJRMTGSUAE-MFYQJFMMNA-N	70698047	C[C@@H]1CCN2[C@@]13C[C@H]4[C@@](C2)(C[C@]5(C4(C)C)CC(=O)N(C5=O)C)N(C3=O)C	0.00011	2.3	70698047	80	0.401	Hydrocarbons, Cyclic	F
D-rhodosamine	WMUYJHSRMOORHK-PRJMDXOYSA-N	5460917	C[C@H]([C@@H]([C@@H](CC=O)N(C)C)O)O	0.018	1.1	5460917	18	-0.867	Hexosamines	b
3-Methoxyfaurithaline	OHRAOGOGUKPFCC-OBXPXUJENA-N	21581050	CN1CCC2=C3[C@@H]1CC4=C(C3=C(C(=C2OC)OC)OC)C(=C(C=C4OC5=C(C=CC(=C5)C[C@H]6C7=CC(=C(C=C7CCN6C)OC)O)OC)OC)O	8.9e-07	1.4	21581050	27	3.227	Benzylisoquinolines
PIM2(17:0/18:0)	OAPLXIVHZHONPH-LOSQAETFNA-N	126457428	CCCCCCCCCCCCCCCCCC(=O)O[C@H](COC(=O)CCCCCCCCCCCCCCCC)COP(=O)(O)OC1[C@@H](C(C(C(C1O[C@H]2[C@H](C([C@H](C(O2)CO)O)O)O)O)O)O)O[C@@H]3[C@@H](C([C@@H](C(O3)CO)O)O)O	2.1e-05	1.8	126457428	51	11.006
PGP(18:0/18:2(9Z,12Z))	BEGQHSCGKQAIAS-KKUBIFFLSA-N	53481825	CCCCCCCCCCCCCCCCCC(=O)OC[C@H](COP(=O)(O)OC[C@H](COP(=O)(O)O)O)OC(=O)CCCCCCC/C=C\C/C=C\CCCCC	8.1e-05	5.2	53481825	12	13.013	Phosphatidylethanolamines	N
Blumenol C glucoside	NYLNHNDMNOPWAZ-UHFFFAOYNA-N	14135395	CC1=CC(=O)CC([C@H]1CC[C@@H](C)O[C@H]2[C@@H]([C@H]([C@@H]([C@H](O2)CO)O)O)O)(C)C	0.0054	1.1	14135395	31	1.211	Norisoprenoids
p-Cymene	HFPZCAJZSCWRBC-UHFFFAOYSA-N	7463	CC1=CC=C(C=C1)C(C)C	0.001	1.1	7463	28	3.834	Monoterpenes	t
argeloside C	SBYKFQMNFNKJPZ-CXTLOLCSSA-N	101746052	C[C@@H]1[C@H]([C@@H]([C@H]([C@@H](O1)O[C@@H]2[C@H](O[C@H](C[C@H]2OC)O[C@@H]3[C@H](O[C@H](C[C@@H]3OC)O[C@@H]4[C@H](O[C@H](C[C@H]4OC)O[C@H]5CC[C@@]6([C@H]7CC[C@@]8([C@@H]9[C@H]1CO[C@@]9(O[C@]8([C@@H]7CC=C6C5)O1)C)C)C)C)C)C)O)OC)O	0.0001	5.3	101746052	14	2.885	Saponins	H
(1S,2R,4R,8S)-p-Menthane-2,8,9-triol 9-glucoside	KRTKKVIKRTZKGY-UHFFFAOYNA-N	73809749	CC1CCC(CC1O)C(C)(COC2C(C(C(C(O2)CO)O)O)O)O	0.00045	1.2	73809749	104	-0.783	Triterpenes	p
Calamendiol	AHNGXHRYFGQWSL-UHFFFAOYNA-N	181982	CC(C)[C@@H]1CC[C@]([C@H]2[C@]1(CC(=C)CC2)O)(C)O	0.022	1.4	181982	97	2.771	Diterpenes
Cuniloside	JOLLIDAUJSAZHE-XFJFLBFJNA-N	51136390	CC(C)(C1CCC(=CC1)C(=O)OC[C@@H]2[C@H]([C@@H]([C@H]([C@@H](O2)OC(=O)C3=CCC(CC3)C(C)(C)O)O)O)O)O	0.018	1.5	51136390	39	0.913	Monoterpenes
Cherinonaine	GGWMKGFGKXXORT-HONZKESMNA-N	101932855	COC1=C(C=CC(=C1)CC(NC(=O)/C=C/C2=CC(=C(C=C2)O)OC)COCC(NC(=O)/C=C/C3=CC(=C(C=C3)O)OC)CC4=CC(=C(C=C4)O)OC)O	0.00023	2.2	101932855	71	2.366	Phenols
Catheduline E2	JNJVNIAUYUVQJX-QJISGKSZNA-N	442517	C[C@@H]1C[C@@H]([C@@H]([C@@]2([C@]13C[C@@H]([C@H]([C@@H]2OC(=O)C4=CC=CC=C4)OC(=O)C5=CN=CC=C5)C(O3)(C)C)COC(=O)C6=CN=CC=C6)OC(=O)C)OC(=O)C	0.015	1.6	442517	30	2.614	Sesquiterpenes
Spirotryprostatin C	YPSDDVCGIHETLQ-WQTWIUDHNA-N	25034616	CC(=CCN1C2=C(C=CC(=C2)OC)[C@]3(C1=O)[C@@H](N4C(=O)[C@@H]5CCCN5C(=O)[C@@]4([C@H]3O)O)C=C(C)C)C	2.4e-05	1.3	25034616	77	1.043
Fucalpha1-2Galalpha1-3Galbeta1-4Glcbeta-Cer(d18:1/16:0)	VGTSDXWPYPPYSM-YVEJXIANNA-N	44261852	CCCCCCCCCCCCCCCC(=O)N[C@@H](CO[C@H]1C([C@H]([C@@H](C(O1)CO)O[C@H]2C([C@H]([C@H](C(O2)CO)O)O[C@@H]3C([C@H]([C@H](C(O3)CO)O)O)O[C@H]4[C@H](C(CC(O4)C)O)O)O)O)O)[C@@H](/C=C/CCCCCCCCCCCCC)O	0.0083	1.1	44261852	76	8.671	Trihexosylceramides	O
Kansuinin H	JUCOOGZXMGBGJB-TVLXFDHANA-N	101353185	C[C@H]1[C@@H]2[C@]3(C[C@@]([C@@H]([C@@H]3[C@H](C(=C)[C@@H]([C@H]([C@H](C([C@H](C1=O)O2)(C)C)OC(=O)C)OC(=O)C4=CC=CC=C4)OC(=O)C)OC(=O)C)OC(=O)C)(C)O)OC(=O)C	0.0001	1.1	101353185	26	2.419	Diterpenes
Piptocarphin A	BZQDHZDSIXPDSS-OKRQSNPDNA-N	101085410	CC(=C)C(=O)O[C@@H]1C[C@@]([C@]2(CC[C@](O2)(/C=C/3\C1=C(C(=O)O3)COC(=O)C)C)O)(C)O	5e-05	1.4	101085410	33	1.313	Macrolides
Cholesterol sulfate	BHYOQNUELFTYRT-ZMWIUTBPNA-N	65076	C[C@H](CCCC(C)C)[C@H]1CC[C@@H]2[C@@]1(CC[C@H]3[C@H]2CC=C4[C@@]3(CC[C@@H](C4)OS(=O)(=O)O)C)C	4.4e-05	1.3	65076	96	9.221	Cholesterol Esters
Fasciculol F	YKNPFZYHSXIFMX-UHFFFAOYNA-N	128270	C[C@@]12CC[C@@H]([C@]1([C@H](CC3=C2CCC4[C@@]3(C[C@H]([C@@H](C4(C)C)O)OC(=O)CC(C)(CC(=O)NCC(=O)OC)O)C)O)C)[C@@H](CC[C@H](C(C)(C)O)O)CO	7.5e-06	1.4	128270	80	1.907	Triterpenes	F
Traversianal	ZCTUNYRXJKLWPY-UHFFFAOYNA-N	6442110	C[C@@H]1CC(=O)[C@]/2([C@@H]1C[C@]3(CC[C@@H]([C@@H]3C/C=C2/C=O)C(=C)C)C)O	6.4e-05	1.2	6442110	43	4.876	Diterpenes
Capsianoside V	XQQKZIVFXGPJHN-KMRBWUSPNA-N	14610543	C/C(=C\CC/C(=C/CCC(C)(C=C)OC1C(C(C(C(O1)CO)O)O)O)/CO)/CC(/C=C(\C)/C(=O)O)O	9.8e-05	1.2	14610543	47	0.271	Macrolides
PS(15:1(9Z)/18:2(9Z,12Z))	AIWIBHBAGSYABQ-SZGFWDSJNA-N	52925284	CCCCC/C=C\CCCCCCCC(=O)OC[C@H](COP(=O)(O)OC[C@@H](C(=O)O)N)OC(=O)CCCCCCC/C=C\C/C=C\CCCCC	9.8e-07	1.5	52925284	2	9.943	Phosphatidylserines
1,2-Bis(1-ethoxyethoxy)propane	TZVJNJVDGXFMCF-UHFFFAOYNA-N	5362566	CCOC(C)OCC(C)OC(C)OCC	0.0021	1.1	5362566	20	1.95		f
3-Hydroxynonyl acetate	RTYFAKSWXDNPPU-UHFFFAOYNA-N	234237	CCCCCCC(CCOC(=O)C)O	8.2e-05	1.2	234237	16	2.984	O=FA_11_0	j
Matesaponin 2	ZGNBKNDOCCHRSM-UHFFFAOYNA-N	101920696	C[C@@H]1CC[C@@]2(CC[C@@]3(C(=CC[C@H]4[C@]3(CC[C@@H]5[C@@]4(CC[C@@H](C5(C)C)O[C@H]6[C@@H]([C@H]([C@H](CO6)O)O[C@H]7[C@@H]([C@H]([C@@H]([C@H](O7)CO)O)O)O)O[C@H]8[C@@H]([C@@H]([C@H]([C@@H](O8)C)O)O)O)C)C)[C@@H]2[C@H]1C)C)C(=O)O[C@H]9[C@@H]([C@H]([C@@H]([C@H](O9)CO)O)O)O	9.6e-06	1.4	101920696	4	4.412	Triterpenes	J
Scoparasin B	YXSYADYLBHSOLA-MWOLTELDNA-N	11642398	C[C@H]1C/C=C/[C@H]2[C@@H]([C@]([C@H]([C@@H]3[C@]2(C(=O)N[C@H]3CC4=CC=C(C=C4)OC)OC(=O)O/C=C/[C@@](C1=O)(C)O)C)(C)O)O	0.00015	2	11642398	42	1.331		g
PS(P-18:0/18:4(6Z,9Z,12Z,15Z))	OAXXFXVAVZAIRI-HKFLZXADNA-N	52926225	CCCCCCCCCCCCCCCC/C=C\OC[C@H](COP(=O)(O)OC[C@@H](C(=O)O)N)OC(=O)CCCC/C=C\C/C=C\C/C=C\C/C=C\CC	2.1e-05	1.4	52926225	2	12.05	Phosphatidylserines
Andrachcinidine	GFVMHSQLCIEXNG-PCRUOVEUNA-N	101056755	CCC[C@H](C[C@H]1CCC[C@H](N1)CC(=O)C)O	4.3e-05	1.3	101056755	18	2.461	Piperidines	b
Tricalysioside T	IKBFZZPRIOQBPZ-AOHHEPDGNA-N	24749675	C[C@]1(CCC[C@@]2([C@@H]1CC[C@]34[C@H]2CC[C@H](C3)[C@]([C@@H]4O)(CO)O)C)CO[C@H]5[C@@H]([C@H]([C@@H]([C@H](O5)CO)O)O)O	5.3e-05	1.2	24749675	25	2.636	Triterpenes
Dehydrofalcarinone	HLHBDMWPPKHNDQ-KHPPLWFESA-N	5281145	C=CCCCCC/C=C\CC#CC#CC(=O)C=C	1.8e-05	0.75	5281145	82	6.291
PS(20:4(5Z,8Z,11Z,14Z)/20:3(8Z,11Z,14Z))	IEHVRLNIHFLLMS-WUDDRQCASA-N	52925751	CCCCC/C=C\C/C=C\C/C=C\CCCCCCC(=O)O[C@H](COC(=O)CCC/C=C\C/C=C\C/C=C\C/C=C\CCCCC)COP(=O)(O)OC[C@@H](C(=O)O)N	7.4e-06	1.4	52925751	2	12.618	Phosphatidylserines
Dendronpholide L	LLASBBKHEICHEF-IAJBXFBYNA-N	102395383	CCOC(=O)C(=C)[C@@H]1CC[C@@]([C@H]2CC[C@@](O2)([C@H](CC[C@]([C@H](C1)O)(C)O)OC(=O)C)C)(C)O	5.6e-05	1.3	102395383	55	2.539	Hydrocarbons, Cyclic
Sucrose acetate isobutyrate	UVGUPMLLGBCFEJ-ROWWBAASNA-N	31339	CC(C)C(=O)OC[C@@H]1[C@H]([C@@H]([C@](O1)(COC(=O)C)O[C@@H]2[C@@H]([C@H]([C@@H]([C@H](O2)COC(=O)C)OC(=O)C(C)C)OC(=O)C(C)C)OC(=O)C(C)C)OC(=O)C(C)C)OC(=O)C(C)C	8.1e-07	1.7	31339	20	3.345		f
BU-4664L	SALVHVNECODMJP-GNUCVDFRSA-N	9868980	CC(=CCC/C(=C/CC/C(=C/CN1C2=C(C(=CC(=C2)O)O)NC3=C(C1=O)C=CC=C3O)/C)/C)C	7.9e-05	1.3	9868980	77	6.645	Dibenzazepines
Fomitopsin A	SBQVJLOKEGLUHV-TYRRJVDONA-N	101763180	C[C@H](CC(=O)C(=C)C(C)C(=O)O)[C@H]1CC[C@@]2([C@@]1([C@@H](CC3=C2CC[C@@H]4[C@@]3(CC[C@H](C4(C)C)OC(=O)CC(=O)O)C)O)C)C	0.0051	0.84	101763180	100	5.142	Triterpenes	P
Ganoderic acid AP2	QLPXRZYNNFETED-NBCZPYCZNA-N	101863398	C[C@H](CC/C=C(\C)/C(=O)O)[C@H]1C[C@@H]([C@@]2([C@@]1([C@@H](C(=O)C3=C2CC[C@@H]4[C@@]3(CC[C@@H](C4(C)C)O)C)OC(=O)C)C)C)OC(=O)C	8e-05	2.4	101863398	64	5.202	Saponins	B
Capsianoside III	AKJRMUURRHAKDT-DRPMNEMANA-N	14610548	C[C@H]1[C@@H]([C@H]([C@H]([C@@H](O1)OC[C@@H]2[C@H]([C@@H]([C@H]([C@@H](O2)O[C@@H]3[C@H]([C@@H]([C@H](O[C@H]3OC/C(=C\CC/C(=C/CC/C(=C/CC[C@@](C)(C=C)O[C@H]4[C@@H]([C@H]([C@@H]([C@H](O4)CO)O)O)O[C@H]5[C@@H]([C@H]([C@@H]([C@H](O5)CO)O)O)O)/C)/C)/C)CO)O)O)O)O)O)O)O)O	0.00012	1.2	14610548	22	-1.893	Glycolipids
NCGC00385079-01_C19H34O7_4-(4-Hydroxy-2,6,6-trimethyl-1-cyclohexen-1-yl)-2-butanyl beta-D-glucopyranoside	UJRMJTIXXKZFGB-UHFFFAOYNA-N	51136504	CC1=C(C(CC(C1)O)(C)C)CCC(C)O[C@H]2[C@@H]([C@H]([C@@H]([C@H](O2)CO)O)O)O	2.6e-05	1.3	51136504	67	0.473	Diterpenes
NCGC00385284-01_C32H54O13_(2E)-5-{(1R,4aS,5S,6R,8aS)-5-[(beta-D-Glucopyranosyloxy)methyl]-6-hydroxy-5,8a-dimethyl-2-methylenedecahydro-1-naphthalenyl}-3-methyl-2-penten-1-yl beta-D-glucopyranoside	QIOMMMCQFIBVKA-MHWRWJLKNA-N	13855771	C/C(=C\CO[C@H]1[C@@H]([C@H]([C@@H]([C@H](O1)CO)O)O)O)/CC[C@@H]2C(=C)CC[C@H]3[C@]2(CC[C@H]([C@]3(C)CO[C@H]4[C@@H]([C@H]([C@@H]([C@H](O4)CO)O)O)O)O)C	1.6e-06	1.3	13855771	15	1.445	Diterpenes	u
Vitamin A	FPIPGXGPPPQFEQ-OVSJKPMPSA-N	445354	CC1=C(C(CCC1)(C)C)/C=C/C(=C/C=C/C(=C/CO)/C)/C	1.8e-05	1.3	445354	98	6.158	Carotenoids
Darutoside	QWWPCQGHWWNGET-UHFFFAOYNA-N	44715524	C[C@@]1(CC[C@@H]2C(=C1)CC[C@H]3[C@]2(CC[C@H](C3(C)C)O[C@H]4[C@@H]([C@H]([C@@H]([C@H](O4)CO)O)O)O)C)[C@H](CO)O	5.4e-05	1.3	44715524	15	2.133	Diterpenes	u
Retinoic acid	QPRQNCDEPWLQRO-SJAWMATLNA-N	444795	CC1=C(C(CCC1)(C)C)/C=C/C(=C/C=C/C(=C/C(=O)O)/C)/C	2.1e-05	1.3	444795	98	6.254	Vitamin A
Capsianoside I	ISQUNAAALVXWGI-DFTZOVBQNA-N	14610541	C/C(=C\CCC(C)(C=C)OC1C(C(C(C(O1)CO)O)O)OC2C(C(C(C(O2)CO)O)O)O)/CC/C=C(\C)/CC(/C=C(\C)/C(=O)O)O	0.044	1.1	14610541	47	0.615	Macrolides
Lagerstroemine	RYMSMTOEKVDTDB-UHFFFAOYNA-N	78385190	COC1=C(C2=C(C=C1)C3CC(CC4N3CCCC4)OC(=O)CCC5=CC2=C(C=C5)O)OC	8e-05	3.7	78385190	34	2.911	Quinolizidines
Spiroidesin	XFLVJFHNXBWJDL-NCRUWMDKNA-N	637849	CCCCCC(=O)N[C@H](CCC1=CC=C(C=C1)O)C(=O)N[C@@H](CCC2=CC=C(C=C2)O)C(=O)N[C@H](CC3=CC=CC=C3)C(=O)O	3.6e-06	0.74	637849	9	3.587	Lipopeptides
Indole-3-acetyl-L-isoleucine	WPTUQMUCTTVOFW-BONVTDFDSA-M	644226	CC[C@H](C)[C@@H](C(=O)O)NC(=O)CC1=CNC2=CC=CC=C21	5.7e-05	1.3	644226	52	1.727	Oligopeptides
alpha-Irone	JZQOJFLIJNRDHK-CMDGGOBGNA-N	5371002	CC1CC=C(C(C1(C)C)/C=C/C(=O)C)C	0.00012	1.2	5371002	32	4.611	Norisoprenoids
6,10,14-Trimethyl-2-methylenepentadecanal	PTFJEDBJXCZCDO-UHFFFAOYNA-N	23286475	CC(C)CCCC(C)CCCC(C)CCCC(=C)C=O	0.00013	1.2	23286475	32	8.721
Manassantin A	ZGXXNVOBEIRACL-LJLMIKCGNA-N	15605952	C[C@@H]1[C@H]([C@H](O[C@@H]1C2=CC(=C(C=C2)O[C@H](C)[C@@H](C3=CC(=C(C=C3)OC)OC)O)OC)C4=CC(=C(C=C4)O[C@H](C)[C@@H](C5=CC(=C(C=C5)OC)OC)O)OC)C	8.7e-11	0.41	15605952	59	4.79	Lignans
3-O-acetylecdysone 2-phosphate	MYOZIWALDKJCBG-KXCOSXAXSA-N	23657836	C[C@@H]([C@H]1CC[C@@]2([C@@]1(CC[C@H]3C2=CC(=O)[C@H]4[C@@]3(C[C@@H]([C@@H](C4)OC(=O)C)OP(=O)(O)O)C)C)O)[C@@H](CCC(C)(C)O)O	2e-06	0.69	23657836	93	1.041	Saponins	M
Pentandroside C	IOPZVHATZOARDL-FBUFDRGANA-N	101361933	C[C@@H](CC[C@@H]([C@@H](C)[C@H]1[C@H](C[C@@H]2[C@@]1(C[C@H]([C@H]3[C@H]2CCC4=CC(=O)CC[C@]34C)O)C)O[C@H]5[C@@H]([C@H]([C@@H](CO5)O)O[C@H]6[C@@H]([C@H]([C@@H]([C@H](O6)CO)O)O)O)O)O)CO	4e-05	3.1	101361933	31	-0.34	Glucosides
Capsianoside II	NFBYZSYLZUMCFV-CVVMOWQVNA-N	21672514	C[C@H]1[C@@H]([C@H]([C@H]([C@@H](O1)OC[C@@H]2[C@H]([C@@H]([C@H]([C@@H](O2)O[C@@H]3[C@H]([C@@H](O[C@H]([C@@H]3O)OC/C(=C\CC/C(=C/CC/C(=C/CC[C@@](C)(C=C)O[C@H]4[C@@H]([C@H]([C@@H]([C@H](O4)CO)O)O)O[C@H]5[C@@H]([C@H]([C@@H]([C@H](O5)CO)O)O)O)/C)/C)/C)C)O)O)O)O)O)O)O	0.0068	1.1	21672514	22	-1.619	Glycolipids
(+)-vulgraon B	XHHIKHVPBSQUIJ-VKJZCYHPSA-N	71728348	CC1=CC(=C)C2[C@H]3C1[C@@]2(CCCC3(C)C)C	0.00017	1.2	71728348	40	6.586	Sesquiterpenes	A
Xenortide A	UAFFXYUNGBKFSK-VVWGFWRPNA-N	24900168	CC(C)C[C@@H](C(=O)N(C)[C@@H](CC1=CC=CC=C1)C(=O)NCCC2=CC=CC=C2)NC	0.00012	3.5	24900168	36	3.718	Dipeptides	q
(2b,3b)-Dihydroxy-30-nor-12,20(29)-oleanadiene-28-glucopyranosyloxy-23-oic acid 3-glucuronide	UDJQXYVUQBGNDM-UHFFFAOYNA-N	76401286	CC12CCC3C(C1CC=C4C2(CCC5(C4CC(=C)CC5)C(=O)OC6C(C(C(C(O6)CO)O)O)O)C)(CC(C(C3(C)C(=O)O)OC7C(C(C(C(O7)C(=O)O)O)O)O)O)C	0.00029	0.87	76401286	4	2.592	Saponins	J
Isothalicrine	IJVBJQZGTABEMP-RFTMCNCJNA-N	15907629	CN1CCC2=CC(=C(C=C2[C@@H]1CC3=CC(=C(C=C3)OC)O)OC4=C(C(=C(C(=C4)C[C@H]5C6=CC(=C(C(=C6CCN5C)OC)OC)OC)OC)OC)OC)OC	8.7e-07	0.66	15907629	27	4.034	Benzylisoquinolines
Quivisianthone	ZNCUKAYDXAEZCT-MUMFWNDXNA-N	101338376	C/C=C(/C)\C(=O)O[C@@H]1[C@@H]([C@@H]2[C@@]([C@@H]3[C@@]1(C4=CC(=O)[C@H]([C@@]4(CC3)C)C5=COC=C5)C)([C@H](CC(=O)OC2(C)C)OC(=O)C)C)O	6.9e-05	2.7	101338376	58	3.201	Limonins	w
Ganoderic acid Mk	BCZACVDBVIYNMZ-VXLYETTFNA-N	13916707	CC(C1CC(C2(C1(CC=C3C2=CCC4C3(CCC(C4(C)C)OC(=O)C)C)C)C)O)C(C/C=C(\C)/C(=O)O)OC(=O)C	6.8e-05	3.1	13916707	64	6.07	Saponins	B
Avicennamine	HWNLAGBDXKGMAH-KNIGOARZNA-N	11799812	C[C@]1(C[C@@H]([C@@H]2[C@H]1[C@H](C2(C)C)C3=C(C=CC(=C3)CCN(C)C)OC)C4=C(C=CC(=C4)CCN(C)C)OC)O	8.7e-07	1.4	11799812	34	3.222
12,14-Dihydroxyphytol	JMZZBVNSDNHLIV-ZFERPUGGNA-N	101938879	C[C@H](CCC[C@H](C)C(CC(C(C)C)O)O)CCC/C(=C/CO)/C	0.00019	1.3	101938879	68	4.99	OH-FA_20_0_1	z
1,3-Dimethyluracil	JSDBKAHWADVXFU-UHFFFAOYSA-N	70122	CN1C=CC(=O)N(C1=O)C	0.0019	0.89	70122	38	-0.591		h
Lyngbyapeptin B	FSPMQCXNAYXLFE-XMHNBKRENA-N	11146976	C[C@@H](C1=NC=CS1)NC(=O)[C@H](CC2=CC=C(C=C2)OC)N(C)C(=O)[C@H](C(C)C)N(C)C(=O)[C@H](CC3=CC=C(C=C3)OC)N(C)C(=O)/C=C(\C)/OC	0.00019	1.2	11146976	21	1.706	Lyngbya Toxins
Euphornin	BRVXVMOWTHQKHC-LVYIKVSWNA-N	6440619	C[C@H]1C[C@]2([C@H]([C@H]1OC(=O)C3=CC=CC=C3)/C=C(\[C@@H](C[C@H](C(/C=C\[C@@H]([C@@H]2OC(=O)C)C)(C)C)OC(=O)C)OC(=O)C)/C)O	6.1e-05	3.5	6440619	26	4.065	Diterpenes
Sclareol	XVULBTBTFGYVRC-UHFFFAOYNA-N	163263	C[C@]12CCCC([C@@H]1CC[C@@]([C@@H]2CC[C@](C)(C=C)O)(C)O)(C)C	0.00012	1.3	163263	97	5.989	Diterpenes
Cytochalasin Ppho	AVASIWUXPVFFGK-WISUYLHINA-N	13892289	C[C@H]1C/C=C/[C@H]2[C@@H]([C@@]([C@H]([C@@H]3[C@@]2([C@@H](/C=C/[C@](C1)(C)O)OC(=O)C)C(=O)N[C@H]3CC4=CC=CC=C4)C)(C)O)O	1.6e-06	1.4	13892289	42	3.326		g
(+)-Norushinsunine N-oxide	PQQSHMZUVWGXSV-UHFFFAOYNA-N	13891870	C[N+]1(CCC2=CC3=C(C4=C2C1C(C5=CC=CC=C54)O)OCO3)[O-]	9.3e-05	2.9	13891870	34	0.392	Alkaloids
Broussonetine S	RLBPSCXQOMYGEN-SXZAJXFZNA-N	10832551	C(CCCC[C@H]([C@@H]1[C@H]([C@@H]([C@H](N1)CO)O)O)O)CCC[C@@H](CCCO)O	9.8e-07	0.71	10832551	72	2.151	Pyrrolidines	Q
Bacopaside III	JZAZJIXVJNAOQD-XQCKADIZNA-N	15922618	CC(=C[C@@H]1CO[C@]23C[C@]4(CO2)[C@@H]([C@H]3[C@@]1(C)O)CC[C@H]5[C@]4(CC[C@@H]6[C@@]5(CC[C@@H](C6(C)C)O[C@H]7[C@@H]([C@H]([C@H](CO7)O)O[C@H]8[C@@H]([C@H]([C@@H]([C@H](O8)COS(=O)(=O)O)O)O)O)O)C)C)C	4.2e-06	1.3	15922618	50	2.753	Triterpenes
PS(22:2(13Z,16Z)/22:6(4Z,7Z,10Z,13Z,16Z,19Z))	AAEHIVYIVPNEDF-MKJHNSTASA-N	52925896	CCCCC/C=C\C/C=C\CCCCCCCCCCCC(=O)OC[C@H](COP(=O)(O)OC[C@@H](C(=O)O)N)OC(=O)CC/C=C\C/C=C\C/C=C\C/C=C\C/C=C\C/C=C\CC	5.5e-05	0.84	52925896	2	14.567	Phosphatidylserines
anhydroretinol	FWNRILWHNGFAIN-OYUWDNMLSA-N	5287678	CC\1=CCCC(/C1=C\C=C(/C)\C=C\C=C(/C)\C=C)(C)C	8.1e-05	2.5	5287678	40	7.759	Carotenoids	A
Aselacin B	YUBIUAUSTIXPQN-UHFFFAOYNA-N	9811589	C[C@@H]1[C@@H](C(=O)NCCC(=O)N[C@@H](C(=O)N[C@@H](C(=O)NCC(=O)O1)CO)CC2=CNC3=CC=CC=C32)NC(=O)[C@@H](CCC(=O)N)NC(=O)CCCCCCCC(=O)/C=C/C=C/CCCC(C)O	0.0095	1	9811589	101	2.214	Indoles
PG(18:2(9Z,12Z)/13:0)	LEQIXGBEZBNXGA-SJZURPHPNA-N	52926606	CCCCCCCCCCCCC(=O)O[C@H](COC(=O)CCCCCCC/C=C\C/C=C\CCCCC)COP(=O)(O)OC[C@H](CO)O	6.1e-05	3	52926606	12	11.397	Phosphatidylglycerols	N
3-(8,11,14-Pentadecatrienyl)phenol	JOLVYUIAMRUBRK-AOSYACOCSA-N	5356112	C=CC/C=C/C/C=C/CCCCCCCC1=CC(=CC=C1)O	8.4e-05	3.3	5356112	6	8.179	Phenols
Diacarnoxide B	VCZNGUOXJKTDBG-ZXULBAAINA-N	16104922	C[C@@H]([C@H]1CC[C@](OO1)(C)CCCC(C)CCC2C(=C)CCCC2(C)C)C(=O)O	8.4e-05	3.4	16104922	10	8.255	Peroxides
Belladonnine	GERIGMSHTUAXSI-VSFMPYMYNA-N	442995	CN1C2CCC1CC(C2)OC(=O)[C@H]3CC[C@@](C4=CC=CC=C34)(C5=CC=CC=C5)C(=O)OC6CC7CCC(C6)N7C	9.3e-05	3.1	442995	79	5.073	Solanaceous Alkaloids	v
PIM4(18:0/14:0)	KPSAUYDRFVIHER-DFYVJYBZNA-N	126457526	CCCCCCCCCCCCCCCCCC(=O)OC[C@H](COP(=O)(O)O[C@H]1[C@@H](C([C@@H](C(C1O[C@H]2[C@H](C([C@H](C(O2)CO[C@H]3[C@H](C([C@H](C(O3)CO[C@H]4[C@H](C([C@H](C(O4)CO)O)O)O)O)O)O)O)O)O)O)O)O)O[C@@H]5[C@@H](C([C@@H](C(O5)CO)O)O)O)OC(=O)CCCCCCCCCCCCC	0.00025	3.5	126457526	51	6.225
Lyciumoside IV	OEOWMDSFDQHCFJ-IDGBGVIZNA-N	71296134	C[C@H]1[C@@H]([C@H]([C@H]([C@@H](O1)O[C@@H]2[C@H](O[C@H]([C@@H]([C@H]2O)O)O[C@@](C)(CC/C=C(\C)/CC/C=C(\C)/CC/C=C(/C)\CO[C@H]3[C@@H]([C@H]([C@@H]([C@H](O3)CO)O)O)O)C=C)CO)O)O)O	6.5e-05	0.86	71296134	22	0.752	Glycolipids
Bismurrayafoline E	OUSUKIXJVMBEMB-YAGSLNJISA-N	101150699	CC1=CC2=C(NC3=C2C=CC(=C3C/C=C(/CCC=C(C)C)\C)OC)C(=C1O)C4=C(C(=CC5=C4NC6=C5C=CC(=C6C/C=C(/CCC=C(C)C)\C)OC)C)O	0.0003	6.4	101150699	35	10.534	Carbazoles
Borassoside A	CLBAIZZJADAEOT-HYYICUQVNA-N	16204068	C[C@H]1CC[C@@]2([C@H]([C@H]3[C@@H](O2)C[C@@H]4[C@@]3(CC[C@H]5[C@H]4CC=C6[C@@]5(CC[C@@H](C6)O[C@H]7[C@@H]([C@H]([C@@H]([C@H](O7)CO)O[C@H]8[C@@H]([C@@H]([C@H]([C@@H](O8)C)O[C@H]9[C@@H]([C@@H]([C@H]([C@@H](O9)C)O)O)O)O)O)O)O)C)C)C)OC1	2.7e-07	0.77	16204068	14	2.836	Saponins	H
(S)-9-Hydroxy-10-undecenoic acid	CJUFNYIRKDOQMC-UHFFFAOYNA-N	73242170	C=C[C@H](CCCCCCCC(=O)O)O	0.0088	1.1	73242170	57	2.54	DiHODE
Melissoidesin D	DTXLHTNLCVLTBV-WKVJHDRJNA-N	102121392	CCOC[C@@H]1[C@@H]2C[C@@H]([C@H]3[C@@]4([C@H](C[C@@H](C([C@H]4[C@H]([C@@H]([C@]3(C2)C1=O)O)OC(=O)C)(C)C)OC(=O)C)O)C)O	1.9e-06	1.3	102121392	103	0.323	Glycosides	E
Steviobioside	OMHUCGDTACNQEX-UHFFFAOYNA-N	44661945	C[C@]12CCC[C@](C1CCC34C2CCC(C3)(C(=C)C4)O[C@H]5[C@@H]([C@H]([C@@H]([C@H](O5)CO)O)O)O[C@H]6[C@@H]([C@H]([C@@H]([C@H](O6)CO)O)O)O)(C)C(=O)O	0.0004	1.3	44661945	56	1.349	Diterpenes, Kaurane
PIM4(18:1(9Z)/14:0)	MENRSQMXLZVPNJ-BTMGXHLSNA-N	126457532	CCCCCCCCCCCCCC(=O)O[C@H](COC(=O)CCCCCCC/C=C\CCCCCCCC)COP(=O)(O)O[C@H]1[C@@H](C([C@@H](C(C1O[C@H]2[C@H](C([C@H](C(O2)CO[C@H]3[C@H](C([C@H](C(O3)CO[C@H]4[C@H](C([C@H](C(O4)CO)O)O)O)O)O)O)O)O)O)O)O)O)O[C@@H]5[C@@H](C([C@@H](C(O5)CO)O)O)O	6.5e-06	2.1	126457532	51	5.709	Phosphatidylinositols
Namonin E	JNGDBBPABQCYEV-YAVKXCRYNA-N	10964186	C[C@H]1[C@@H]([C@H]([C@H]([C@@H](O1)O[C@@H]2[C@H]([C@H](CO[C@H]2O[C@@H]3C[C@@H](CC4=CC[C@@H]5[C@@H]([C@@]34C)CC[C@]6([C@H]5C[C@H]7[C@@H]6C(=C(O7)CC[C@@H](C)CO[C@H]8[C@@H]([C@H]([C@@H]([C@H](O8)CO)O)O)O)C)C)O)OC(=O)C)O[C@H]9[C@@H]([C@H]([C@@H](CO9)O)O)O)O)O)O	0.00012	1.1	10964186	14	0.029	Saponins	H
Karatavigenin B	HBGXWELPRPGLBB-DYMIFXPONA-N	52931437	C[C@@H]1CC[C@@]2([C@H]([C@H]3[C@@H](O2)C[C@@H]4[C@@]3(CC[C@H]5[C@H]4C[C@H]([C@@]6([C@@]5(C[C@H]([C@@H](C6)O)OC(=O)C7=CC=CC=C7)C)O)O)C)C)OC1	0.00079	1.2	52931437	26	5.301	Diterpenes
Virescenoside R	QLNIKMOZYWMKSZ-GVKXSJNZNA-N	21580219	C[C@@]1(CC[C@H]2C(=CC[C@@H]3[C@@]2(C[C@H]([C@@H]([C@]3(C)CO[C@H]4[C@H]([C@@H]([C@@H]([C@H](O4)CO[C@@H]5[C@@H]([C@H]([C@@H]([C@H](O5)CO)O)O)O)O)O)O)O)O)C)C1)C=C	9.8e-07	1.4	21580219	15	1.714	Saponins	u
Cladionol A	GRDLKOZEWJLCMH-MOFZLMBUNA-N	11445870	CCC(C)CC(C)CC(C)C(C(C)/C=C(\C)/C(C(C)/C=C(\C)/C(C(C)/C=C(\C)/C(C(C)C(=O)OC[C@H]([C@@H]([C@@H](CO)O)O)O)O)O)O)O[C@H]1[C@H]([C@H]([C@@H]([C@H](O1)COC(=O)C)O)O)O	0.00019	1.4	11445870	33	1.997	Macrolides
Withanoside III	RRWWSMHWDKRGQC-SNBSLISYNA-N	101168810	CC1=C(C(=O)O[C@H](C1)[C@@H](C)[C@H]2CC[C@@H]3[C@@]2(CC[C@H]4[C@H]3[C@H]5[C@H](O5)[C@@]6([C@@]4([C@H](C[C@@H](C6)O[C@H]7[C@@H]([C@H]([C@@H]([C@H](O7)CO)O)O)O)O)C)O)C)CO	7.5e-08	1.5	101168810	61	2.093	Withanolides
Sansevistatin 1	DFNXUPWTNVNPER-GQUTYCHTNA-N	11263018	C[C@H]1[C@H]2[C@H](C[C@@H]3[C@@]2(CC[C@H]4[C@H]3CC=C5[C@@]4(CC[C@@H](C5)O[C@H]6[C@@H]([C@H]([C@@H]([C@H](O6)CO)O[C@H]7[C@@H]([C@@H]([C@H]([C@@H](O7)C)O)O)O)O)O[C@H]8[C@@H]([C@@H]([C@H]([C@@H](O8)C)O)O)O)C)C)O[C@]19CCC(=C)CO9	8.5e-06	0.64	11263018	14	2.119	Spirostans	H
PE(20:5(5Z,8Z,11Z,14Z,17Z)/14:0)	OQWZPIYVNUSNLG-KQKHHBPSSA-N	52924665	CCCCCCCCCCCCCC(=O)O[C@H](COC(=O)CCC/C=C\C/C=C\C/C=C\C/C=C\C/C=C\CC)COP(=O)(O)OCCN	0.00026	0.87	52924665	5	12.728	Phosphatidylethanolamines
Funingenoside A	UTLCYLWFMDQSCF-MCKLOLJSNA-N	101254625	C[C@H]1[C@@H]([C@@H](C[C@@H](O1)O[C@H]2CC[C@]3([C@H]([C@H]2COC(=O)C)CC[C@]45[C@H]3CC[C@@](C4=O)([C@H](CC5)CC6=CC(=O)OC6)C)C)OC)O[C@H]7[C@@H]([C@H]([C@@H]([C@H](O7)CO[C@H]8[C@@H]([C@H]([C@@H]([C@H](O8)CO)O)O)O)O)O)O	7.6e-05	3	101254625	4	0.977	Saponins	J
PI(O-16:0/18:1(9Z))	QXAIBJDDPUXXJM-CXBQSTIKNA-N	52928507	CCCCCCCCCCCCCCCCOC[C@H](COP(=O)(O)OC1C([C@@H](C(C(C1O)O)O)O)O)OC(=O)CCCCCCC/C=C\CCCCCCCC	8.4e-05	3.3	52928507	23	13.302	Phosphatidylinositols
Falcarinone	UQEBOJRXTNLPKZ-ZHACJKMWSA-N	5281150	CCCCCCC/C=C\CC#CC#CC(=O)C=C	2.4e-06	0.72	5281150	82	6.657
epoxomicin	DOGIDQKFVLKMLQ-FOIHFKJPNA-N	11226684	CC[C@H](C)[C@@H](C(=O)N[C@@H]([C@@H](C)O)C(=O)N[C@@H](CC(C)C)C(=O)[C@]1(CO1)C)NC(=O)[C@H]([C@@H](C)CC)N(C)C(=O)C	0.0035	1.2	11226684	108	1.815	Oligopeptides	R
PE(14:1(9Z)/16:1(9Z))	ZXHZOZOKRSLOIE-HMDBOOPKSA-N	52924133	CCCCCC/C=C\CCCCCCCC(=O)O[C@H](COC(=O)CCCCCCC/C=C\CCCC)COP(=O)(O)OCCN	0.00018	0.86	52924133	5	11.244	Phosphatidylethanolamines
Leptofuranin C	WEMVPZVMDSGXDU-YGIRKTDUNA-N	9827697	CC1CC(OC1C(C)C(=O)C(C)/C=C(\C)/C=C/CC(C)/C=C(/C)\C=C\C2C(C=CC(=O)O2)C)(C)CC=O	0.023	1.1	9827697	74	6.876	Pyrones
Methyl jasmonate	GEWDNTWNSAZUDX-WQMVXFAESA-N	5281929	CC/C=C\C[C@@H]1[C@H](CCC1=O)CC(=O)OC	0.00011	1.3	5281929	110	2.139	Cyclopentanes
4-Coumaryl alcohol	PTNLHDGQWUGONS-OWOJBTEDSA-N	5280535	C1=CC(=CC=C1/C=C/CO)O	0.0034	0.93	5280535	6	0.655	Phenols
PGP(16:0/20:3(8Z,11Z,14Z))	OFOWZJMRNRECQR-WQQWEMLQSA-N	53481801	CCCCCCCCCCCCCCCC(=O)OC[C@H](COP(=O)(O)OC[C@H](COP(=O)(O)O)O)OC(=O)CCCCCC/C=C\C/C=C\C/C=C\CCCCC	7e-06	0.78	53481801	12	12.686	Phosphatidylethanolamines	N
3beta-[(beta-D-glucopyranosyl)oxy]-17alpha-hydroxy-16beta-[(O-(2-O-3,4,5-trimethoxybenzoyl-beta-D-xylopyranosyl)-(1->3)-2-O-acetyl-alpha-L-arabinopyranosyl)oxy]cholest-5-en-22-one	FLAULGUSZSPUPV-FDKPUIKUSA-N	70697763	C[C@@H](C(=O)CCC(C)C)[C@]1([C@H](C[C@@H]2[C@@]1(CC[C@H]3[C@H]2CC=C4[C@@]3(CC[C@@H](C4)O[C@H]5[C@@H]([C@H]([C@@H]([C@H](O5)CO)O)O)O)C)C)O[C@H]6[C@@H]([C@H]([C@H](CO6)O)O[C@H]7[C@@H]([C@H]([C@@H](CO7)O)O)OC(=O)C8=CC(=C(C(=C8)OC)OC)OC)OC(=O)C)O	3.7e-05	1.3	70697763	60	3.536	Saponins
Lovastatin hydroxy acid observed in lovastatin standard	CPXUZWJJNBFVEE-WAKBTOJMNA-N	64727	CC[C@H](C)C(=O)O[C@H]1C[C@H](C=C2[C@H]1[C@H]([C@H](C=C2)C)CC[C@H](C[C@H](CC(=O)O)O)O)C	0.00073	3.6	64727	74	3.754
PG(14:1(9Z)/15:1(9Z))	BAWDIQRVSWNRPE-UNJOEJKZNA-N	52926378	CCCCC/C=C\CCCCCCCC(=O)O[C@H](COC(=O)CCCCCCC/C=C\CCCC)COP(=O)(O)OC[C@H](CO)O	0.0061	0.85	52926378	12	10.07	Phosphatidylglycerols	N
Gerronemin E	GRNMSFHYESOOJH-QGXVWARISA-N	5317578	C1=CC(=C(C(=C1)O)O)CCCCCCC/C=C\C/C=C\CCC2=C(C(=CC=C2)O)O	8e-05	3.7	5317578	91	7.963	Catechols
Mesobilirubinogen	OBHRVMZSZIDDEK-UHFFFAOYNA-N	26818	CCC1=C(C(=O)NC1CC2=C(C(=C(N2)CC3=C(C(=C(N3)CC4C(=C(C(=O)N4)CC)C)C)CCC(=O)O)CCC(=O)O)C)C	8.4e-05	3.6	26818	65	1.319	Bile Pigments
PA(18:3(9Z,12Z,15Z)/18:0)	XRZJERJYZPMSBZ-SMTKHEEVSA-N	52928998	CCCCCCCCCCCCCCCCCC(=O)O[C@H](COC(=O)CCCCCCC/C=C\C/C=C\C/C=C\CC)COP(=O)(O)O	9.1e-05	3.8	52928998	3	14.777	Phosphatidic Acids	K
Digonazole	UTUBLIPCJHOMFB-UHFFFAOYNA-N	23427998	CCCCCCCCCCCCCCCCCCCCC(=O)O[C@H](C[C@@H]([C@@H]([C@H](C)O)O)O)C1=COC(=N1)CC2=CN=CO2	0.0012	1.1	23427998	78	9.073		I
Daedaleaside D	RSBAXXTZWHYISF-OQWXSBENNA-N	11239378	CC(C)C(=C)CC[C@H]([C@H]1[C@@H](C[C@@]2([C@@]1(CCC3=C2CC[C@@H]4[C@@]3(CCC(=O)C4(C)C)C)C)C)OC(=O)C)C(=O)O[C@H]5[C@@H]([C@H]([C@@H]([C@H](O5)CO)O)O)O	0.00036	1.6	11239378	31	5.518	Glucosides
Blumenol B	CWOFGGNDZOPNFG-RLQDDWLSNA-N	14135402	CC1=CC(=O)CC([C@]1(CC[C@@H](C)O)O)(C)C	8.1e-05	2	14135402	8	0.528		o
Capric acid	GHVNFZFCNZKVNT-UHFFFAOYSA-N	2969	CCCCCCCCCC(=O)O	8.6e-05	2.9	2969	46	4.156	Saturated FA	L
alpha-Corocalene	VTUZIFHLLUSULC-UHFFFAOYSA-N	5316074	CC1=CC2=C(C=CC(=C2CC1)C)C(C)C	0.00011	2.6	5316074	28	5.117	Xylenes	t
PI(O-18:0/16:1(9Z))	CSXYLBJXZWGCHI-KKUWFWSHNA-N	52928487	CCCCCCCCCCCCCCCCCCOC[C@H](COP(=O)(O)OC1C([C@@H](C(C(C1O)O)O)O)O)OC(=O)CCCCCCC/C=C\CCCCCC	0.00011	2.7	52928487	23	13.302	Phosphatidylinositols
Cussoracoside F	VYFWQMKVBRGECE-BBBGBDLHNA-N	102303560	C[C@@]12CC[C@@H]([C@]([C@H]1CC[C@]34[C@H]2CC[C@H](C3)C(=C)C4)(C)C(=O)O[C@H]5[C@@H]([C@H]([C@@H]([C@H](O5)CO[C@H]6[C@@H]([C@](CO6)(CO)O)O)O)O)O)O	1.3e-07	0.4	102303560	56	2.963	Triterpenes
Momordicoside G	MQGABSJZVJOSCX-OQLLNIDSNA-N	91895422	C[C@H](C/C=C/C(C)(C)OC)[C@H]1CC[C@@]2([C@@]1(CC[C@]34[C@H]2C=C[C@]5([C@H]3CC[C@@H](C5(C)C)O[C@H]6[C@@H]([C@@H]([C@@H]([C@H](O6)CO)O)O)O)OC4)C)C	0.00053	0.8	91895422	15	6.908	Glycosides	u
Cyprodinil	OTXANOLOOUNVSR-UHFFFAOYSA-N	86367	CC1=CC(=NC(=N1)NC2=CC=CC=C2)C3CC3	0.048	0.93	86367	29	1.064	Pyrimidines	n
Chrymutasin A	JRLWNUGRLOAQEN-OXIKRAQONA-N	135466899	C[C@@H]1[C@@H]([C@@H]([C@H]([C@@H](O1)OC2=CC=CC3=C2C4=C5C6=C(C=CC(=C6C(=O)O4)C)C(=O)C(=N)C5=C3O)O[C@@H]7[C@@H]([C@H]([C@H]([C@H](O7)C)O)OC)O)O)O	0.004	1.1	135466899	1	-0.54	Benzopyrans
PA(19:1(9Z)/17:2(9Z,12Z))	LTZBUUBMMMLULI-XNUCCUOYNA-N	52929081	CCCCCCCCC/C=C\CCCCCCCC(=O)OC[C@H](COP(=O)(O)O)OC(=O)CCCCCCC/C=C\C/C=C\CCCC	0.00036	1.7	52929081	3	14.588	Phosphatidic Acids	K
DG(19:1(9Z)/22:4(7Z,10Z,13Z,16Z)/0:0)[iso2]	DZKRHXPDRRFIDM-BGJOTNHTNA-N	56936425	CCCCCCCCC/C=C\CCCCCCCC(=O)OC[C@H](CO)OC(=O)CCCCC/C=C\C/C=C\C/C=C\C/C=C\CCCCC	2.3e-06	2.4	56936425	45	18.008	Glycerides
Rhodopin glucoside	WEELHWARVOLEJX-WPLVGOEFNA-N	447386	CC(=CCC/C(=C/C=C/C(=C/C=C/C(=C/C=C/C=C(\C)/C=C/C=C(\C)/C=C/C=C(\C)/CCCC(C)(C)O[C@H]1[C@@H]([C@H]([C@@H]([C@H](O1)CO)O)O)O)/C)/C)/C)C	0.0001	3.2	447386	22	12.37	Epoxy FA_46
PI(P-18:0/20:2(11Z,14Z))	VNORBODRQREIMG-BKEHJXRINA-N	52928556	CCCCCCCCCCCCCCCC/C=C\OC[C@H](COP(=O)(O)OC1C([C@@H](C(C(C1O)O)O)O)O)OC(=O)CCCCCCCCC/C=C\C/C=C\CCCCC	9.8e-05	3	52928556	23	15.482	Phosphatidylinositols
PG(21:0/17:0)	BDCQSBKXGUEMPI-WMQSFMSKNA-N	52926947	CCCCCCCCCCCCCCCCCCCCC(=O)OC[C@H](COP(=O)(O)OC[C@H](CO)O)OC(=O)CCCCCCCCCCCCCCCC	9.4e-05	3	52926947	54	16.223	Phosphatidylglycerols
Spinosyn A	SRJQTHAZUNRMPR-SBOQKJDQNA-N	443059	CC[C@H]1CCC[C@@H]([C@H](C(=O)C2=C[C@H]3[C@@H]4C[C@@H](C[C@H]4C=C[C@H]3[C@@H]2CC(=O)O1)O[C@H]5[C@@H]([C@@H]([C@H]([C@@H](O5)C)OC)OC)OC)C)O[C@H]6CC[C@@H]([C@H](O6)C)N(C)C	2.8e-05	2.9	443059	41	4.161	Macrolides
Ritterazine E	CAXQCKNMQDGMFL-UHFFFAOYNA-N	10463532	C[C@H]1C[C@@]2([C@H]([C@H]3[C@@H](O2)C[C@]4([C@@]3(C)O)[C@@H]5CC[C@H]6CC7=C(C[C@@]6([C@H]5CC4=O)C)N=C8C[C@@H]9C[C@@H]([C@@H]2[C@@H]([C@]9(CC8=N7)C)C[C@H]([C@]3(C2=C[C@H]2[C@@]3([C@@H]([C@]3(O2)CC[C@](CO3)(C)O)C)O)C)O)O)C)OC1(C)C	9.6e-05	2.9	10463532	30	3.407	Hydrocarbons, Cyclic
Caseamembrin C	BOVQULZBTRBINP-ZSURLNEPNA-N	101345257	CCCC(=O)O[C@H]1C2=C[C@H](C[C@H]3[C@@]2([C@@H]([C@@H]([C@@H]([C@@]3(C)CCC(=C)C=C)C)O)O)[C@H](O1)OC(=O)C)OC(=O)C(C)CC	6.5e-05	6.1	101345257	61	5.571	Diterpenes
Sterebin A	GUVJPXABQYFWPD-BQYQJAHWNA-N	71694416	CC(=O)/C=C/[C@@H]1[C@]2(CCCC(C2[C@H]([C@@H]([C@@]1(C)O)O)O)(C)C)C	4.8e-08	2	71694416	8	3.575		o
PG(18:4(6Z,9Z,12Z,15Z)/20:5(5Z,8Z,11Z,14Z,17Z))	FMCKRYLEGOKPJI-IGGKTRHTNA-N	52926714	CC/C=C\C/C=C\C/C=C\C/C=C\CCCCC(=O)OC[C@H](COP(=O)(O)OC[C@H](CO)O)OC(=O)CCC/C=C\C/C=C\C/C=C\C/C=C\C/C=C\CC	0.0042	1.3	52926714	85	12.902	Glycerides
3b-Allotetrahydrocortisol	AODPIQQILQLWGS-VSJLKEFSSA-N	12444612	C[C@]12CC[C@@H](C[C@@H]1CC[C@@H]3[C@@H]2[C@H](C[C@]4([C@H]3CC[C@@]4(C(=O)CO)O)C)O)O	2.5e-07	0.19	12444612	13	1.825	11-Hydroxycorticosteroids	x
Dihydrocortisol	ACSFOIGNUQUIGE-AIPUTVCKSA-N	164838	C[C@]12CCC(=O)C[C@H]1CC[C@@H]3[C@@H]2[C@H](C[C@]4([C@H]3CC[C@@]4(C(=O)CO)O)C)O	9.8e-07	2.4	164838	13	1.416	11-Hydroxycorticosteroids	x
DHBOA-Glc	VUFDXOACUHDTLI-UHFFFAOYNA-N	592555	C1=CC2=C(C=C1O)OC(C(=O)N2)OC3C(C(C(C(O3)CO)O)O)O	2.7e-05	0.2	592555	114	-1.561
Azoxystrobin	TVJHJRXOIAMNSY-YADHBBJMSA-N	3034285	CO/C=C(\C1=CC=CC=C1OC2=NC=NC(=C2)OC3=CC=CC=C3C#N)/C(=O)OC	1.4e-05	0.25	3034285	21	1.444	Methacrylates
Withanoside VI	MKCYAASFWFGIJK-PCLQJQBRNA-N	91827019	CC1=C(C(=O)O[C@H](C1)[C@@](C)([C@H]2CC[C@@H]3[C@@]2(CC[C@H]4[C@H]3CC=C5[C@@]4([C@H](C[C@@H](C5)O[C@H]6[C@@H]([C@H]([C@@H]([C@H](O6)CO[C@H]7[C@@H]([C@H]([C@@H]([C@H](O7)CO)O)O)O)O)O)O)O)C)C)O)C	1.7e-05	0.15	91827019	61	1.363	Cardenolides
Tricyclodehydroisohumulone	FZQFCXBBPNGZEI-ZDIWIDOKNA-N	442926	CC(C)CC(=O)C1=C([C@]23C[C@@H](C([C@H]2CC(=O)[C@@]3(C1=O)O)(C)C)C(=C)C)O	3.3e-07	14	442926	43	3.64
Atratoglaucoside A	FMBUMRDTMFABLR-AJYUZISRNA-N	101109728	C[C@H]1[C@@H]([C@H](C[C@@H](O1)O[C@@H]2[C@H](O[C@H]([C@@H]([C@H]2OC)O)O[C@H]3CC[C@@]4(C5CCC6=CO[C@@]7(C6C(CO7)OC(=O)C5CC=C4C3)C)C)C)O)O	2.7e-05	0.069	101109728	31	1.235	Steroids
Gibbilimbol B	RQVUFITWWLNDGP-BQYQJAHWSA-N	10014185	CCCCCC/C=C/CCC1=CC=C(C=C1)O	0.00024	1.5	10014185	6	5.838	Phenols
Annosquamosin G	BPTFMXPYKVCKDB-ULONZFNLNA-N	11034695	C[C@@]12CCC[C@]([C@H]1CC[C@]34[C@H]2CC[C@H](C3)[C@@](C4)(CO)O)(C)OO	8.5e-05	1.8	11034695	13	3.582	Diterpenes	x
Prostaglandin F1a	DZUXGQBLFALXCR-CDIPTNKSSA-N	5280939	CCCCC[C@@H](/C=C/[C@H]1[C@@H](C[C@@H]([C@@H]1CCCCCCC(=O)O)O)O)O	4.9e-06	8.5	5280939	110	3.719	Prostaglandins F
C17 sphingosine(1+)	RBEJCQPPFCKTRZ-LHMZYYNSSA-O	71581052	CCCCCCCCCCCC/C=C/[C@H]([C@H](CO)[NH3+])O	0.00015	3	71581052	115	5.983	Ethanolamines	S
PA(P-16:0e/18:2(9Z,12Z))	OLCTYLMZTXKGKH-BBNWHMLASA-N	52929743	CCCCCCCCCCCCCC/C=C\OC[C@H](COP(=O)(O)O)OC(=O)CCCCCCC/C=C\C/C=C\CCCCC	2.8e-05	2.4	52929743	3	14.504	Phosphatidic Acids	K
Morusimic acid D	OPRYWCSVGFCHJA-KDYIFSSHNA-N	10871219	C[C@H]1[C@@H](CC[C@H](N1)CCCCCCCCC[C@H](CC(=O)O)O)O	6.1e-05	1.5	10871219	18	3.729	Piperidines	b
8(R)-Hydroperoxylinoleic acid	RGJSGXNKRWWCOQ-QMEIEYGNSA-N	6438758	CCCCC/C=C\C/C=C\[C@@H](CCCCCCC(=O)O)OO	0.00086	1.4	6438758	57	6.096	DiHODE
Gibbilimbol A	LMJPVRXXPPOFAM-VOTSOKGWSA-N	10263365	CCCCC/C=C/CCCC1=CC=C(C=C1)O	0.0001	2.4	10263365	6	5.838	Phenols
Phomopsichalasin	AEKBQYOSHUYACR-HUBYWGRONA-N	139583786	C[C@H]1CC[C@H]2[C@H]3[C@@H](C(=C[C@@]2(C1)C)C)[C@]4(C=C([C@H]([C@@H]5[C@]4(C3=O)C(=O)N[C@]5(CC6=CC=C(C=C6)O)O)C)C)C	8e-05	2.1	139583786	42	5.096	Indoles	g
N,N-dimethyl-Safingol	BYBHBTCYJMUUDZ-YLBUIOQXNA-N	42608375	CCCCCCCCCCCCCCC[C@@H]([C@H](CO)N(C)C)O	4e-05	0.19	42608375	72	6.897		Q
(S)-[8]-Gingerol	BCIWKKMTBRYQJU-UHFFFAOYNA-N	5275725	CCCCCCCC(CC(=O)CCC1=CC(=C(C=C1)O)OC)O	7.7e-07	10	5275725	92	3.575	Catechols
Methyl (R)-8-Hydroxy-9-decene-4,6-diynoate glucoside	AVPBONMPAMZUKG-UHFFFAOYNA-N	131752979	COC(=O)CCC#CC#CC(C=C)OC1C(C(C(C(O1)CO)O)O)O	0.026	0.74	131752979	47	-0.12
Spinasaponin A	BQPYEFAVIPEQIK-UHFFFAOYNA-N	441951	C[C@]12CC[C@@H](C([C@@H]1CC[C@@]3([C@@H]2CC=C4[C@]3(CC[C@@]5([C@H]4CC(CC5)(C)C)C(=O)O)C)C)(C)C)O[C@H]6[C@@H]([C@H]([C@@H]([C@H](O6)C(=O)O)O)O[C@H]7[C@@H]([C@H]([C@@H]([C@H](O7)CO)O)O)O)O	4.9e-06	0.29	441951	4	6.135	Saponins	J
3,3',4,4'-Tetrahydroxy-5,5'-diisopropyl-2,2'-dimethylbiphenyl	BUKCOURGDZTOBF-UHFFFAOYSA-N	642531	CC1=C(C(=C(C=C1C2=CC(=C(C(=C2C)O)O)C(C)C)C(C)C)O)O	0.00018	1.4	642531	91	4.58	Catechols
Longithorol E	PHULLDGGFWVHPH-WNVBHWFWNA-N	100942100	C/C/1=C\CCC2(C=CC3=C(O2)C=C(C/C(=C/CC1)/C)C(=C3)O)C	1.6e-06	0.54	100942100	99	4.608	Benzopyrans
Gypsogenin 3-O-rhamnosylglucuronide	OLFGQBKWRYLUAQ-DEYGWBDUNA-N	441927	C[C@H]1[C@@H]([C@H]([C@H]([C@@H](O1)O[C@H]2[C@@H]([C@H](O[C@H]([C@@H]2O)O[C@H]3CC[C@]4([C@H]([C@]3(C)C=O)CC[C@@]5([C@@H]4CC=C6[C@]5(CC[C@@]7([C@H]6CC(CC7)(C)C)C(=O)O)C)C)C)C(=O)O)O)O)O)O	4.7e-06	0.074	441927	4	5.813	Saponins	J
PE(15:0/20:1(11Z))	DAZYZDVAACSMFA-DYFSFZQGSA-N	52924167	CCCCCCCCCCCCCCC(=O)OC[C@H](COP(=O)(O)OCCN)OC(=O)CCCCCCCCC/C=C\CCCCCCCC	0.0055	0.88	52924167	5	14.605	Phosphatidylethanolamines
All-trans-heptaprenyl diphosphate	LSJLEXWXRKTZAJ-YUIIPXGZNA-N	5280658	CC(=CCC/C(=C/CC/C(=C/CC/C(=C/CC/C(=C/CC/C(=C/CC/C(=C/COP(=O)(O)OP(=O)(O)O)/C)/C)/C)/C)/C)/C)C	8.7e-05	0.5	5280658	111	9.176	O=FA_35_8	C
PE(P-16:0/14:1(9Z))	BEOOYKHWLKFXRC-IEGLPGIQSA-N	52925043	CCCCCCCCCCCCCC/C=C\OC[C@H](COP(=O)(O)OCCN)OC(=O)CCCCCCC/C=C\CCCC	0.00018	2.5	52925043	24	12.298	Phosphatidylethanolamines
LPE 18:2	SVRBKLJIDJHADS-USWSLJGRSA-N	52925130	CCCCC/C=C\C/C=C\CCCCCCCC(=O)OC[C@H](COP(=O)(O)OCCN)O	0.0012	0.34	52925130	5	5.319	Phosphatidylethanolamines
Munchiwarin	HBTGYTAWTFVIRO-QKOOUZAANA-N	6536697	CC(=CCC1=C/C(=C(\C=C\C2=CC=C(C=C2)O)/O)/C(=O)C(C1=O)(CC=C(C)C)CC=C(C)C)C	1.3e-06	0.094	6536697	6	6.244	Flavonoids
PS(20:4(5Z,8Z,11Z,14Z)/22:6(4Z,7Z,10Z,13Z,16Z,19Z))	KJECAXDORGQZQA-XRQJXPHHSA-N	52926084	CCCCC/C=C\C/C=C\C/C=C\C/C=C\CCCC(=O)OC[C@H](COP(=O)(O)OC[C@@H](C(=O)O)N)OC(=O)CC/C=C\C/C=C\C/C=C\C/C=C\C/C=C\C/C=C\CC	4.7e-08	0.27	52926084	2	12.775	Phosphatidylethanolamines
8-Methylsulfinyloctyl glucosinolate	GPMDJOOLATZDQL-YXBJVNSWNA-N	46173880	CS(=O)CCCCCCCCC(=NOS(=O)(=O)O)S[C@H]1[C@@H]([C@H]([C@@H]([C@H](O1)CO)O)O)O	4.8e-05	2.3	46173880	20	-0.867		f
N-Undecanoylglycine	HEUQYIQQCNOXOG-UHFFFAOYSA-N	454092	CCCCCCCCCCC(=O)NCC(=O)O	3.3e-05	0.28	454092	11	3.897	Saturated_Fatty Acids	e
1-Acetoxy-2-hydroxy-16-heptadecyn-4-one	HZHSVQVECJXVRP-UHFFFAOYNA-N	6710762	CC(=O)OCC(CC(=O)CCCCCCCCCCCC#C)O	8.7e-07	6.3	6710762	16	4.751	O=FA_19_1	j
Semiplenamide E	HMEVPMUFHLUBFU-OZYIIZIHNA-N	11463588	CCCCCCCCCCCCCCC/C=C(\C)/C(=O)N[C@@H](C)COC(=O)C	6.3e-05	0.42	11463588	76	9.059		O
Garcinielliptone FA	MTCPKFHUPWTJSP-ILKCVVHLNA-N	11223975	CC(=CC[C@H](CCC(=C)C)[C@@H](C(=C)C)[C@](C)(CC=C(C)C)C(=O)C1=CC(=CC=C1)O)C	0.0011	0.58	11223975	66	7.811	Benzophenones	i
PE(P-16:0/15:1(9Z))	YGXCGMXZNIDWDO-AHITUGANNA-N	52925045	CCCCCCCCCCCCCC/C=C\OC[C@H](COP(=O)(O)OCCN)OC(=O)CCCCCCC/C=C\CCCCC	0.0049	1.2	52925045	24	12.867	Phosphatidylethanolamines
LysoSM(d18:0)	GSEOJHIBPQRSNH-XZOQPEGZSA-N	44260122	CCCCCCCCCCCCCCC[C@H]([C@H](COP(=O)([O-])OCC[N+](C)(C)C)N)O	0.0063	0.65	44260122	72	5.22		Q
4a-Methylzymosterol	FOUJWBXBKVVHCJ-YIJYGBTNSA-N	22212495	C[C@H]1[C@@H]2CCC3=C([C@]2(CC[C@@H]1O)C)CC[C@]4([C@H]3CC[C@@H]4[C@H](C)CCC=C(C)C)C	0.045	0.88	22212495	96	9.403	Cholestadienols
Gibberellin A12	UJFQJDAESQJXTG-NIILLQMYNA-N	443450	C[C@@]12CCC[C@@]([C@H]1[C@@H]([C@]34[C@H]2CC[C@H](C3)C(=C)C4)C(=O)O)(C)C(=O)O	0.0053	1.5	443450	10	4.69	Gibberellins
Kurilensoside H	SOVMHZODGWLPJC-ZDVPKGLUNA-N	52931571	C[C@@H](CCC[C@@H](C)[C@H]1[C@H]([C@@H]([C@@H]2[C@@]1(CC[C@H]3[C@]2(C[C@H]([C@@]45[C@@]3(CC[C@@H]([C@@H]4O5)O[C@H]6[C@H](C([C@@H](CO6)O)O)O)C)O)O)C)O)O)CO	5.5e-05	2.5	52931571	25	1.706	Steroids
Apo-12'-violaxanthal	CAXVJDRXJFKYQP-RXCALXPUNA-N	131751642	C/C(=C\C=C\C=C(\C)/C=O)/C=C/C=C(/C)\C=C\C12C(CC(CC1(O2)C)O)(C)C	0.00018	0.36	131751642	8	5.019	Carotenoids	o
Bidentatoside II	FDBQAHJAKLTDEC-NPTOQOKQNA-N	101129998	C[C@]12CC[C@@H](C([C@@H]1CC[C@@]3([C@@H]2CC=C4[C@]3(CC[C@@]5([C@H]4CC(CC5)(C)C)C(=O)O[C@H]6[C@@H]([C@H]([C@@H]([C@H](O6)CO)O)O)O)C)C)(C)C)O[C@@H](C(=O)O)OCC(=O)O	1.2e-05	0.12	101129998	4	7.079	Saponins	J
PE(20:5(5Z,8Z,11Z,14Z,17Z)/15:0)	PTVLNAMVOQSVMI-HGOJVSOMSA-N	52924667	CCCCCCCCCCCCCCC(=O)O[C@H](COC(=O)CCC/C=C\C/C=C\C/C=C\C/C=C\C/C=C\CC)COP(=O)(O)OCCN	2.7e-05	0.55	52924667	5	13.297	Phosphatidylethanolamines
Indoxacarb	ACPLOCGAXUGQHB-CDSIGGHENA-N	107720	COC(=O)[C@]12CC3=C(C1=NN(CO2)C(=O)N(C4=CC=C(C=C4)OC(F)(F)F)C(=O)OC)C=CC(=C3)Cl	0.0086	0.73	107720	21	3.09	Oxazines
PS(22:2(13Z,16Z)/22:4(7Z,10Z,13Z,16Z))	QIWDDYCBOBWYHF-XMHWUKAXSA-N	52925895	CCCCC/C=C\C/C=C\CCCCCCCCCCCC(=O)OC[C@H](COP(=O)(O)OC[C@@H](C(=O)O)N)OC(=O)CCCCC/C=C\C/C=C\C/C=C\C/C=C\CCCCC	5.8e-05	2.5	52925895	2	15.221	Phosphatidylserines
PC(16:0/0:0)	ASWBNKHCZGQVJV-HSZRJFAPSA-N	460602	CCCCCCCCCCCCCCCC(=O)OC[C@H](COP(=O)([O-])OCC[N+](C)(C)C)O	0.00014	0.56	460602	54	5.462	Lysophosphatidylcholines
Ginsenoside C	AGBCLJAHARWNLA-UHFFFAOYNA-N	6917976	CC(=CCC[C@@](C)([C@H]1CC[C@@]2([C@@H]1[C@@H](C[C@H]3[C@]2(CC[C@@H]4[C@@]3(CC[C@@H](C4(C)C)O[C@H]5[C@@H]([C@H]([C@@H]([C@H](O5)CO)O)O)O[C@H]6[C@@H]([C@H]([C@@H]([C@H](O6)CO)O)O)O)C)C)O)C)O[C@H]7[C@@H]([C@H]([C@@H]([C@H](O7)CO[C@H]8[C@@H]([C@H]([C@H](CO8)O)O)O)O)O)O)C	8.9e-05	2.6	6917976	50	2.916	Triterpenes
Epothilone B10	FBHLXXMDOGRQOQ-NYRRVEJINA-N	10791734	CCC1=NC(=CS1)/C=C(\C)/[C@@H]2C[C@H]3[C@H](O3)CCC[C@@H]([C@@H]([C@H](C(=O)C([C@H](CC(=O)O2)O)(C)C)C)O)C	4.8e-05	0.19	10791734	78	1.974	Macrolides	I
Heptadecanedioic acid	QCNWZROVPSVEJA-UHFFFAOYSA-N	3083765	C(CCCCCCCC(=O)O)CCCCCCCC(=O)O	0.0001	2.3	3083765	46	6.265	Saturated_Fatty Acids	L
Pregnacetal	KYGPNWVAMZIKIS-JDYIBBLLNA-N	102026325	C[C@H]([C@]1(C(=O)C[C@@H]2[C@@]1(CC[C@H]3[C@H]2CC[C@@H]4[C@@]3(CCC(C4)(OC)OC)C)C)O)O	0.00027	0.35	102026325	13	4.49	11-Hydroxycorticosteroids	x
Artapetalin A	UACVRGSPUQDTJA-AGRJPVHOSA-N	101175475	CC/C=C\C/C=C\C/C=C\CCCCCCC1=C(C(=C)OC1=O)OC	0.00015	1.8	101175475	109	8.355	Hydrocarbons, Cyclic
PS(16:0/22:1(11Z))	JJVQNBMXGKRXMX-LSNKJBRINA-N	52925309	CCCCCCCCCCCCCCCC(=O)OC[C@H](COP(=O)(O)OC[C@@H](C(=O)O)N)OC(=O)CCCCCCCCC/C=C\CCCCCCCCCC	0.00012	1.2	52925309	2	13.631	Phosphatidylserines
Ixoside	AYRQUPRKTDTPEN-LOKXSVISNA-N	44583801	C1C=C([C@@H]2[C@H]1C(=CO[C@H]2O[C@H]3[C@@H]([C@H]([C@@H]([C@H](O3)CO)O)O)O)C(=O)O)C(=O)O	0.031	0.14	44583801	39	-1.749	Iridoid Glucosides
PS(18:0/19:0)	XHYASAVUGBEIOU-GJYFHTIUNA-N	52925427	CCCCCCCCCCCCCCCCCCC(=O)O[C@H](COC(=O)CCCCCCCCCCCCCCCCC)COP(=O)(O)OC[C@@H](C(=O)O)N	0.00015	1.2	52925427	2	13.578	Phosphatidylserines
PG(P-18:0/17:2(9Z,12Z))	DTDYQXMNJDUXLI-SXUMEEKUNA-N	52927378	CCCCCCCCCCCCCCCC/C=C\OC[C@H](COP(=O)(O)OC[C@H](CO)O)OC(=O)CCCCCCC/C=C\C/C=C\CCCC	6.1e-05	1.3	52927378	12	14.211	Phosphatidylglycerols	N
Canavanine	FSBIGDSBMBYOPN-VKHMYHEASA-N	439202	C(CON=C(N)N)[C@@H](C(=O)O)N	0.00095	0.93	439202	75	-3.313	Amino Acids	a
PA(18:0/18:2(9Z,12Z))	QYYWMYCDFOLKKH-DAKWMOBOSA-N	24779559	CCCCCCCCCCCCCCCCCC(=O)OC[C@H](COP(=O)(O)O)OC(=O)CCCCCCC/C=C\C/C=C\CCCCC	2e-05	2	24779559	3	15.104	Phosphatidic Acids	K
PE(18:1(9Z)/16:0)	DVXMEPWDARXHCX-OTMQOFQLSA-N	9546802	CCCCCCCCCCCCCCCC(=O)O[C@H](COC(=O)CCCCCCC/C=C\CCCCCCCC)COP(=O)(O)OCCN	9.8e-05	1.2	9546802	5	14.036	Phosphatidylethanolamines
Pyriproxyfen	WVIITJBBQPBPEB-UHFFFAOYSA-N	91753	CC(COC1=CC=C(C=C1)OC2=CC=CC=C2)OC3=CC=CC=N3	5.6e-06	0.47	91753	21	2.799	Pyridines
DG(18:1(9Z)/20:5(5Z,8Z,11Z,14Z,17Z)/0:0)	JLJZWBKQVKCOJP-GZAZVFSZSA-N	9543797	CCCCCCCC/C=C\CCCCCCCC(=O)OC[C@H](CO)OC(=O)CCC/C=C\C/C=C\C/C=C\C/C=C\C/C=C\CC	1.5e-05	2	9543797	45	15.974	Glycerides
(22E,24E,24bE)-1alpha,25-dihydroxy-26,27-dimethyl-22,23,24,24a,24b,24c-hexadehydro-24a,24b,24c-trihomovitamin D3 / (22E,24E,24bE)-1alpha,25-dihydroxy-26,27-dimethyl-22,23,24,24a,24b,24c-hexadehydro-24a,24b,24c-trihomocholecalciferol	IMIQPAWIJCTKKS-ZRCBEPLUNA-N	9547616	CCC(CC)(/C=C/C=C/C=C/[C@H](C)[C@H]1CC[C@@H]\2[C@@]1(CCC/C2=C\C=C/3\C[C@H](C[C@@H](C3=C)O)O)C)O	0.0017	1.2	9547616	107	7.719	Dihydroxycholecalciferols	G
Makaluvamine K	MFJASCFAUMWBMV-UHFFFAOYSA-N	464127	CN1C=C2CCN=C3C2=C1C(=O)C(=C3)NCCC4=CC=C(C=C4)O	0.00035	1.8	464127	19	1.417	Pyridines
Ganoderal A	RHNFCIPJKSUUES-AWQFTUOYNA-N	13934282	C[C@H](CC/C=C(\C)/C=O)[C@H]1CC[C@@]2([C@@]1(CC=C3C2=CC[C@@H]4[C@@]3(CCC(=O)C4(C)C)C)C)C	0.0061	1.2	13934282	32	8.445	Cholestadienols
2-Hydroxy-22-methyltetracosanoic acid	IJYLBYZUFMZUOS-UHFFFAOYNA-N	23427392	CCC(C)CCCCCCCCCCCCCCCCCCCC(C(=O)O)O	0.00015	2.7	23427392	16	11.655	OH-FA_25_0_1	j
(22E, 24x)-Ergosta-4,6,8,22-tetraen-3-one	PVOXMLZUXQNIHC-BQYQJAHWNA-N	12943211	CC(C)C(C)/C=C/C(C)C1CCC2C1(CCC3=C2C=CC4=CC(=O)CCC34C)C	0.00011	2.6	12943211	32	9.78	Cholestadienols
PE(P-16:0/20:5(5Z,8Z,11Z,14Z,17Z))	RLLOITCRNQRGJD-DFAKUSJGSA-N	52925061	CCCCCCCCCCCCCC/C=C\OC[C@H](COP(=O)(O)OCCN)OC(=O)CCC/C=C\C/C=C\C/C=C\C/C=C\C/C=C\CC	2.8e-09	0.042	52925061	24	14.404	Phosphatidylethanolamines
PS(P-16:0/13:0)	OXGZETUPCROIDN-ZAZBUNNBNA-N	52926184	CCCCCCCCCCCCCC/C=C\OC[C@H](COP(=O)(O)OC[C@@H](C(=O)O)N)OC(=O)CCCCCCCCCCCC	4.7e-10	0.038	52926184	2	9.564	Phosphatidylserines
Fucoxanthinol	NZEPSBGUXWWWSI-KZOZQWPVNA-N	11273547	C/C(=C\C=C\C=C(/C)\C=C\C=C(/C)\C(=O)C[C@]12[C@](O1)(C[C@H](CC2(C)C)O)C)/C=C/C=C(\C)/C=C=C3[C@](C[C@H](CC3(C)C)O)(C)O	5e-10	0.039	11273547	8	9.134	Carotenoids	o
IC202A	BVRULQCEMCYBAM-UHFFFAOYSA-N	70678744	CCCC/C=[N+](/CCCCNC(=O)CCC(=O)N(CCCCCNC(=O)CCC(=O)N(CCCCCN)O)O)\[O-]	5e-10	0.037	70678744	11	-0.515	Hydroxamic Acids	e
Zucchini factor B	VKNUHXUEPNYSDN-UHFFFAOYNA-N	131751591	CC1(C(CCC2(C1CC=C3C2=CCC4(C3(CCC5(C4CC(CC5)(C)COC(=O)C6=CC=CC=C6)C)C)C)C)OC(=O)C7=CC=C(C=C7)N)C	0.0001	2.4	131751591	79	11.309		v
Didemniserinolipid B	FZIDSLBFXPDAQT-AHFSABOBNA-N	129696925	CCOC(=O)/C=C/CCCC[C@@H]1[C@H]2C(CCC(O1)(O2)CCCCCCCCCCCCCCCOCC(COS(=O)(=O)[O-])N)O.[Na+]	9.1e-05	2.3	129696925	41	6.268
O-(17-carboxyheptadecanoyl)carnitine	ULCCGBCYWCYNIC-UHFFFAOYNA-N	71464574	C[N+](C)(C)CC(CC(=O)[O-])OC(=O)CCCCCCCCCCCCCCCCC(=O)O	7.4e-09	0.039	71464574	18	5.913	Carnitine	b
(10Z,14E,16E)-10,14,16-Octadecatrien-12-ynoic acid	KDVOULUCGQGVQH-IUDSIRJBSA-N	10731060	C/C=C/C=C/C#C/C=C\CCCCCCCCC(=O)O	9.4e-07	3.1	10731060	95	6.931	UnSaturated FA
PS(O-20:0/17:1(9Z))	ATQLZAZHNZQPGD-HYFZSIHSNA-N	52926138	CCCCCCCCCCCCCCCCCCCCOC[C@H](COP(=O)(O)OC[C@@H](C(=O)O)N)OC(=O)CCCCCCC/C=C\CCCCCCC	0.00021	2.3	52926138	2	13.369	Phosphatidylserines
Askendoside C	CQGUDVRRZKLXFR-YHROOGGHNA-N	14392634	C[C@H](CC[C@H](C(C)(C)O)O)[C@H]1[C@H](C[C@@]2([C@@]1(CC[C@]34[C@H]2C[C@@H]([C@@H]5[C@]3(C4)CC[C@@H](C5(C)C)O[C@H]6[C@@H]([C@H]([C@@H](CO6)O)O)O[C@H]7[C@@H]([C@H]([C@H](CO7)O)O)O)O)C)C)O	9.3e-05	0.19	14392634	25	3.243	Triterpenes
Gagunin G	BNFUNWYCZCZCDU-AENWMRRKNA-N	10918913	CCCC(=O)O[C@H]1C[C@@]2([C@H](C=C([C@@H]([C@@H]([C@H]2OC(=O)CCC)O)OC(=O)C)C)[C@@H]3[C@]1(C[C@@H]([C@@H]3C(C)C)OC(=O)C)C)C	9.7e-05	2	10918913	49	5.303	Taxoids
7,8-Dehydroastaxanthianthin	BZQRJBLJDFPOBX-FOERLQQGNA-N	131752072	CC1=C(C(CC(C1=O)O)(C)C)/C=C/C(=C/C=C/C(=C\C=C\C=C(/C)\C=C\C=C(\C)/C#CC2=C(C(=O)C(CC2(C)C)O)C)/C)/C	0.00012	2	131752072	48	9.662	Carotenoids
Nakinadine F	XMZHAKHAERJJSJ-DYMHTNKONA-N	101842597	C1=CC=C(C=C1)[C@@H]([C@@H](CCCCCCCCC/C=C/CCC2=CN=CC=C2)NCCCCCCCCCC/C=C\CCC3=CN=CC=C3)C(=O)O	7.1e-05	0.92	101842597	105	11.995	Amino Acids, Aromatic
PA(O-16:0/20:3(8Z,11Z,14Z))	XAZWQDFVISZXQF-CKXISFNLNA-N	52929639	CCCCCCCCCCCCCCCCOC[C@H](COP(=O)(O)O)OC(=O)CCCCCC/C=C\C/C=C\C/C=C\CCCCC	0.0001	2.2	52929639	3	15.084	Phosphatidic Acids	K
Halstoctacosanolide A	GQHNSYURZJAIPC-IFGCVEQJNA-N	10259958	CCC(C(C)C(CC(C(/C=C(\C)/CC(C)C1CC(C(/C=C/C=C/CC(C(=O)CC2CCC(C(O2)(C/C=C(\C=C(\C(C(=O)/C=C(/C(=O)O1)\C)O)/C)/C)O)C)C)C)O)O)O)O)O	0.00033	0.79	10259958	33	3.758	Macrolides
Bistellettazine A	MGSPLLAFQGMMFJ-AFCHPKOXNA-N	102024644	CC1=C[C@@H]([C@@](CC1)(C)/C=C/C=C(\C)/C=C/C(=O)NCC2CCN3C2CCC3)/C=C(\C)/C=C/C=C(\C)/C(=O)NCC4CCN5C4CCC5	6.3e-05	2.3	102024644	116	7.669	Pyrrolizidine Alkaloids
PS(13:0/22:1(11Z))	RSPCCVKPCKASFS-LQHYVTKYNA-N	52925199	CCCCCCCCCCCCC(=O)OC[C@H](COP(=O)(O)OC[C@@H](C(=O)O)N)OC(=O)CCCCCCCCC/C=C\CCCCCCCCCC	6.1e-05	0.7	52925199	2	11.924	Phosphatidylserines
Cyclopassifloside VII	MOYBUGGNPKXCHY-UHFFFAOYNA-N	101063338	CC(C)C(CC[C@@](C)([C@H]1[C@H](C[C@@]2([C@@]1(CC[C@]34[C@H]2CC[C@@H]5[C@]3(C4)[C@H](C[C@@H]([C@@]5(C)C(=O)O[C@H]6[C@@H]([C@H]([C@@H]([C@H](O6)CO)O)O)O)O)O)C)C)O)O)(CO)O	4.8e-05	0.62	101063338	83	2.8	Glycosides
Latoxanthin	IHFACKVTKFGBBA-YFUVOBOANA-N	102150983	C/C(=C\C=C\C=C(/C)\C=C\C=C(/C)\C=C\[C@]12[C@](O1)(C[C@H](CC2(C)C)O)C)/C=C/C=C(\C)/C=C/[C@@]3([C@](C[C@H](CC3(C)C)O)(C)O)O	0.00021	4.7	102150983	8	8.375	Carotenoids	o
PC(P-16:0/14:1(9Z))	RMEZSZVJIYBBIJ-MWXRYAQWSA-N	52923876	CCCCCCCCCCCCCC/C=C\OC[C@H](COP(=O)([O-])OCC[N+](C)(C)C)OC(=O)CCCCCCC/C=C\CCCC	8.7e-07	0.74	52923876	24	12.736	Phosphatidylcholines
PI(22:2(13Z,16Z)/18:0)	AGRIIGVRFSIIFE-SJURNENZNA-N	52928189	CCCCCCCCCCCCCCCCCC(=O)O[C@H](COC(=O)CCCCCCCCCCC/C=C\C/C=C\CCCCC)COP(=O)(O)OC1C([C@@H](C(C(C1O)O)O)O)O	0.00012	3.7	52928189	23	16.082	Phosphatidylinositols
Stearidonic acid	JIWBIWFOSCKQMA-LTKCOYKYSA-N	5312508	CC/C=C\C/C=C\C/C=C\C/C=C\CCCCC(=O)O	0.016	0.85	5312508	95	7.211	UnSaturated FA
PA(19:0/22:4(7Z,10Z,13Z,16Z))	HGHZFVJKBVRZOK-HCCSWTPFNA-N	52929069	CCCCCCCCCCCCCCCCCCC(=O)OC[C@H](COP(=O)(O)O)OC(=O)CCCCC/C=C\C/C=C\C/C=C\C/C=C\CCCCC	5.5e-05	3	52929069	3	17.295	Phosphatidic Acids	K
PE-Cer(d14:2(4E,6E)/24:1(15Z))	QFUFVSYJHLNTNO-XJQRGJTPNA-N	70699020	CCCCCCCC/C=C\CCCCCCCCCCCCCC(=O)N[C@@H](COP(=O)(O)OCCN)[C@@H](/C=C/C=C/CCCCCCC)O	8.2e-05	3.6	70699020	76	13.774		O
Ginsenoside Rg5	NJUXRKMKOFXMRX-JJFYIABZNA-N	11550001	CC(=CC/C=C(\C)/[C@H]1CC[C@@]2([C@@H]1[C@@H](C[C@H]3[C@]2(CC[C@@H]4[C@@]3(CC[C@@H](C4(C)C)O[C@H]5[C@@H]([C@H]([C@@H]([C@H](O5)CO)O)O)O[C@H]6[C@@H]([C@H]([C@@H]([C@H](O6)CO)O)O)O)C)C)O)C)C	4.9e-05	2.9	11550001	50	6.506	Triterpenes
Cyclocanthoside A	WWWSFRYQXBVZOD-FXPVXXKYNA-N	21633192	C[C@H](CC[C@@H](C(C)(C)O)O)[C@H]1[C@H](C[C@@]2([C@@]1(CC[C@]34[C@H]2C[C@@H]([C@@H]5[C@]3(C4)CC[C@@H](C5(C)C)O[C@H]6[C@@H]([C@H]([C@@H](CO6)O)O)O)O)C)C)O	8.3e-05	3.8	21633192	25	4.537	Spirostans
PA(18:4(6Z,9Z,12Z,15Z)/18:3(6Z,9Z,12Z))	ALOGJFKHMXDEGC-LNKMRZDISA-N	52929030	CCCCC/C=C\C/C=C\C/C=C\CCCCC(=O)O[C@H](COC(=O)CCCC/C=C\C/C=C\C/C=C\C/C=C\CC)COP(=O)(O)O	4.8e-05	3	52929030	85	13.28	Phosphatidic Acids
Astaxanthin	MQZIGYBFDRPAKN-IDLFNPRFNA-N	5281224	CC1=C(C(C[C@@H](C1=O)O)(C)C)/C=C/C(=C/C=C/C(=C/C=C/C=C(/C=C/C=C(/C=C/C2=C(C(=O)[C@H](CC2(C)C)O)C)\C)\C)/C)/C	4.6e-05	3.1	5281224	48	9.696	Carotenoids
Madhucic acid	JKDKWICYSPHZGM-MNGPTGSQNA-N	12097013	CCCCCCCC(=O)O[C@H]1CC[C@]2([C@H](C1(C)C)CC[C@@]3([C@@H]2C(=O)C=C4[C@]3(CC[C@@]5([C@H]4CC(CC5)(C)C)C(=O)O)C)C)C	9.2e-05	0.85	12097013	100	10.583	Triterpenes	P
Rubixanthin	ABTRFGSPYXCGMR-KZLGKGLPNA-N	5281252	CC1=C(C(C[C@@H](C1)O)(C)C)/C=C/C(=C/C=C/C(=C/C=C/C=C(\C)/C=C/C=C(\C)/C=C/C=C(\C)/CCC=C(C)C)/C)/C	8e-05	3.6	5281252	48	12.575	Carotenoids
PS(O-18:0/19:1(9Z))	GNVQMWODSYHZEQ-CKTVKIBGNA-N	52926122	CCCCCCCCCCCCCCCCCCOC[C@H](COP(=O)(O)OC[C@@H](C(=O)O)N)OC(=O)CCCCCCC/C=C\CCCCCCCCC	7.4e-09	0.74	52926122	2	13.369	Phosphatidylserines
Plakinamine H	VKUXLFCVHPEFNU-SGSUXEKXNA-N	101194562	CC1=C(CCNC1)/C=C/[C@H](C)[C@H]2CC[C@@H]3[C@@]2(CC[C@H]4C3=CCC5[C@@]4(CC[C@@H](C5=O)N(C)C)C)C	0.0001	3.4	101194562	116	6.609
Mycolactone	WKTLNJXZVDLRTJ-QRRXZRELSA-N	5282079	C[C@H]1C/C(=C/C[C@@H](OC(=O)CCC[C@@H]1OC(=O)/C=C/C(=C/C(=C/C=C/C(=C/[C@@H]([C@H](C[C@H](C)O)O)O)/C)/C)/C)[C@@H](C)C/C(=C/[C@@H](C)[C@@H](C[C@@H](C)O)O)/C)/C	6.7e-05	3.2	5282079	33	6.738	Macrolides
(E,E)-4,4''-Bi(N-4-hydroxycinnamoylserotonin)	OIUNULHHOJRJBI-IAGONARPSA-N	11764751	C1=CC(=CC=C1/C=C/C(=O)NCCC2=CNC3=C2C(=C(C=C3)O)C4=C(C=CC5=C4C(=CN5)CCNC(=O)/C=C/C6=CC=C(C=C6)O)O)O	0.00024	3	11764751	35	2.7	Serotonin
chlorophyllide a	AXNGBNDQHOVSCG-UHFFFAOYNA-L	439664	CCC1=C(C2=NC1=CC3=C(C4=C([N-]3)C(=C5[C@H]([C@@H](C(=N5)C=C6C(=C(C(=C2)[N-]6)C=C)C)C)CCC(=O)O)[C@H](C4=O)C(=O)OC)C)C.[Mg+2]	0.00024	2.8	439664	65	1.505	Chlorophyllides
Nb-Tricosanoyltryptamine	XJUYJAIYKWBPLY-UHFFFAOYSA-N	10625101	CCCCCCCCCCCCCCCCCCCCCCC(=O)NCCC1=CNC2=CC=CC=C21	0.0027	2.7	10625101	84	12.567	Indoles	m
PS(O-20:0/19:1(9Z))	FTTXHVPJDSNJJK-HGAFSJOLNA-N	52926147	CCCCCCCCCCCCCCCCCCCCOC[C@H](COP(=O)(O)OC[C@@H](C(=O)O)N)OC(=O)CCCCCCC/C=C\CCCCCCCCC	2e-05	0.67	52926147	2	14.507	Phosphatidylserines
Pyrinodemin C	FRALZFIIIKECNY-WAJAPOGWNA-N	10007959	C1C[C@H]2[C@@H](C1)N(O[C@H]2CCCCCCCCC3=CN=CC=C3)CCC/C=C\CCCCCCCCC4=CN=CC=C4	9.4e-06	0.69	10007959	105	9.132	Pyridines
Alpha-Carotene	ANVAOWXLWRTKGA-JLTXGRSLNA-N	4369188	CC1=C(C(CCC1)(C)C)/C=C/C(=C/C=C/C(=C/C=C/C=C(\C)/C=C/C=C(\C)/C=C/C2C(=CCCC2(C)C)C)/C)/C	0.00017	2.4	4369188	40	15.187	Carotenoids	A
Methyl pheophorbide a	IWKYEJKHXKRZIJ-PIEZJCHHNA-N	135407639	CCC1=C(C2=NC1=CC3=C(C4=C([C@@H](C(=C5[C@H]([C@@H](C(=CC6=NC(=C2)C(=C6C)C=C)N5)C)CCC(=O)OC)C4=N3)C(=O)OC)O)C)C	0.0019	2.8	135407639	65	2.923	Chlorophyllides
Durissimol B	WAHSICHAYKKWOI-NHQGMKOONA-N	10368409	C#CC(/C=C/CCCCCCCCCCCCC#CCCCCCCCCCCC#CC#CCO)O	0.029	0.1	10368409	63	12.559	Saturated FA	D
PA(19:0/20:0)	DEQWDWORTDIDNV-RRHRGVEJSA-N	52929059	CCCCCCCCCCCCCCCCCCCC(=O)O[C@H](COC(=O)CCCCCCCCCCCCCCCCCC)COP(=O)(O)O	0.0054	0.0073	52929059	54	17.654	Phosphatidic Acids
Triricinolein	ZEMPKEQAKRGZGQ-YAFIDQONNA-N	11764524	CCCCCC[C@@H](O)C/C=C\CCCCCCCC(=O)OCC(OC(=O)CCCCCCC/C=C\C[C@H](O)CCCCCC)COC(=O)CCCCCCC/C=C\C[C@H](O)CCCCCC	0.0078	0.073	11764524	45	18.901	Glycerides
Glisoprenin D	NWNDDBQOCUDCDV-QYOQUFJENA-N	10628793	C/C(=C\CC/C(=C/CC/C(=C/CC/C(=C/CO)/C)/C)/C)/CCCC(C)(CCCC(C)(CCCC(C)(CCCC(C)(CCC(C(C)(C)O)O)O)O)O)O	0.049	0.26	10628793	68	9.128	OH-FA_45_3_5	z

## Sheet: Leaves_131DAT
Compound.Name	InChiKeys	Pubchem.ID	SMILES	pvalue	foldchange	CID	ClusterNumber	xlogp	ClusterLabel	TreeLabels
Spermidine	ATHGHQPFGPMSJY-UHFFFAOYSA-N	1102	C(CCNCCCN)CN	0.0041	7.4	1102	34	-0.654	Putrescine
Heptanenitrile	SDAXRHHPNYTELL-UHFFFAOYSA-N	12372	CCCCCCC#N	0.0049	7.1	12372	120	2.56
Zwiebelane B	MDLUYFYDCNUJHX-UHFFFAOYNA-N	15811989	C[C@@H]1[C@H]([C@H]2S[C@@H]1S2=O)C	0.0062	5.2	15811989	75	0.045	Azabicyclo Compounds
Arginine	ODKSFYDXXFIFQN-BYPYZUCNSA-N	6322	C(C[C@@H](C(=O)O)N)CN=C(N)N	0.0033	0.92	6322	69	-3.585	Amino Acids	a
Tetrahydrofolic acid	MSTNYGQPCMXVAQ-PXYINDEMSA-N	135444742	C1C(NC2=C(N1)N=C(NC2=O)N)CNC3=CC=C(C=C3)C(=O)N[C@@H](CCC(=O)O)C(=O)O	1.2e-07	0.48	135444742	48	-3.822	Tetrahydrofolates
L-trans-5-Hydroxy-2-piperidinecarboxylic acid	RKEYKDXXZCICFZ-UHFFFAOYNA-N	151730	C1CC(NCC1O)C(=O)O	7.8e-05	1.3	151730	70	-0.428	Pipecolic Acids
Allysine	RKEYKDXXZCICFZ-UHFFFAOYNA-N	207	C(CC=O)CC(C(=O)O)N	1e-08	2	207	13	-2.577
L-Valine	KZSNJWFQEVHDMF-SGAVLPGINA-N	6287	CC(C)[C@@H](C(=O)O)N	5.1e-06	0.96	6287	13	-2.169	Amino Acids
2-Amino-3-carboxymuconic acid semialdehyde	KACPVQQHDVBVFC-OIFXTYEKSA-N	5280673	C(=C\C(=C(/C(=O)O)\N)\C(=O)O)\C=O	0.0039	1.2	5280673	118	-3.188
2-Thiophenecarboxaldehyde	CNUDBTRUORMMPA-UHFFFAOYSA-N	7364	C1=CSC(=C1)C=O	0.002	0.82	7364	21	0.78	Thiophenes	b
proline	ONIBWKKTOPOVIA-BYPYZUCNSA-N	614	C1CC(NC1)C(=O)O	0.035	1.1	614	69	-0.185	Imino Acids	a
Melibiose	DLRVVLDZNNYCBX-ABXHMFFYSA-N	440658	C([C@@H]1[C@@H]([C@@H]([C@H]([C@H](O1)OC[C@@H]2[C@H]([C@@H]([C@H](C(O2)O)O)O)O)O)O)O)O	4e-06	0.67	440658	9	-3.234	Disaccharides	c
2'-Deoxymugineic acid	CUZKLRTTYZOCSD-UHFFFAOYNA-N	189811	C1CN([C@@H]1C(=O)O)CC[C@@H](C(=O)O)NCC[C@@H](C(=O)O)O	0.0053	1.2	189811	71	-1.713		d
33'4-Tri-O-methylflavellagic acid	BLICLJSLKJVPKA-UHFFFAOYSA-N	14412544	COC1=C(C=C2C3=C1OC(=O)C4=C3C(=C(C(=C4O)OC)OC)OC2=O)O	0.011	1.2	14412544	29	1.39	Coumarins
Apigenin 7-sulfate	UQUHXFINOFUDCC-UHFFFAOYSA-N	14016776	C1=CC(=CC=C1C2=CC(=O)C3=C(C=C(C=C3O2)OS(=O)(=O)O)O)O	0.0011	0.75	14016776	16	-0.708	Flavonoids	e
Stachyose	UQZIYBXSHAGNOE-CYDMKDQUNA-N	439531	C([C@@H]1[C@@H]([C@@H]([C@H]([C@H](O1)OC[C@@H]2[C@@H]([C@@H]([C@H]([C@H](O2)OC[C@@H]3[C@H]([C@@H]([C@H]([C@H](O3)O[C@]4([C@H]([C@@H]([C@H](O4)CO)O)O)CO)O)O)O)O)O)O)O)O)O)O	0.0086	4.6	439531	9	-6.351	Oligosaccharides	c
Salvianolic acid K	AZOCLKLJIKZOLF-KTLDLXQWNA-N	10482829	C1=CC(=C(C=C1C[C@H](C(=O)O)OC(=O)/C=C/C2=CC(=C(C=C2)O[C@H]([C@@H](C3=CC(=C(C=C3)O)O)O)C(=O)O)O)O)O	0.0026	2.2	10482829	62	1.075	Cinnamates
oxytetracycline	IWVCMVBTMGNXQD-PXOLEDIWSA-N	54675779	C[C@@]1([C@H]2[C@@H]([C@H]3[C@@H](C(=O)C(=C([C@]3(C(=O)C2=C(C4=C1C=CC=C4O)O)O)O)C(=O)N)N(C)C)O)O	0.046	2	54675779	66	-1.779	Tetracyclines	f
Viscutin 1	TXPZFODNQVHXLF-SLBHPWMWNA-N	44257191	C1CC2=C(C=C(C=C2O[C@H]3C([C@H]([C@@H](CO3)O)O)OC(=O)C4=CC=C(C=C4)O)O)O[C@@H]1C5=CC(=C(C=C5)O)O	0.013	5	44257191	89	1.478	Glucosides	g
MMV687248	PWAACAMQKVIVPZ-UHFFFAOYSA-N	70687214	C1=CC(=CC=C1OC2=CN=CC(=C2)C3=CC4=C(C=C3)N=C(N4)N)F	0.0081	6.4	70687214	39	1.19		h
L-Tyrosine	OUYCCCASQSFEME-QMMMGPOBSA-N	6057	C1=CC(=CC=C1C[C@@H](C(=O)O)N)O	0.0021	4	6057	88	-2.711	Amino Acids, Aromatic	i
(+)-Chebulic acid	COZMWVAACFYLBI-UHFFFAOYNA-N	12302892	C1=C2C(=C(C(=C1O)O)O)C(C(OC2=O)C(=O)O)C(CC(=O)O)C(=O)O	0.00089	2	12302892	62	-0.609	Benzopyrans
4-Hydroxymandelonitrile	FFEARJCKVFRZRR-BYPYZUCNSA-N	166768	C1=CC(=CC=C1C(C#N)O)O	0.014	1.2	166768	15	-0.763	Phenols
Pantothenic acid	GHOKWGTUZJEAQD-UHFFFAOYSA-N	6613	CC(C)(CO)[C@H](C(=O)NCCC(=O)O)O	0.0022	7.6	6613	71	-1.343	beta-Alanine	d
NAD	LFERELMXERXKKQ-KMXXXSRASA-N	5892	C1=CC(=C[N+](=C1)[C@H]2[C@@H]([C@@H]([C@H](O2)COP(=O)([O-])OP(=O)(O)OC[C@@H]3[C@H]([C@H]([C@@H](O3)N4C=NC5=C(N=CN=C54)N)O)O)O)O)C(=O)N	0.034	1.8	5892	97	-6.261	Adenine Nucleotides
Coumarin	ZYGHJZDHTFUPRJ-UHFFFAOYSA-N	323	C1=CC=C2C(=C1)C=CC(=O)O2	0.00017	0.62	323	64	1.022	Coumarins
11-Hydroxy-9-tridecenoic acid	NSVPCFNUUARRKL-CSKARUKUNA-N	5318367	CCC(/C=C/CCCCCCCC(=O)O)O	0.0063	3	5318367	87	3.528	OH-FA_13_1_1	j
Garciduol C	HPYVBXILLKDBSO-UHFFFAOYSA-N	10672572	COC1=C(C(=C(C(=C1)O)C(=O)C2=CC=CC=C2)O)C3=CC(=C(C4=C3OC5=C(C4=O)C=CC=C5O)O)O	0.0023	3	10672572	29	3.618	Isoflavones
Pyridoxal 5'-phosphate	NGVDGCNFYWLIFO-UHFFFAOYSA-N	1051	CC1=NC=C(C(=C1O)C=O)COP(=O)(O)O	0.00018	4	1051	43	-1.983	Pyridoxal
246-Octatriyn-1-ol	CDDRQTICNABTAT-UHFFFAOYSA-N	11679812	CC#CC#CC#CCO	0.0062	5.3	11679812	120	1.688
13-Diphenethylurea	VMQLWVGHPWFHEI-UHFFFAOYSA-N	95244	C1=CC=C(C=C1)CCNC(=O)NCCC2=CC=CC=C2	0.0042	7.3	95244	21	2.694		b
pseudaminic acid	ZJOSXOOPEBJBMC-LJRWBPDUSA-N	101137651	C[C@@H]([C@@H]([C@H]1[C@H]([C@H](C[C@](O1)(C(=O)O)O)O)N)N)O	0.048	1.4	101137651	44	-3.165	Sugar Acids
34-Dihydroxy-L-phenylalanine	WTDRDQBEARUVNC-LURJTMIESA-N	6047	C1=CC(=C(C=C1C[C@@H](C(=O)O)N)O)O	0.0015	3	6047	88	-2.363	Amino Acids, Aromatic	i
Cycloserine	DYDCUQKUCUHJBH-RUOZJJLTNA-N	6234	C1[C@H](C(=O)NO1)N	0.005	7.8	6234	13	-0.915	Oxazolidinones
Methyl 346-tri-O-galloyl-beta-D-glucopyranoside	DXMITXYQZDSXOV-UHFFFAOYNA-N	13270027	COC1C(C(C(C(O1)COC(=O)C2=CC(=C(C(=C2)O)O)O)OC(=O)C3=CC(=C(C(=C3)O)O)O)OC(=O)C4=CC(=C(C(=C4)O)O)O)O	0.008	7.7	13270027	89	2.458	Glucosides	g
Guanine	DRAVOWXCEBXPTN-UHFFFAOYSA-N	135398634	C1=NC2=C(N1)C(=O)NC(=N2)N	0.0082	3	135398634	105	-0.763	Hypoxanthines
Sorbitan laurate	LWZFANDGMFTDAV-UHFFFAOYNA-N	14926	CCCCCCCCCCCC(=O)OCC([C@@H]1[C@H]([C@@H](CO1)O)O)O	0.0062	8.4	14926	59	4.094	EpETrE
Adenosine	OIRDTQYFTABQOQ-KQYNXXCUSA-N	60961	C1=NC(=C2C(=N1)N(C=N2)[C@H]3[C@@H]([C@@H]([C@H](O3)CO)O)O)N	1.9e-05	1.3	60961	37	-2.367	Purine Nucleosides
Leucyl-Arginine	SENJXOPIZNYLHU-UHFFFAOYNA-N	152914	CC(C)C[C@@H](C(=O)N[C@@H](CCCN=C(N)N)C(=O)O)N	0.0047	1.1	152914	69	-2.452	Oligopeptides	a
GUANOSINE	NYHBQMYGNKIUIF-SBTUYZBDNA-N	135398635	C1=NC2=C(N1[C@H]3[C@@H]([C@@H]([C@H](O3)CO)O)O)N=C(NC2=O)N	0.0041	8.7	135398635	37	-2.272	Purine Nucleosides
9-Hydroxy-10-epi-ryanodine	REYPEWVSBJSDJC-OFOHABJSNA-N	100991758	CC(C)[C@]1([C@H]([C@]2([C@]3(C[C@]4([C@@]1([C@@]2([C@@]5([C@@]3(CC[C@@]([C@@H]5O)(C)O)O)O4)O)C)O)C)O)OC(=O)C6=CC=CN6)O	0.00056	1.3	100991758	36	-0.32	Diterpenes	k
4-Hydroxyquinoline	FGYQUFZANKOISC-UHFFFAOYNA-N	69141	C1=CC=C2C(=C1)C(=O)C=CN2	0.005	7	69141	58	1.037	Indoles	l
Indole-3-acetamide	ZOAMBXDOGPRZLP-UHFFFAOYSA-N	397	C1=CC=C2C(=C1)C(=CN2)CC(=O)N	0.0049	7.5	397	83	0.077	Indoles	m
D-(+)-Glucosamine	MSWZFWKMSRAUBD-IVMDWMLBSA-N	439213	C([C@@H]1[C@H]([C@@H]([C@H](C(O1)O)N)O)O)O	4.3e-05	1.3	439213	44	-1.764	Hexosamines
Indole-3-carbinol	APEJMQOBVMLION-UHFFFAOYSA-N	3712	C1=CC=C2C(=C1)C(=CN2)CO	0.0046	7.4	3712	31	0.996	Indoles	n
56-Epoxy-56-dihydro-10'-apo-by-carotene-310'-diol	GMQZSQMIENYQEB-AFMCRXATNA-N	131752517	C/C(=C/C=C/C=C(\C)/C=C/C=C(/C)\C=C\C12C(CC(CC1(O2)C)O)(C)C)/C=C\CO	0.0034	13	131752517	17	5.747	Carotenoids
Rehmaglutin A	QMQZZRSFTSGWJA-GRLMZUJMNA-N	5320903	C1CO[C@H]2[C@H]3[C@@H]1[C@@H]([C@H]([C@]3(CO2)O)O)O	0.00049	1.2	5320903	68	-0.968	Triterpenes	o
5-Thymidylic acid	GYOZYWVXFNDGLU-XLPZGREQSA-N	9700	CC1=CN(C(=O)NC1=O)[C@H]2C[C@@H]([C@H](O2)COP(=O)(O)O)O	0.0056	4.9	9700	112	-2.993	Thymine Nucleotides	p
NCGC00168877-02 C15H20O8 3-(4-Hydroxyphenyl)-3-oxopropyl beta-D-glucopyranoside	GEVWHIDSUOMVRI-YAWGZTSLNA-N	10471692	C1=CC(=CC=C1C(=O)CCO[C@H]2[C@@H]([C@H]([C@@H]([C@H](O2)CO)O)O)O)O	1.8e-05	1.5	10471692	40	-1.457	Iridoids
INDOLE-3-PYRUVIC ACID	RSTKLPZEZYGQPY-UHFFFAOYSA-M	803	C1=CC=C2C(=C1)C(=CN2)CC(=O)C(=O)O	2.7e-05	1.8	803	53	0.459	Indoles	q
1-benzofuran-4-ol	CFBCZETZIPZOGW-UHFFFAOYSA-N	11607921	C1=CC(=C2C=COC2=C1)O	1.7e-05	1.6	11607921	35	1.021	Isoflavones
L-kynurenine	YGPSJZOEDVAXAB-QMMMGPOBSA-N	161166	C1=CC=C(C(=C1)C(=O)C[C@@H](C(=O)O)N)N	0.0044	8.2	161166	114	-2.868	Amino Acids	r
Phenylalanine	COLNVLDHVKWLRT-QMMMGPOBSA-N	6140	C1=CC=C(C=C1)C[C@@H](C(=O)O)N	0.0039	6.3	6140	92	-1.575	Amino Acids, Aromatic
Indoline	KRNSYSYRLQDHDK-UHFFFAOYSA-N	10328	C1CNC2=CC=CC=C21	0.0039	5.7	10328	114	0.799	Indoles	r
NCGC00385684-01 C12H16O8 4H-Pyran-4-one 3-(beta-D-glucopyranosyloxy)-2-methyl-	WXTPOHDTGNYFSB-UHFFFAOYNA-N	5316639	CC1=C(C(=O)C=CO1)O[C@H]2[C@@H]([C@H]([C@@H]([C@H](O2)CO)O)O)O	1.4e-06	1.4	5316639	1	-0.828	Pyrones	s
Bis-N-butyl phthalate	GTQXJGMYZPFFKR-UHFFFAOYNA-N	78385899	CCOC(=O)NCC1=CC=C(C=C1)OC2C(C(C(C(O2)C)OC(=O)C)OC(=O)C)OC(=O)C	6.6e-06	1.7	78385899	111	1.441		t
Trans-Zeatin-9-glucoside	VYRAJOITMBSQSE-GIHYWFGSSA-N	9842892	C/C(=C\CNC1=C2C(=NC=N1)N(C=N2)[C@H]3[C@@H]([C@H]([C@@H]([C@H](O3)CO)O)O)O)/CO	0.0013	1.1	9842892	37	-2.405	Purine Nucleosides
Phaeophorbide	ATGWBOWMZVPOGA-DVKKQCGRNA-N	253193	CCC1=C(C2=NC1=CC3=C(C4=C([C@@H](C(=C5[C@H]([C@@H](C(=CC6=NC(=C2)C(=C6C)C=C)N5)C)CCC(=O)O)C4=N3)C(=O)OC)O)C)C	0.0043	6.3	253193	22	2.602	Chlorophyllides
Scupontin B	LSEZGUSNRPXEKV-CKKZYBLGNA-N	10507887	C[C@@H]1C[C@@H]([C@@]2([C@@H]([C@@]1(C)[C@@H]3C[C@H]4C=CO[C@H]4O3)CCC[C@]25CO5)COC(=O)C[C@H](C)OC(=O)C[C@H](C)OC(=O)C)OC(=O)C	0.0054	13	10507887	6	4.32	Triterpenes	u
4-Hydroxybenzoylcholine	BAPAICNRGIBFJT-UHFFFAOYSA-O	151252	C[N+](C)(C)CCOC(=O)C1=CC=C(C=C1)O	0.007	7.9	151252	101	0.251		v
Capillin	RAZOKRUZEQERLH-UHFFFAOYSA-N	10321	CC#CC#CC(=O)C1=CC=CC=C1	0.028	35000	10321	21	2.738	Diynes	b
Moluccensin E	UBIMVMXJRZDHMZ-UHFFFAOYNA-N	102418510	CC[C@H](C)C(=O)O[C@]12CC3([C@@H]([C@]1([C@H]4CC[C@]5([C@@H]([C@@]4(C(=O)[C@@]2([C@@H]3OC(=O)C(C)C)O)C)CC(=O)O[C@@H]5C6=COC=C6)C)C)CC(=O)OC)C	0.013	1.5	102418510	12	4.048	Limonins	w
Gibberellin A81	BKBYHSYZKIAJDA-UHFFFAOYNA-N	4658943	CC12CC(CC3(C1C(C45C3CCC(C4)(C(=C)C5)O)C(=O)O)OC2=O)O	0.033	16	4658943	19	-0.304	Gibberellins
(R)C(R)S-S-Propylcysteine sulfoxide	JZKMSAGUCSIIAH-UHFFFAOYNA-N	350625	CCCS(=O)CC(C(=O)O)N	0.0022	6.2	350625	13	-3.524
Trans-Zeatin	UZKQTCBAMSWPJD-FARCUNLSSA-N	449093	C/C(=C\CNC1=NC=NC2=C1NC=N2)/CO	0.0099	5.1	449093	105	-1.082	Cytokinins
Neuromedin N (1-4)	SKGLAZSLOGYCCA-PEFXOJROSA-N	53481582	CC[C@@H](C)[C@H](C(=O)N1CCC[C@H]1C(=O)N[C@@H](CC2=CC=C(C=C2)O)C(=O)N[C@H]([C@H](C)CC)C(=O)O)N	0.007	0.75	53481582	30	-0.944	Oligopeptides
Fomefficinic acid B	DGVHJZPQGFRVEC-JTUHZFRCNA-N	11179204	CC(C)C(=C)CC[C@H]([C@H]1C[C@@H]([C@@]2([C@@]1(CC=C3C2=CC[C@@H]4[C@@]3(CC[C@H](C4(C)C)O)C)C)C)O)C(=O)O	0.005	1.1	11179204	98	6.485	Cholic Acids
Officinoside C	OFIPMYQXNOJVMT-QNXZGNTKNA-N	10962618	C[C@@H]1[C@@H]([C@@H]([C@H]([C@@H](O1)OC(C)(C)[C@@H]2CC[C@]3(CC[C@@H](C(=C)C3C2)O[C@H]4[C@@H]([C@H]([C@@H]([C@H](O4)CO)O)O)O)C)O)O)O	4e-07	6	10962618	11	1.287	Diterpenes
Cichorioside D	AIDJHLWRZXMPHP-OLGSXGAXNA-N	102476811	C[C@H]1[C@@H]2CCC(=C3[C@@H]([C@H]2OC1=O)C(=CC3=O)CO[C@H]4[C@@H]([C@H]([C@@H]([C@H](O4)CO[C@H]5[C@@H]([C@@H]([C@H]([C@@H](O5)C)O)O)O)O)O)O)C	0.0058	7.6	102476811	93	-2.059	Monoterpenes
Skullcapflavone I 2'-(2''-E-cinnamoylglucoside)	FOWHMJBXCXWUGU-ZVAYBFPUNA-N	44258550	COC1=C(C2=C(C(=C1)O)C(=O)C=C(O2)C3=CC=CC=C3O[C@H]4C([C@H]([C@@H](C(O4)CO)O)O)OC(=O)/C=C/C5=CC=CC=C5)OC	0.006	12	44258550	1	2.882	Flavonoids	s
Dehydrovomifoliol	JJRYPZMXNLLZFH-AATRIKPKNA-N	688492	CC1=CC(=O)CC([C@]1(/C=C/C(=O)C)O)(C)C	1.4e-05	1.3	688492	20	0.476	Cyclohexanes	x
Indole	SIKJAQJRHWYJAI-UHFFFAOYSA-N	798	C1=CC=C2C(=C1)C=CN2	0.005	8.3	798	31	1.423	Indoles	n
Tryptophan	QIVBCDIJIAJPQS-VIFPVBQESA-N	6305	C1=CC=C2C(=C1)C(=CN2)C[C@@H](C(=O)O)N	0.0034	6.9	6305	53	-2.023	Amino Acids, Aromatic	q
3-Formylindole	OLNJUISKUQQNIM-UHFFFAOYSA-N	10256	C1=CC=C2C(=C1)C(=CN2)C=O	0.005	8.6	10256	58	1.466	Indoles	l
2-Methylindole	CVSVTCORWBXHQV-UHFFFAOYSA-N	7224	CC1=CC2=CC=CC=C2N1	0.005	8	7224	31	1.659	Indoles	n
Di-2-propenyl sulfide	UBJVUCKUDDKUJF-UHFFFAOYSA-N	11617	C=CCSCC=C	1e-05	1.6	11617	75	2.011	Allyl Compounds
Atrazine-Desethyl	PLVPPLCLBIEYEA-WAYWQWQTSA-N	22563	CC(C)NC1=NC(=NC(=N1)N)Cl	0.0043	6	22563	34	-0.131	Atrazine
cinnamamide	APEJMQOBVMLION-UHFFFAOYSA-N	5273472	C1=CC=C(C=C1)/C=C/C(=O)N	0.005	7.1	5273472	21	1.159	Cinnamates	b
Ala-Phe	LVWYJBNMIMPTHU-SNAWJCMRSA-N	96814	C[C@@H](C(=O)N[C@@H](CC1=CC=CC=C1)C(=O)O)N	0.0044	9.2	96814	92	-1.877	Oligopeptides
Isopimaric acid	MXYATHGRPJZBNA-UHFFFAOYNA-N	442048	C[C@@]1(CC[C@H]2C(=CC[C@@H]3[C@@]2(CCC[C@@]3(C)C(=O)O)C)C1)C=C	0.048	24	442048	19	6.316	Phenanthrenes
N6-Threonylcarbamoyladenosine	YCIAHAYEVBEGKT-UHFFFAOYNA-N	161466	C[C@H]([C@@H](C(=O)O)NC(=O)NC1=C2C(=NC=N1)N(C=N2)[C@H]3[C@@H]([C@@H]([C@H](O3)CO)O)O)O	0.0051	7.8	161466	37	-3.42	Purine Nucleosides
6''-O-Acetylholocalin	NIVXKMKLZUXGSY-UHFFFAOYNA-N	131751960	CC(=O)OCC1C(C(C(C(O1)OC(C#N)C2=CC(=CC=C2)O)O)O)O	0.0048	7.9	131751960	40	-1.56	Iridoids
FAD	VWWQXMAJTJZDQX-UYBVJOGSSA-N	643975	CC1=CC2=C(C=C1C)N(C3=NC(=O)NC(=O)C3=N2)C[C@@H]([C@@H]([C@@H](COP(=O)(O)OP(=O)(O)OC[C@@H]4[C@H]([C@H]([C@@H](O4)N5C=NC6=C(N=CN=C65)N)O)O)O)O)O	1.3e-05	1.5	643975	97	-6.285	Riboflavin
3alpha-Hydroxyoreadone	QWJVXAZUVABFEO-UHFFFAOYNA-N	131751906	CC1(C2CC=C3COC(C3C2C(=O)CC1O)O)C	1.7e-06	1.7	131751906	4	-0.51
Artonin F	GKWNQOINHKVKOT-UHFFFAOYNA-N	14680593	CC(=CCC1=C2C(=C3C(=C1O)C(=O)C4=C(O3)C5=C6C(C4)C(OC6=C(C=C5O)O)(C)C)C=CC(O2)(C)C)C	0.0047	8.3	14680593	29	4.434	Flavonoids
6-Oxocamphor	DGHHQBMTXTWTJV-BQAIUKQQSA-N	382555	CC1(C2CC(=O)C1(C(=O)C2)C)C	0.0047	19	382555	119	1.096		y
10-Hydroxy-3-methoxy-1357-cadinatetraen-9-one	VMEKKHYIQYOLHA-UHFFFAOYNA-N	3504625	CC1=CC2=C(C=C1OC)C(C(=O)C=C2C(C)C)(C)O	0.0061	5.7	3504625	64	2.078	Naphthols
Swiemahogin A	AXPQVXURTHIQGM-IZQLNBHXNA-N	101432180	C[C@]1(CC[C@@H]([C@@]2([C@]1(CC(=O)O2)O)C)[C@]3(C=CC(=O)C([C@@H]3CC(=O)OC)(C)C)C)[C@@H](C4=COC=C4)O	0.0049	9.5	101432180	12	2.073	Diterpenes	w
Toonaciliatin D	UFZHJXOBYWWVDW-JFZQRYCFNA-N	23624916	C[C@@]12C[C@@H]3[C@@H]4[C@]([C@@H](CC(=O)O[C@]4([C@@]15[C@H](O5)C[C@H]2C6=COC=C6)C)C(C)(C)O)([C@H](O3)CC(=O)OC)C	1.6e-06	1.5	23624916	12	2.08	Limonins	w
22-Dimethyl-8-prenylchromene 6-carboxylic acid	MCQWYGYDCGLCJD-UHFFFAOYSA-N	441962	CC(=CCC1=CC(=CC2=C1OC(C=C2)(C)C)C(=O)O)C	0.0036	1.1	441962	64	3.056	Benzoates
Myricatomentoside I	RALVCBWUWHJOGL-UHFFFAOYNA-N	85261151	COC1=C2C=CC(=C1OC3C(C(C(C(O3)CO)O)O)O)CCCCC(=O)CCC4=CC(=C(C=C4)O)O2	1e-08	2	85261151	18	0.887	Lignans
4-Caffeoylquinic acid	GYFFKZTYYAFCTR-PCEXOASVNA-N	9798666	C1[C@H](C([C@@H](CC1(C(=O)O)O)O)OC(=O)/C=C/C2=CC(=C(C=C2)O)O)O	8.3e-06	1.2	9798666	62	-1.129	Cinnamates
Buntansin A	GQYZDAIERJIQDI-UHFFFAOYSA-N	15627934	COC1=C(C=C2C=CC(=O)OC2=C1)C(=O)O	1.2e-05	1.4	15627934	16	0.584	Coumarins	e
Bakkenolide D	LWHLMCCRIWZBQO-CMDGGOBGNA-N	12299954	C[C@H]1CC[C@@H]([C@H]2[C@@]1(C[C@]3([C@@H]2OC(=O)C)C(=C)COC3=O)C)OC(=O)/C=C\SC	1.8e-05	1.3	12299954	4	4.124
NCGC00385086-01 C19H28O10 2-Phenylethyl 2-O-(2S3R4R)-34-dihydroxy-4-(hydroxymethyl)tetrahydro-2-furanyl-beta-D-glucopyranoside	ZRGXCWYRIBRSQA-UHFFFAOYNA-N	10993414	C1[C@@]([C@H]([C@@H](O1)O[C@@H]2[C@H]([C@@H]([C@H](O[C@H]2OCCC3=CC=CC=C3)CO)O)O)O)(CO)O	0.0012	0.83	10993414	40	-1.272	Disaccharides
Sativic acid	VJOGZGLNDROOFS-UHFFFAOYNA-N	92800	CCCCCC(C(CC(C(CCCCCCCC(=O)O)O)O)O)O	0.00018	1.3	92800	59	2.689	OH-FA_18_0_4
Tiglylcarnitine	WURBQCVBQNMUQT-NJUMROAHNA-N	22833596	C/C=C(\C)/C(=O)OC(CC(=O)[O-])C[N+](C)(C)C	0.0015	1.2	22833596	118	-0.004
2-Dodecylbenzenesulfonic acid	WBIQQQGBSDOWNP-UHFFFAOYSA-N	25457	CCCCCCCCCCCCC1=CC=CC=C1S(=O)(=O)O	0.0068	7.6	25457	56	5.911	Benzenesulfonates	z
Xanthoangelol F	XBFSDEKOTLYPJU-SXZUIPJJSA-N	6479088	CC(=CCC/C(=C/CC1=C(C=CC(=C1O)C(=O)/C=C/C2=CC=C(C=C2)O)OC)/C)C	2.7e-05	1.2	6479088	16	5.435	Flavonoids	e
Sinapine	HUJXHFRXWWGYQH-UHFFFAOYSA-O	5280385	C[N+](C)(C)CCOC(=O)/C=C/C1=CC(=C(C(=C1)OC)O)OC	1e-08	2.8	5280385	101	1.003	Cinnamates	v
Citrinin	CQIUKKVOEOPUDV-IYSWYEEDSA-N	54680783	C[C@@H]1[C@H](OC=C2C1=C(C(=C(C2=O)C(=O)O)O)C)C	1e-08	2.6	54680783	106	1.62	Benzopyrans	A
4'7-Dihydroxy-2'-methoxy-3'-prenylisoflavan	ZEJRFMCOSHZBRD-UHFFFAOYNA-N	44257507	CC(=CCC1=C(C=CC(=C1OC)C2CC3=C(C=C(C=C3)O)OC2)O)C	4.4e-06	1.5	44257507	18	3.045	Isoflavones
3a21-Dihydroxy-5b-pregnane-1120-dione	XWYBFXIUISNTQG-XPYNSANSSA-N	44263347	C[C@]12CC[C@H](C[C@H]1CC[C@@H]3[C@@H]2C(=O)C[C@]4([C@H]3CCC4C(=O)CO)C)O	0.0048	21	44263347	10	2.563	11-Hydroxycorticosteroids	B
Sophorasine A	TYNIDTXHMHOCQE-BLASDBQBNA-N	101599922	C[C@@H](C(=O)CN1C[C@@H]2C[C@H](C1)C3=CC=CC(=O)N3C2)O	0.00018	1.4	101599922	43	-0.876
(2xi6xi)-7-Methyl-3-methylene-1267-octanetetrol	GGDOZDCNLKHEMH-UHFFFAOYNA-N	15382184	CC(C)(C(CCC(=C)C(CO)O)O)O	4.8e-06	1.7	15382184	67	-0.955
Cyanidin-3-O-sambubioside-5-O-glucoside	RAHCBDLMLRVOBZ-UHFFFAOYNA-O	74976933	C1C(C(C(C(O1)OC2C(C(C(OC2OC3=C([O+]=C4C=C(C=C(C4=C3)OC5C(C(C(C(O5)CO)O)O)O)O)C6=CC(=C(C=C6)O)O)CO)O)O)O)O)O	0.0044	12	74976933	1	-1.939	Anthocyanins	s
D8'-Merulinic acid C	NRSDQEWAMHRTMK-MDZDMXLPSA-N	5319373	CCCCCCCC/C=C/CCCCCCCC1=C(C(=CC=C1)O)C(=O)O	3.4e-06	4.7	5319373	33	9.783	Salicylates
Santene	LSIXBBPOJBJQHN-UHFFFAOYNA-N	10720	CC1=C(C2CCC1C2)C	0.0028	1.1	10720	119	3.121		y
L-Isoleucine	AGPKZVBTJJNPAG-WHFBIAKZSA-N	6306	CC[C@H](C)[C@@H](C(=O)O)N	0.00056	1.2	6306	13	-1.6	Amino Acids
Rosefuran	UTSGPHXOHJSDBC-UHFFFAOYSA-N	84825	CC1=C(OC=C1)CC=C(C)C	0.0018	1.1	84825	35	2.357	Furans
cathestatin B	JAJMETBQBCMJSZ-IGYFNUTDNA-N	21597398	C1=CC(=CC=C1C[C@@H](C(=O)NCCCCN)NC(=O)[C@@H]2[C@H](O2)C(=O)O)O	0.0062	7.9	21597398	30	-1.679	Epoxy Compounds
(Z)-2-Methyl-6-methylene-27-octadien-1-ol	IEVYLQISZQFFGA-JXMROGBWSA-N	5319723	C/C(=C\CCC(=C)C=C)/CO	8.5e-05	1.1	5319723	25	2.289
Delphinidin-3-O-sambubioside	TWYYVOVDSNRIJM-UHFFFAOYNA-O	74977035	C1C(C(C(C(O1)OC2C(C(C(OC2OC3=CC4=C(C=C(C=C4[O+]=C3C5=CC(=C(C(=C5)O)O)O)O)O)CO)O)O)O)O)O	0.0034	380	74977035	1	-0.285	Anthocyanins	s
NCGC00384740-01 C21H34O9 2(1H)-Azulenone 6-(beta-D-glucopyranosyloxy)-456788a-hexahydro-5-hydroxy-5-(1-hydroxy-1-methylethyl)-38-dimethyl-	ZKDJPRDXYUPPEK-KIVLJSFPNA-N	51136495	CC1CC(C(CC2=C(C(=O)CC12)C)(C(C)(C)O)O)O[C@H]3[C@@H]([C@H]([C@@H]([C@H](O3)CO)O)O)O	0.01	7.8	51136495	93	-1.307	Monoterpenes
Gibberellin A36	JZBLVVPDEDCVQA-WUAMTQAGNA-N	443455	C[C@]1([C@H](CC[C@@]2([C@@H]1[C@@H]([C@]34[C@H]2CC[C@H](C3)C(=C)C4)C(=O)O)C=O)O)C(=O)O	1.1e-05	1.3	443455	19	2.009	Gibberellins
Brianodin B	WRMRTVQZNMWLDP-NCCFVTSUNA-N	24862327	C/C/1=C/[C@H]2[C@]([C@H]([C@@H]3[C@](C=C[C@H]([C@@]3(C)O)OC(=O)C)([C@@H]([C@@H]([C@H]1OC(=O)C)O)OC(=O)C)C)OC(=O)C)([C@](C(=O)O2)(C)O)O	0.00047	1.1	24862327	86	0.059	Diterpenes	C
57-Dihydroxy-3'4'-dimethoxy-8-(3-hydroxy-3-methylbutyl)-isoflavone 7-glucoside	AQOVBCDOFOOETK-QERVRDGFNA-N	10793018	CC(C)(CCC1=C(C=C(C2=C1OC=C(C2=O)C3=CC(=C(C=C3)OC)OC)O)O[C@H]4[C@@H]([C@H]([C@@H]([C@H](O4)CO)O)O)O)O	2.1e-05	1.3	10793018	1	0.835	Flavonoids	s
45-Dimethyl-2-(1-methylethyl)thiazole	GDYKEHYOOVICQZ-UHFFFAOYSA-N	40787	CC1=C(SC(=N1)C(C)C)C	0.00054	1.2	40787	75	1.4
NP-000062(6)	MMDUKUSNQNWVET-UHFFFAOYNA-N	137832344	C1=CC(=CC=C1C2=CC(=O)C3=C(C(=C(C(=C3O2)C4[C@@H]([C@H]([C@@H]([C@H](O4)CO)O)O)O)O)C5[C@@H]([C@H]([C@@H](O5)CO)O)O)O)O	0.005	7.3	137832344	1	-2.309	Flavonoids	s
Euphornin A	GAQMOGICQDOKHD-ISSFDRLWNA-N	101831568	C[C@H]1C[C@]2([C@H]([C@H]1OC(=O)C3=CC=CC=C3)/C=C(\[C@@H](C[C@H](C(/C=C\[C@@H]([C@@H]2OC(=O)C)C)(C)C)OC(=O)C)O)/C)O	0.012	1.4	101831568	28	3.325	Diterpenes	D
Pachyclavulide I	BPTNOPJYGTTXJM-RWPSLRGDNA-N	101446679	C[C@H]1C(=O)O[C@@H]\2[C@@]1([C@H]([C@H]3C(=C[C@H]([C@@H]([C@@]3([C@H](/C=C\C(=C2)\COC)OC(=O)C)C)OC(=O)C)O)C)OC(=O)C)O	0.0067	40	101446679	86	0.675	Diterpenes	C
Ovalitenin A	KEJNXXMRDHDOCO-VQHVLOKHSA-N	10923878	COC1=C(C=CC2=C1C=CO2)C(=O)/C=C/C3=CC=CC=C3	0.00041	1.2	10923878	35	3.064	Isoflavones
(-)-Matairesinol	MATGKVZWFZHCLI-PVRQQBJHNA-N	119205	COC1=C(C=CC(=C1)C[C@H]2COC(=O)[C@@H]2CC3=CC(=C(C=C3)O)OC)O	0.00042	1.2	119205	61	1.515	Lignans
Mahanimbinine	ZMSFODUWJLWJOE-UHFFFAOYNA-N	131750980	CC1=CC2=C(C3=C1OC(C=C3)(C)CCCC(C)(C)O)NC4=CC=CC=C42	0.0026	8	131750980	39	3.9	Indoles	h
Ascorbyl stearate	LITUBCVUXPBCGA-UHFFFAOYNA-N	54725318	CCCCCCCCCCCCCCCCCC(=O)OC[C@@H]([C@@H]1C(=C(C(=O)O1)O)O)O	1.4e-06	1.7	54725318	107	9.35	Epoxy FA_24
Lucidenic acid A	INIPQDKLXQHEAJ-UHFFFAOYNA-N	14109375	C[C@H](CCC(=O)O)[C@H]1CC(=O)[C@@]2([C@@]1(CC(=O)C3=C2[C@H](C[C@@H]4[C@@]3(CCC(=O)C4(C)C)C)O)C)C	2e-05	1.4	14109375	4	1.906	Cholic Acids
(E)-1-Cinnamoylpyrrolidine	JSIGICUAXLIURX-HJWRWDBZSA-N	2056198	C1CCN(C1)C(=O)/C=C\C2=CC=CC=C2	0.012	1.1	2056198	21	2.325	Cinnamates	b
Aspochalasin J	HXVGXVHKKDWYHZ-SNMAPRQANA-N	21576439	C[C@H]1[C@H]2[C@@H](NC(=O)[C@@]23[C@@H](/C=C(/CCC[C@@H](/C=C/C(=O)O3)O)\C)C=C1C)CC(C)C	0.0033	1.2	21576439	73	3.802	Cytochalasins
Deoxyvalidamine	FFRMLFVGYPMNPT-VTPUDEAPNA-N	127490	C1[C@@H]([C@H](C[C@H]([C@H]1N)O)O)CO	0.022	1.2	127490	44	-0.986
Taxuyunnanine P	LYABGXKDPSCBMO-UEEJEOLKNA-N	12050611	CC1=C2[C@H]([C@@H]([C@@]3([C@H](C[C@@H]([C@H]([C@H]3[C@@H]([C@@]2(C[C@@H]1O)C(C)(C)O)O)CO)O)OC(=O)C)C)OC(=O)C)O	3.9e-06	1.5	12050611	6	-0.936	Taxoids	u
Passiguatemalin	GVFAYMLCFVOLFT-FICORQPONA-N	22297232	C1CC(C(C1O)O)(C#N)O[C@H]2[C@@H]([C@H]([C@@H]([C@H](O2)CO)O)O)O	0.0013	4.3	22297232	9	-2.733		c
Chenodeoxycholic acid sulfate	DPVCTIYTPXYDMQ-HEGLNSLBSA-N	21252308	C[C@H](CCC(=O)O)[C@H]1CC[C@@H]2[C@@]1(CC[C@H]3[C@H]2C(C[C@H]4[C@@]3(CC[C@H](C4)O)C)OS(=O)(=O)O)C	6.1e-05	1.3	21252308	10	4.881	Cholates	B
Hydrangenoside E	SYCAAOWPYJBQKF-UHFFFAOYNA-N	21589718	COC(=O)C1=CO[C@H]([C@@H]([C@@H]1C[C@@H]2C[C@H](C[C@@H](O2)CCC3=CC=C(C=C3)O)O)C=C)O[C@H]4[C@@H]([C@H]([C@@H]([C@H](O4)CO)O)O)O	0.025	23	21589718	40	0.58	Iridoids
Rostratamine	GQDQWQRPCUUAFD-ORIVAHKZNA-N	44575623	CC(=O)[C@@]1(CC[C@]2([C@@]1([C@@H](C[C@H]3[C@]2(CC=C4[C@@]3(CC[C@@H](C4)O)C)O)OC(=O)C5=CN=CC=C5)C)O)O	5.7e-07	1.6	44575623	36	-0.333	Sesquiterpenes	k
Trimethoprim	RIOXQFHNBCKOKP-UHFFFAOYSA-N	5578	COC1=CC(=CC(=C1OC)OC)CC2=CN=C(N=C2N)N	3.2e-05	1.2	5578	45	-0.545	Pyrimidines
Gibberellin A37 glucosyl ester	BQKJRWQLMRWZET-UHFFFAOYNA-N	131752406	CC12C(CCC3(C1C(C45C3CCC(C4)C(=C)C5)C(=O)OC6C(C(C(C(O6)CO)O)O)O)COC2=O)O	8.2e-06	1.3	131752406	55	0.987	Triterpenes	F
Tetrahydrofolyl-Glu(n)	RXWVHRYZTWZATH-UHFFFAOYNA-N	136948345	C1C(NC2=C(N1)N=C(NC2=O)N)CNC3=CC=C(C=C3)C(=O)NC(CCC(=O)NC(CCC(=O)NC(CCC(=O)O)C(=O)O)C(=O)O)C(=O)O	2e-06	1.6	136948345	48	-5.476	Formyltetrahydrofolates
Dysoxylin C	LGJGIWPBFNKQNM-YWZVHLDRNA-N	102401805	CCC(C)C(=O)O[C@@H]1C2[C@H]3[C@](CO2)([C@@H](C[C@@H]([C@@]3([C@@H]4[C@@]1(C5=CC[C@H]([C@@]5([C@H](C4)OC(=O)C)C)C6CC(=O)OC6)C)C)OC(=O)C)O)C	0.046	5.2	102401805	6	3.364	Triterpenes	u
Aurantiomide B	QLECHXLRCYDOPS-WDCZEDIGNA-N	16680721	CC(C)C[C@]1(C2=NC3=CC=CC=C3C(=O)N2[C@H](C(=O)N1)CCC(=O)N)O	2.4e-05	1.3	16680721	48	-0.694	Quinazolines
Ajugalactone	LLPOMLNTBDOEOC-LPZASMAENA-N	181744	CCC1=C(C(=O)O[C@H](C1)[C@@](C)([C@H]2CC[C@@]3([C@@]2(C(=O)C[C@H]4C3=CC(=O)[C@H]5[C@@]4(C[C@@H]([C@@H](C5)O)O)C)C)O)O)C	3.4e-06	1.3	181744	4	-0.011	Withanolides
57-Dihydroxy-8-3'4'5'-tetramethoxyflavone 5-O-rhamnoside-6-C-glucoside	UQHLTUQPRGENNU-MUMCTMMINA-N	44258619	C[C@H]1[C@@H](C(C([C@@H](O1)OC2=C(C(=C(C3=C2C(=O)C=C(O3)C4=CC(=C(C(=C4)OC)OC)OC)OC)O)[C@H]5C([C@H]([C@@H](C(O5)CO)O)O)O)O)O)O	8.2e-06	1.5	44258619	1	-0.269	Flavonols	s
(S)-Oleuropeic acid	BFYWJELXORKNFO-UHFFFAOYNA-N	12313716	CC(C)(C1CCC(=CC1)C(=O)O)O	0.00029	1.2	12313716	20	0.914	Cyclohexanes	x
Citrusin B	XMGKCJUCYBLMBY-PLNGDYQANA-N	11972318	COC1=CC(=CC(=C1OC(CO)C(C2=CC(=C(C=C2)O[C@H]3[C@@H]([C@H]([C@@H]([C@H](O3)CO)O)O)O)OC)O)OC)/C=C/CO	0.00047	0.94	11972318	18	-0.721	Lignans
Kaempferol	IYRMWMYZSQPJKC-UHFFFAOYSA-N	5280863	C1=CC(=CC=C1C2=C(C(=O)C3=C(C=C(C=C3O2)O)O)O)O	0.0047	5.7	5280863	16	1.486	Flavonols	e
Cyanidine-3-O-sambubioside	ZPPQIOUITZSYAO-UHFFFAOYNA-O	74976920	C1C(C(C(C(O1)OC2C(C(C(OC2OC3=CC4=C(C=C(C=C4[O+]=C3C5=CC(=C(C=C5)O)O)O)O)CO)O)O)O)O)O	0.0044	5.7	74976920	1	-0.633	Anthocyanins	s
Luteolin-4'-O-glucoside	PEFNSGRTCBGNAN-QNDFHXLGSA-N	12304738	C1=CC(=C(C=C1C2=CC(=O)C3=C(C=C(C=C3O2)O)O)O)OC4[C@@H]([C@H]([C@@H]([C@H](O4)CO)O)O)O	0.0075	1	12304738	1	-0.249	Glucosides	s
Dantaxusin C	MOYWWZOOLCCTFX-XRYBAJIBNA-N	10985288	CC(=O)O[C@H]1C[C@@H](C(=C)[C@@H]2[C@@]1([C@H]([C@@H]([C@]34[C@](O3)(C(=O)C[C@@H]([C@H]2OC(=O)C)C4(C)C)C)OC(=O)C)OC(=O)C)C)OC(=O)/C=C/C5=CC=CC=C5	7e-07	0.29	10985288	85	3.707	Taxoids	G
Serratine	SWDKDXWGADMDSP-HWSQZMMLNA-N	442500	C[C@@]1(C[C@H]2CC(=O)[C@@]34[C@@]2(CCCN3CCC4)[C@H](C1)O)O	0.00032	0.82	442500	117	0.147		H
Cimilactone A	RKTWPXXLEHCPIO-YEBZOTOENA-N	10908062	C[C@@H]1CC(=O)O[C@@H]2[C@H]1[C@]3([C@@H](C[C@@]45C[C@@]46CC[C@@H](C([C@@H]6CC[C@H]5[C@@]3(C2)C)(C)C)O[C@H]7[C@@H]([C@H]([C@@H](CO7)O)O)O)OC(=O)C)C	0.008	8.6	10908062	82	5.425	Glycosides
Favolon	SDVHFMSSWIIGCL-CFCCTYEHNA-N	10348402	C[C@@H]([C@H]1CC[C@@H]2[C@@]1(C[C@@H]3[C@]4([C@@H]2C(=O)[C@H]5[C@@]6([C@@]4(CC[C@@H](C6)OC(=O)C(C(C)(C)O)O)C)O5)O3)C)C(=O)C(C(C)C(C)C)O	9.4e-05	1.2	10348402	60	3.239	Glycosides
(8alpha10beta11beta)-3-Hydroxy-415-dinor-1(5)-xanthen-128-olide	MOXJTUNOIGNZKZ-UHFFFAOYNA-N	73232471	CC1CC2C(CC=C1CCO)C(C(=O)O2)C	1.1e-05	1.4	73232471	108	1.174	Xanthenes	I
Diosphenol	QSIMLPCPCXVYDD-UHFFFAOYNA-N	79023	CC1=C(C(=O)C(CC1)C(C)C)O	0.046	1.1	79023	20	2.164		x
Eleganoside B	BJJIXMQSMBBRTG-FKNSVFJLNA-N	101085912	CCCCCCCCO[C@H]1C[C@]2([C@@H]([C@@]1(C)O)[C@@H](OC=C2C(=O)OC)O[C@H]3[C@@H]([C@H]([C@@H]([C@H](O3)CO)O)O)O)O	1.4e-07	1.6	101085912	102	1.625	Iridoids	J
Kadsurarin	DHEFJFKRWXSOLG-GXDHUFHONA-N	101072554	CC1C(C2=CC3=C(C(=C2C4=C(C(=C(C=C4C(C1(C)O)OC(=O)C=C(C)C)OC)OC)OC)OC)OCO3)OC(=O)C	1.8e-07	1.5	101072554	18	3.795	Lignans
333-tetramine	ZAXCZCOUDLENMH-UHFFFAOYSA-N	78350	C(CN)CNCCCNCCCN	5.5e-06	1.3	78350	34	-1.04	Polyamines
2457alpha-Tetrahydro-1447a-tetramethyl-1H-inden-2-ol	MHUYBIUXLMLCJM-UHFFFAOYNA-N	66963592	CC1C(C=C2C1(C=CCC2(C)C)C)O	0.00047	1.1	66963592	67	3.497	Dehydrocholesterols
Leopersin N	CHGSKJMRTUWQRQ-HQVUBUCUNA-N	15834303	CC(=O)O[C@]1(C(=O)[C@@H]2[C@H]3[C@](CCC[C@@]3([C@@]14CC[C@@]5(O4)C[C@@H](OC5)OC)C)(C(=O)O2)C)C	2e-08	1.6	15834303	60	1.642
Taxagifine	FQCUWQFKTUBVLA-YIVAOXQANA-N	44316472	CC(=O)O[C@H]1C[C@@H](C(=C)[C@@H]2[C@@]1([C@H]([C@@H]([C@@]3([C@]4(CO[C@@]3(C(=O)C[C@H]4[C@H]2OC(=O)C)C)C)O)OC(=O)C)OC(=O)C)C)OC(=O)/C=C/C5=CC=CC=C5	2.6e-07	1.2	44316472	85	2.575	Taxoids	G
Gagunin J	ACETYDTUPLBCGS-JMZNUKMQNA-N	25135700	CCCC(=O)O[C@H]1C[C@@]2([C@H](C=C([C@@H]([C@@H]([C@H]2OC(=O)CCC)OC(=O)C)O)C)[C@@H]3[C@]1([C@H]([C@@H]([C@@H]3C(C)C)OC(=O)CCC)OC(=O)CC)C)C	2.7e-06	1.4	25135700	6	6.088	Taxoids	u
Leucascandrolide A	DJSCTOCFSZYDND-FKNNPDMINA-N	10818492	C[C@H]1CC[C@H]2C[C@@H](OC(=O)C[C@H]3C[C@@H](C[C@H](O3)C[C@H](C[C@H]1O2)OC)OC(=O)/C=C\CCC4=COC(=N4)/C=C\CNC(=O)OC)/C=C/CC(C)C	0.0061	9.8	10818492	72	5.709	Sesquiterpenes	K
Soyasaponin I methyl ester	ZEIAROWTCSYWFT-UIADHOMFNA-N	21629875	C[C@H]1[C@@H]([C@H]([C@H]([C@@H](O1)O[C@@H]2[C@H]([C@H]([C@H](O[C@H]2O[C@@H]3[C@H]([C@@H]([C@H](O[C@H]3O[C@H]4CC[C@]5([C@H]([C@@]4(C)CO)CC[C@@]6([C@@H]5CC=C7[C@]6(CC[C@@]8([C@H]7CC(C[C@H]8O)(C)C)C)C)C)C)C(=O)OC)O)O)CO)O)O)O)O)O	6e-06	5	21629875	26	4.906	Saponins	L
Siderochelin C	PUARYECATSVDEK-WYVADAIZNA-N	146793	CC[C@]1(C[C@H](N=C1C2=C(C=CC=N2)O)C(=O)N)O	0.00031	3.9	146793	43	-1.512	Pyridines
Pelargonidin-3-O-glucoside	ABVCUBUIXWJYSE-UHFFFAOYNA-O	12302249	C1=CC(=CC=C1C2=[O+]C3=CC(=CC(=C3C=C2OC4C(C(C(C(O4)CO)O)O)O)O)O)O	0.008	8	12302249	1	0.313	Flavonols	s
Genistein	OBWHQJYOOCRPST-UHFFFAOYSA-N	5280961	C1=CC(=CC=C1C2=COC3=CC(=CC(=C3C2=O)O)O)O	0.0051	6.8	5280961	16	1.043	Isoflavones	e
Apiin	OMWBSQBBFSNJKL-SFGIUNDLNA-N	5280746	C1[C@@]([C@H]([C@@H](O1)O[C@@H]2[C@H]([C@@H]([C@H](O[C@H]2OC3=CC(=C4C(=C3)OC(=CC4=O)C5=CC=C(C=C5)O)O)CO)O)O)O)(CO)O	0.0046	5.9	5280746	1	-1.505	Flavonoids	s
PA(15:022:6(4Z7Z10Z13Z16Z19Z))	AUQJMTAYSKRMCC-FRGLPGJGSA-N	52928751	CCCCCCCCCCCCCCC(=O)OC[C@H](COP(=O)(O)O)OC(=O)CC/C=C\C/C=C\C/C=C\C/C=C\C/C=C\C/C=C\CC	0.0063	10	52928751	2	14.365	Phosphatidic Acids	M
Isothalirine	QAQKPFYSONCQAR-UHFFFAOYNA-N	15907630	CN1CCC2=CC(=C(C=C2C1CC3=CC(=C(C=C3OC4=C(C(=C5CCN(C(C5=C4)CC6=CC(=C(C=C6)OC)OC)C)OC)OC)OC)OC)OC)OC	0.0058	9.3	15907630	8	4.115	Benzylisoquinolines	N
Tinosineside A	GADVYUZLGRAFKB-FCQHHSGBNA-N	101918066	CC(=O)O[C@H]1[C@H](C[C@H]([C@@H]2[C@@H]1[C@@]3(C[C@H](OC(=O)[C@@]3(CC2)O)C4=COC=C4)C)O[C@H]5[C@@H]([C@H]([C@@H]([C@H](O5)CO)O)O)O)O	0.0082	0.94	101918066	12	-0.613	Limonins	w
Tectorigenin	MBNGWHIJMBWFHU-UHFFFAOYSA-N	5281811	COC1=C(C2=C(C=C1O)OC=C(C2=O)C3=CC=C(C=C3)O)O	0.0042	11	5281811	29	1.283	Isoflavones
5-6-34-dihydroxy-4-(hydroxymethyl)oxolan-2-yloxymethyl-345-trihydroxyoxan-2-yloxy-4-(34-dihydroxyphenyl)-7-methoxychromen-2-one	YONLJLRPNAUKHY-UHFFFAOYNA-N	23983728	COC1=CC2=C(C(=CC(=O)O2)C3=CC(=C(C=C3)O)O)C(=C1)OC4C(C(C(C(O4)COC5C(C(CO5)(CO)O)O)O)O)O	0.0048	9.6	23983728	1	-0.836	Flavonoids	s
Gibberellin A20	OXFPYCSNYOFUCH-NYJSUMFWNA-N	5280481	C[C@@]12CCC[C@@]3([C@@H]1[C@@H]([C@]45[C@H]3CC[C@](C4)(C(=C)C5)O)C(=O)O)OC2=O	4.1e-06	1.3	5280481	49	0.726	Saturated_Fatty Acids
Methyl (2E6Z)-dodecadienoate	IYSZVOVZPVKXIJ-OFALOCIGSA-N	6438202	CCCCC/C=C\CC/C=C/C(=O)OC	0.00038	1.2	6438202	116	4.988	UnSaturated FA	O
Aspergillimide	RTNMRJRMTGSUAE-MFYQJFMMNA-N	70698047	C[C@@H]1CCN2[C@@]13C[C@H]4[C@@](C2)(C[C@]5(C4(C)C)CC(=O)N(C5=O)C)N(C3=O)C	0.004	10	70698047	117	0.401	Hydrocarbons, Cyclic	H
D-rhodosamine	WMUYJHSRMOORHK-PRJMDXOYSA-N	5460917	C[C@H]([C@@H]([C@@H](CC=O)N(C)C)O)O	0.00037	1.2	5460917	70	-0.867	Hexosamines
3-Methoxyfaurithaline	OHRAOGOGUKPFCC-OBXPXUJENA-N	21581050	CN1CCC2=C3[C@@H]1CC4=C(C3=C(C(=C2OC)OC)OC)C(=C(C=C4OC5=C(C=CC(=C5)C[C@H]6C7=CC(=C(C=C7CCN6C)OC)O)OC)OC)O	1.7e-06	1.4	21581050	8	3.227	Benzylisoquinolines	N
Cephalosporin P1	YJJWILCYIMMPAS-XFYKWXKONA-N	3037114	C[C@@H]1[C@@H](CC[C@]2([C@H]1[C@H]([C@@H]([C@]3([C@H]2CC[C@@H]\4[C@@]3(C[C@@H](/C4=C(/CCC=C(C)C)\C(=O)O)OC(=O)C)C)C)O)OC(=O)C)C)O	7e-05	1.3	3037114	6	5.403	Withanolides	u
PIM2(17:018:0)	OAPLXIVHZHONPH-LOSQAETFNA-N	126457428	CCCCCCCCCCCCCCCCCC(=O)O[C@H](COC(=O)CCCCCCCCCCCCCCCC)COP(=O)(O)OC1[C@@H](C(C(C(C1O[C@H]2[C@H](C([C@H](C(O2)CO)O)O)O)O)O)O)O[C@@H]3[C@@H](C([C@@H](C(O3)CO)O)O)O	0.024	26	126457428	51	11.006		P
PGP(18:018:2(9Z12Z))	BEGQHSCGKQAIAS-KKUBIFFLSA-N	53481825	CCCCCCCCCCCCCCCCCC(=O)OC[C@H](COP(=O)(O)OC[C@H](COP(=O)(O)O)O)OC(=O)CCCCCCC/C=C\C/C=C\CCCCC	0.0047	11	53481825	76	13.013	Phosphatidylethanolamines
Blumenol C glucoside	NYLNHNDMNOPWAZ-UHFFFAOYNA-N	14135395	CC1=CC(=O)CC([C@H]1CC[C@@H](C)O[C@H]2[C@@H]([C@H]([C@@H]([C@H](O2)CO)O)O)O)(C)C	0.00057	1.1	14135395	41	1.211	Carotenoids
p-Cymene	HFPZCAJZSCWRBC-UHFFFAOYSA-N	7463	CC1=CC=C(C=C1)C(C)C	0.00022	1.2	7463	56	3.834	Monoterpenes	z
argeloside C	SBYKFQMNFNKJPZ-CXTLOLCSSA-N	101746052	C[C@@H]1[C@H]([C@@H]([C@H]([C@@H](O1)O[C@@H]2[C@H](O[C@H](C[C@H]2OC)O[C@@H]3[C@H](O[C@H](C[C@@H]3OC)O[C@@H]4[C@H](O[C@H](C[C@H]4OC)O[C@H]5CC[C@@]6([C@H]7CC[C@@]8([C@@H]9[C@H]1CO[C@@]9(O[C@]8([C@@H]7CC=C6C5)O1)C)C)C)C)C)C)O)OC)O	0.0051	10	101746052	7	2.885	Saponins	Q
(1S2R4R8S)-p-Menthane-289-triol 9-glucoside	KRTKKVIKRTZKGY-UHFFFAOYNA-N	73809749	CC1CCC(CC1O)C(C)(COC2C(C(C(C(O2)CO)O)O)O)O	0.0056	1.1	73809749	68	-0.783	Triterpenes	o
Chabrolohydroxybenzoquinone G	IWXGRDWGOJXZGA-QETKOWGUNA-N	5326356	CC1=CC(=C(C=C1O)/C=C\C(C)(CC/C=C(\C)/CC[C@H]([C@](C)(CCC=C(C)C)O)OC(=O)C)O)O	0.017	1.1	5326356	96	4.825	Benzopyrans	R
Cuniloside	JOLLIDAUJSAZHE-XFJFLBFJNA-N	10052127	CC(C)([C@H]1CCC(=CC1)C(=O)OC[C@@H]2[C@H]([C@@H]([C@H]([C@@H](O2)OC(=O)C3=CC[C@H](CC3)C(C)(C)O)O)O)O)O	0.0011	5.2	10052127	41	0.913	Monoterpenes
Catheduline E2	JNJVNIAUYUVQJX-QJISGKSZNA-N	442517	C[C@@H]1C[C@@H]([C@@H]([C@@]2([C@]13C[C@@H]([C@H]([C@@H]2OC(=O)C4=CC=CC=C4)OC(=O)C5=CN=CC=C5)C(O3)(C)C)COC(=O)C6=CN=CC=C6)OC(=O)C)OC(=O)C	0.0039	1.1	442517	36	2.614	Sesquiterpenes	k
Spirotryprostatin C	YPSDDVCGIHETLQ-WQTWIUDHNA-N	25034616	CC(=CCN1C2=C(C=CC(=C2)OC)[C@]3(C1=O)[C@@H](N4C(=O)[C@@H]5CCCN5C(=O)[C@@]4([C@H]3O)O)C=C(C)C)C	1.8e-07	1.6	25034616	109	1.043		E
Phomopsin B	FHJKRASPFQAQCV-VGBCPRNWNA-N	131752487	CC/C(=C(\C(=O)N/C(=C/C(=O)O)/C(=O)O)/NC(=O)C1C=CCN1C(=O)C2C(OC3=C(C=CC(=C3)C(C(C(=O)NC(C(=O)N2)C(=C)C)NC)O)O)(C)CC)/C	0.0015	0.96	131752487	74	-0.278	Benzodiazepines
Fucalpha1-2Galalpha1-3Galbeta1-4Glcbeta-Cer(d18:116:0)	VGTSDXWPYPPYSM-YVEJXIANNA-N	44261852	CCCCCCCCCCCCCCCC(=O)N[C@@H](CO[C@H]1C([C@H]([C@@H](C(O1)CO)O[C@H]2C([C@H]([C@H](C(O2)CO)O)O[C@@H]3C([C@H]([C@H](C(O3)CO)O)O)O[C@H]4[C@H](C(CC(O4)C)O)O)O)O)O)[C@@H](/C=C/CCCCCCCCCCCCC)O	0.0062	1.1	44261852	46	8.671	Trihexosylceramides
Kansuinin H	JUCOOGZXMGBGJB-TVLXFDHANA-N	101353185	C[C@H]1[C@@H]2[C@]3(C[C@@]([C@@H]([C@@H]3[C@H](C(=C)[C@@H]([C@H]([C@H](C([C@H](C1=O)O2)(C)C)OC(=O)C)OC(=O)C4=CC=CC=C4)OC(=O)C)OC(=O)C)OC(=O)C)(C)O)OC(=O)C	0.00089	1.1	101353185	28	2.419	Diterpenes	D
Piptocarphin A	BZQDHZDSIXPDSS-OKRQSNPDNA-N	101085410	CC(=C)C(=O)O[C@@H]1C[C@@]([C@]2(CC[C@](O2)(/C=C/3\C1=C(C(=O)O3)COC(=O)C)C)O)(C)O	2.3e-05	1.3	101085410	38	1.313	Macrolides	S
Fasciculol F	YKNPFZYHSXIFMX-UHFFFAOYNA-N	128270	C[C@@]12CC[C@@H]([C@]1([C@H](CC3=C2CCC4[C@@]3(C[C@H]([C@@H](C4(C)C)O)OC(=O)CC(C)(CC(=O)NCC(=O)OC)O)C)O)C)[C@@H](CC[C@H](C(C)(C)O)O)CO	0.00014	1.5	128270	73	1.907	Triterpenes
Traversianal	ZCTUNYRXJKLWPY-UHFFFAOYNA-N	6442110	C[C@@H]1CC(=O)[C@]/2([C@@H]1C[C@]3(CC[C@@H]([C@@H]3C/C=C2/C=O)C(=C)C)C)O	1.7e-07	1.6	6442110	20	4.876	Diterpenes	x
Capsianoside V	XQQKZIVFXGPJHN-KMRBWUSPNA-N	14610543	C/C(=C\CC/C(=C/CCC(C)(C=C)OC1C(C(C(C(O1)CO)O)O)O)/CO)/CC(/C=C(\C)/C(=O)O)O	1.4e-07	1.8	14610543	80	0.271	Macrolides
PS(15:1(9Z)18:2(9Z12Z))	AIWIBHBAGSYABQ-SZGFWDSJNA-N	52925284	CCCCC/C=C\CCCCCCCC(=O)OC[C@H](COP(=O)(O)OC[C@@H](C(=O)O)N)OC(=O)CCCCCCC/C=C\C/C=C\CCCCC	0.02	1.3	52925284	3	9.943	Phosphatidylserines
12-Bis(1-ethoxyethoxy)propane	TZVJNJVDGXFMCF-UHFFFAOYNA-N	5362566	CCOC(C)OCC(C)OC(C)OCC	6.9e-06	1.5	5362566	9	1.95		c
3-Hydroxynonyl acetate	RTYFAKSWXDNPPU-UHFFFAOYNA-N	234237	CCCCCCC(CCOC(=O)C)O	9.7e-07	1.6	234237	59	2.984	O=FA_11_0
Matesaponin 2	ZGNBKNDOCCHRSM-UHFFFAOYNA-N	73157195	CC1CCC2(CCC3(C(=CCC4C3(CCC5C4(CCC(C5(C)C)OC6C(C(C(CO6)O)OC7C(C(C(C(O7)CO)O)O)O)OC8C(C(C(C(O8)C)O)O)O)C)C)C2C1C)C)C(=O)OC9C(C(C(C(O9)CO)O)O)O	0.0023	1.1	73157195	57	4.412	Triterpenes
PS(14:1(9Z)14:1(9Z))	BPFJDFFAZFFCBH-QPBIGPORSA-N	52926026	CCCC/C=C\CCCCCCCC(=O)OC[C@H](COP(=O)(O)OC[C@@H](C(=O)O)N)OC(=O)CCCCCCC/C=C\CCCC	7e-08	1.6	52926026	3	7.425	Phosphatidylserines
Scoparasin B	YXSYADYLBHSOLA-MWOLTELDNA-N	11642398	C[C@H]1C/C=C/[C@H]2[C@@H]([C@]([C@H]([C@@H]3[C@]2(C(=O)N[C@H]3CC4=CC=C(C=C4)OC)OC(=O)O/C=C/[C@@](C1=O)(C)O)C)(C)O)O	0.0043	14	11642398	66	1.331		f
PS(P-18:018:4(6Z9Z12Z15Z))	OAXXFXVAVZAIRI-HKFLZXADNA-N	52926225	CCCCCCCCCCCCCCCC/C=C\OC[C@H](COP(=O)(O)OC[C@@H](C(=O)O)N)OC(=O)CCCC/C=C\C/C=C\C/C=C\C/C=C\CC	0.00043	3.7	52926225	3	12.05	Phosphatidylserines
Andrachcinidine	GFVMHSQLCIEXNG-PCRUOVEUNA-N	101056755	CCC[C@H](C[C@H]1CCC[C@H](N1)CC(=O)C)O	4.8e-07	1.6	101056755	70	2.461	Piperidines
Tricalysioside T	IKBFZZPRIOQBPZ-AOHHEPDGNA-N	24749675	C[C@]1(CCC[C@@]2([C@@H]1CC[C@]34[C@H]2CC[C@H](C3)[C@]([C@@H]4O)(CO)O)C)CO[C@H]5[C@@H]([C@H]([C@@H]([C@H](O5)CO)O)O)O	2.1e-06	1.2	24749675	27	2.636	Triterpenes
Dehydrofalcarinone	HLHBDMWPPKHNDQ-KHPPLWFESA-N	5281145	C=CCCCCC/C=C\CC#CC#CC(=O)C=C	1.5e-07	1.8	5281145	116	6.291		O
Dendronpholide L	LLASBBKHEICHEF-IAJBXFBYNA-N	102395383	CCOC(=O)C(=C)[C@@H]1CC[C@@]([C@H]2CC[C@@](O2)([C@H](CC[C@]([C@H](C1)O)(C)O)OC(=O)C)C)(C)O	1.6e-06	1.4	102395383	102	2.539	Hydrocarbons, Cyclic	J
Sucrose acetate isobutyrate	UVGUPMLLGBCFEJ-ROWWBAASNA-N	31339	CC(C)C(=O)OC[C@@H]1[C@H]([C@@H]([C@](O1)(COC(=O)C)O[C@@H]2[C@@H]([C@H]([C@@H]([C@H](O2)COC(=O)C)OC(=O)C(C)C)OC(=O)C(C)C)OC(=O)C(C)C)OC(=O)C(C)C)OC(=O)C(C)C	1.2e-05	1.4	31339	94	3.345
Fomitopsin A	SBQVJLOKEGLUHV-TYRRJVDONA-N	101763180	C[C@H](CC(=O)C(=C)C(C)C(=O)O)[C@H]1CC[C@@]2([C@@]1([C@@H](CC3=C2CC[C@@H]4[C@@]3(CC[C@H](C4(C)C)OC(=O)CC(=O)O)C)O)C)C	0.0001	1.3	101763180	4	5.142	Cholic Acids
Ganoderic acid AP2	QLPXRZYNNFETED-NBCZPYCZNA-N	101863398	C[C@H](CC/C=C(\C)/C(=O)O)[C@H]1C[C@@H]([C@@]2([C@@]1([C@@H](C(=O)C3=C2CC[C@@H]4[C@@]3(CC[C@@H](C4(C)C)O)C)OC(=O)C)C)C)OC(=O)C	0.0074	8.9	101863398	4	5.202	Withanolides
Capsianoside III	AKJRMUURRHAKDT-DRPMNEMANA-N	131751201	CC1C(C(C(C(O1)OCC2C(C(C(C(O2)OC3C(C(C(OC3OC/C(=C/CC/C(=C\CC/C(=C/CCC(C)(C=C)OC4C(C(C(C(O4)CO)O)O)OC5C(C(C(C(O5)CO)O)O)O)/C)/C)/C)CO)O)O)O)O)O)O)O)O	0.00017	1.2	131751201	52	-1.893	Glycolipids
NCGC00385079-01 C19H34O7 4-(4-Hydroxy-266-trimethyl-1-cyclohexen-1-yl)-2-butanyl beta-D-glucopyranoside	UJRMJTIXXKZFGB-UHFFFAOYNA-N	51136504	CC1=C(C(CC(C1)O)(C)C)CCC(C)O[C@H]2[C@@H]([C@H]([C@@H]([C@H](O2)CO)O)O)O	0.0022	1.1	51136504	11	0.473	Diterpenes
NCGC00385284-01 C32H54O13 (2E)-5-{(1R4aS5S6R8aS)-5-(beta-D-Glucopyranosyloxy)methyl-6-hydroxy-58a-dimethyl-2-methylenedecahydro-1-naphthalenyl}-3-methyl-2-penten-1-yl beta-D-glucopyranoside	QIOMMMCQFIBVKA-MHWRWJLKNA-N	13855771	C/C(=C\CO[C@H]1[C@@H]([C@H]([C@@H]([C@H](O1)CO)O)O)O)/CC[C@@H]2C(=C)CC[C@H]3[C@]2(CC[C@H]([C@]3(C)CO[C@H]4[C@@H]([C@H]([C@@H]([C@H](O4)CO)O)O)O)O)C	1e-05	1.2	13855771	11	1.445	Diterpenes
Vitamin A	FPIPGXGPPPQFEQ-OVSJKPMPSA-N	445354	CC1=C(C(CCC1)(C)C)/C=C/C(=C/C=C/C(=C/CO)/C)/C	5.5e-06	1.5	445354	95	6.158	Carotenoids
Darutoside	QWWPCQGHWWNGET-UHFFFAOYNA-N	44715524	C[C@@]1(CC[C@@H]2C(=C1)CC[C@H]3[C@]2(CC[C@H](C3(C)C)O[C@H]4[C@@H]([C@H]([C@@H]([C@H](O4)CO)O)O)O)C)[C@H](CO)O	2.2e-06	1.5	44715524	11	2.133	Diterpenes
Retinoic acid	QPRQNCDEPWLQRO-SJAWMATLNA-N	444795	CC1=C(C(CCC1)(C)C)/C=C/C(=C/C=C/C(=C/C(=O)O)/C)/C	4.8e-06	1.3	444795	95	6.254	Vitamin A
Capsianoside I	ISQUNAAALVXWGI-DFTZOVBQNA-N	14610541	C/C(=C\CCC(C)(C=C)OC1C(C(C(C(O1)CO)O)O)OC2C(C(C(C(O2)CO)O)O)O)/CC/C=C(\C)/CC(/C=C(\C)/C(=O)O)O	1.2e-05	1.2	14610541	80	0.615	Macrolides
Lagerstroemine	RYMSMTOEKVDTDB-UHFFFAOYNA-N	78385190	COC1=C(C2=C(C=C1)C3CC(CC4N3CCCC4)OC(=O)CCC5=CC2=C(C=C5)O)OC	0.005	8.4	78385190	8	2.911	Quinolizidines	N
Spiroidesin	XFLVJFHNXBWJDL-NCRUWMDKNA-N	637849	CCCCCC(=O)N[C@H](CCC1=CC=C(C=C1)O)C(=O)N[C@@H](CCC2=CC=C(C=C2)O)C(=O)N[C@H](CC3=CC=CC=C3)C(=O)O	4e-06	0.23	637849	30	3.587	Lipopeptides
Indole-3-acetyl-L-isoleucine	WPTUQMUCTTVOFW-BONVTDFDSA-M	644226	CC[C@H](C)[C@@H](C(=O)O)NC(=O)CC1=CNC2=CC=CC=C21	9.2e-07	1.5	644226	53	1.727	Oligopeptides	q
alpha-Ionol O-arabinosyl-(1->6)-glucoside	MITNBWXSDQNKSU-BQYQJAHWNA-N	131752442	CC1=CCCC(C1/C=C/C(C)OC2C(C(C(C(O2)COC3C(C(C(O3)CO)O)O)O)O)O)(C)C	0.0073	6.7	131752442	41	1.869	Glucosides
Protophomin	NNDRVGKCDJPTHD-MZXHRGIVNA-N	102239730	C[C@@H]1CCCC/C=C\C(=O)[C@]23[C@@H](/C=C\C1)C(=O)C(=C([C@H]2[C@@H](NC3=O)CC4=CC=CC=C4)C)C	0.006	7.2	102239730	110	5.07	Cytochalasins	T
alpha-Irone	JZQOJFLIJNRDHK-CMDGGOBGNA-N	5371002	CC1CC=C(C(C1(C)C)/C=C/C(=O)C)C	0.014	1	5371002	42	4.611	Carotenoids
Manassantin A	ZGXXNVOBEIRACL-LJLMIKCGNA-N	15605952	C[C@@H]1[C@H]([C@H](O[C@@H]1C2=CC(=C(C=C2)O[C@H](C)[C@@H](C3=CC(=C(C=C3)OC)OC)O)OC)C4=CC(=C(C=C4)O[C@H](C)[C@@H](C5=CC(=C(C=C5)OC)OC)O)OC)C	2.6e-07	0.27	15605952	18	4.79	Lignans
Butyl 3'-O-acetyl-2'-O-butanoyl-464'-tri-O-(2-methylpropanoyl)-neohesperidoside	WXMKBABSBCDFIM-PDNYMXBBNA-N	56940686	CCCCO[C@H]1C([C@H]([C@@H](C(O1)COC(=O)C(C)C)OC(=O)C(C)C)O)O[C@H]2C([C@H]([C@H](C(O2)C)OC(=O)C(C)C)OC(=O)C)OC(=O)CCC	0.022	1.2	56940686	94	3.353	Disaccharides
3-O-acetylecdysone 2-phosphate	MYOZIWALDKJCBG-KXCOSXAXSA-N	23657836	C[C@@H]([C@H]1CC[C@@]2([C@@]1(CC[C@H]3C2=CC(=O)[C@H]4[C@@]3(C[C@@H]([C@@H](C4)OC(=O)C)OP(=O)(O)O)C)C)O)[C@@H](CCC(C)(C)O)O	1.4e-05	1.4	23657836	4	1.041	Withanolides
Pentandroside C	IOPZVHATZOARDL-FBUFDRGANA-N	101361933	C[C@@H](CC[C@@H]([C@@H](C)[C@H]1[C@H](C[C@@H]2[C@@]1(C[C@H]([C@H]3[C@H]2CCC4=CC(=O)CC[C@]34C)O)C)O[C@H]5[C@@H]([C@H]([C@@H](CO5)O)O[C@H]6[C@@H]([C@H]([C@@H]([C@H](O6)CO)O)O)O)O)O)CO	0.0022	6.8	101361933	32	-0.34	Triterpenes
(+)-vulgraon B	XHHIKHVPBSQUIJ-VKJZCYHPSA-N	71728348	CC1=CC(=C)C2[C@H]3C1[C@@]2(CCCC3(C)C)C	1.4e-07	1.5	71728348	42	6.586	Sesquiterpenes
(2b3b)-Dihydroxy-30-nor-1220(29)-oleanadiene-28-glucopyranosyloxy-23-oic acid 3-glucuronide	UDJQXYVUQBGNDM-UHFFFAOYNA-N	76401286	CC12CCC3C(C1CC=C4C2(CCC5(C4CC(=C)CC5)C(=O)OC6C(C(C(C(O6)CO)O)O)O)C)(CC(C(C3(C)C(=O)O)OC7C(C(C(C(O7)C(=O)O)O)O)O)O)C	0.0003	1.2	76401286	26	2.592	Saponins	L
Isothalicrine	IJVBJQZGTABEMP-RFTMCNCJNA-N	15907629	CN1CCC2=CC(=C(C=C2[C@@H]1CC3=CC(=C(C=C3)OC)O)OC4=C(C(=C(C(=C4)C[C@H]5C6=CC(=C(C(=C6CCN5C)OC)OC)OC)OC)OC)OC)OC	1e-08	0.56	15907629	8	4.034	Benzylisoquinolines	N
Quivisianthone	ZNCUKAYDXAEZCT-MUMFWNDXNA-N	101338376	C/C=C(/C)\C(=O)O[C@@H]1[C@@H]([C@@H]2[C@@]([C@@H]3[C@@]1(C4=CC(=O)[C@H]([C@@]4(CC3)C)C5=COC=C5)C)([C@H](CC(=O)OC2(C)C)OC(=O)C)C)O	0.0045	7.8	101338376	12	3.201	Limonins	w
Capsoside A	WMXPZMBCAXYUAO-AWNIVKPZNA-N	131752216	CCCCCCCCCCCC(=O)OCC(COC1C(C(C(C(O1)COC2C(C(C(C(O2)CO)O)O)O)O)O)O)OC(=O)C/C=C/CC	2.5e-07	1.4	131752216	99	3.962	Glycolipids
Avicennamine	HWNLAGBDXKGMAH-KNIGOARZNA-N	11799812	C[C@]1(C[C@@H]([C@@H]2[C@H]1[C@H](C2(C)C)C3=C(C=CC(=C3)CCN(C)C)OC)C4=C(C=CC(=C4)CCN(C)C)OC)O	2.4e-06	1.2	11799812	8	3.222		N
1214-Dihydroxyphytol	JMZZBVNSDNHLIV-ZFERPUGGNA-N	101938879	C[C@H](CCC[C@H](C)C(CC(C(C)C)O)O)CCC/C(=C/CO)/C	8.7e-06	1.5	101938879	67	4.99	OH-FA_20_0_1
13-Dimethyluracil	JSDBKAHWADVXFU-UHFFFAOYSA-N	70122	CN1C=CC(=O)N(C1=O)C	4.5e-07	1.6	70122	112	-0.591		p
Euphornin	BRVXVMOWTHQKHC-LVYIKVSWNA-N	6440619	C[C@H]1C[C@]2([C@H]([C@H]1OC(=O)C3=CC=CC=C3)/C=C(\[C@@H](C[C@H](C(/C=C\[C@@H]([C@@H]2OC(=O)C)C)(C)C)OC(=O)C)OC(=O)C)/C)O	0.0041	8.8	6440619	28	4.065	Diterpenes	D
Sclareol	XVULBTBTFGYVRC-UHFFFAOYNA-N	163263	C[C@]12CCCC([C@@H]1CC[C@@]([C@@H]2CC[C@](C)(C=C)O)(C)O)(C)C	7e-06	1.3	163263	17	5.989	Diterpenes
Cytochalasin Ppho	AVASIWUXPVFFGK-WISUYLHINA-N	13892289	C[C@H]1C/C=C/[C@H]2[C@@H]([C@@]([C@H]([C@@H]3[C@@]2([C@@H](/C=C/[C@](C1)(C)O)OC(=O)C)C(=O)N[C@H]3CC4=CC=CC=C4)C)(C)O)O	2.1e-05	1.1	13892289	66	3.326		f
(+)-Norushinsunine N-oxide	PQQSHMZUVWGXSV-UHFFFAOYNA-N	13891870	C[N+]1(CCC2=CC3=C(C4=C2C1C(C5=CC=CC=C54)O)OCO3)[O-]	0.0033	47	13891870	8	0.392	Alkaloids	N
Grahamine D (rel)-	BAWQSJNAIYVRIL-LFTRDUGVNA-N	70698119	C/C=C(/C)\C(=O)O[C@@H]1C[C@@H]2C[C@@H](C[C@H]1N2C)OC(=O)C3C(C(C3(C)C(=O)O[C@@H]4C[C@@H]5C[C@H](C[C@H]4N5C)O)C(=O)O[C@@H]6C[C@@H]7C[C@H](C[C@H]6N7C)O)C8=CC=CC=C8	2.4e-07	1.4	70698119	103	2.722		U
Broussonetine S	RLBPSCXQOMYGEN-SXZAJXFZNA-N	10832551	C(CCCC[C@H]([C@@H]1[C@H]([C@@H]([C@H](N1)CO)O)O)O)CCC[C@@H](CCCO)O	9e-08	0.48	10832551	44	2.151	Pyrrolidines
Bacopaside III	JZAZJIXVJNAOQD-XQCKADIZNA-N	15922618	CC(=C[C@@H]1CO[C@]23C[C@]4(CO2)[C@@H]([C@H]3[C@@]1(C)O)CC[C@H]5[C@]4(CC[C@@H]6[C@@]5(CC[C@@H](C6(C)C)O[C@H]7[C@@H]([C@H]([C@H](CO7)O)O[C@H]8[C@@H]([C@H]([C@@H]([C@H](O8)COS(=O)(=O)O)O)O)O)O)C)C)C	0.00029	1.1	15922618	7	2.753	Triterpenes	Q
PS(22:2(13Z16Z)22:6(4Z7Z10Z13Z16Z19Z))	AAEHIVYIVPNEDF-MKJHNSTASA-N	52925896	CCCCC/C=C\C/C=C\CCCCCCCCCCCC(=O)OC[C@H](COP(=O)(O)OC[C@@H](C(=O)O)N)OC(=O)CC/C=C\C/C=C\C/C=C\C/C=C\C/C=C\C/C=C\CC	1e-06	2.7	52925896	3	14.567	Phosphatidylserines
Leukotriene D4	YEESKJGWJFYOOK-LDDGIIIKSA-N	5280878	CCCCC/C=C\C/C=C\C=C\C=C\[C@H]([C@H](CCCC(=O)O)O)SC[C@@H](C(=O)NCC(=O)O)N	3.4e-06	1.3	5280878	46	2.228	SRS-A
anhydroretinol	FWNRILWHNGFAIN-OYUWDNMLSA-N	5287678	CC\1=CCCC(/C1=C\C=C(/C)\C=C\C=C(/C)\C=C)(C)C	0.0023	5.7	5287678	42	7.759	Carotenoids
Aselacin B	YUBIUAUSTIXPQN-UHFFFAOYNA-N	9811589	C[C@@H]1[C@@H](C(=O)NCCC(=O)N[C@@H](C(=O)N[C@@H](C(=O)NCC(=O)O1)CO)CC2=CNC3=CC=CC=C32)NC(=O)[C@@H](CCC(=O)N)NC(=O)CCCCCCCC(=O)/C=C/C=C/CCCC(C)O	0.0064	1	9811589	100	2.214	Indoles
PG(18:2(9Z12Z)13:0)	LEQIXGBEZBNXGA-SJZURPHPNA-N	52926606	CCCCCCCCCCCCC(=O)O[C@H](COC(=O)CCCCCCC/C=C\C/C=C\CCCCC)COP(=O)(O)OC[C@H](CO)O	0.0034	6.3	52926606	5	11.397	Phosphatidylglycerols
3-(81114-Pentadecatrienyl)phenol	JOLVYUIAMRUBRK-AOSYACOCSA-N	5356112	C=CC/C=C/C/C=C/CCCCCCCC1=CC(=CC=C1)O	0.0054	7.7	5356112	15	8.179	Phenols
Diacarnoxide B	VCZNGUOXJKTDBG-ZXULBAAINA-N	16104922	C[C@@H]([C@H]1CC[C@](OO1)(C)CCCC(C)CCC2C(=C)CCCC2(C)C)C(=O)O	0.0049	7.7	16104922	19	8.255	Peroxides
Belladonnine	GERIGMSHTUAXSI-VSFMPYMYNA-N	442995	CN1C2CCC1CC(C2)OC(=O)[C@H]3CC[C@@](C4=CC=CC=C34)(C5=CC=CC=C5)C(=O)OC6CC7CCC(C6)N7C	0.0069	5.9	442995	103	5.073	Solanaceous Alkaloids	U
PIM4(18:014:0)	KPSAUYDRFVIHER-DFYVJYBZNA-N	126457526	CCCCCCCCCCCCCCCCCC(=O)OC[C@H](COP(=O)(O)O[C@H]1[C@@H](C([C@@H](C(C1O[C@H]2[C@H](C([C@H](C(O2)CO[C@H]3[C@H](C([C@H](C(O3)CO[C@H]4[C@H](C([C@H](C(O4)CO)O)O)O)O)O)O)O)O)O)O)O)O)O[C@@H]5[C@@H](C([C@@H](C(O5)CO)O)O)O)OC(=O)CCCCCCCCCCCCC	0.0022	5.5	126457526	51	6.225		P
Lyciumoside IV	OEOWMDSFDQHCFJ-IDGBGVIZNA-N	71296134	C[C@H]1[C@@H]([C@H]([C@H]([C@@H](O1)O[C@@H]2[C@H](O[C@H]([C@@H]([C@H]2O)O)O[C@@](C)(CC/C=C(\C)/CC/C=C(\C)/CC/C=C(/C)\CO[C@H]3[C@@H]([C@H]([C@@H]([C@H](O3)CO)O)O)O)C=C)CO)O)O)O	1.7e-05	1.2	71296134	52	0.752	Glycolipids
Bismurrayafoline E	OUSUKIXJVMBEMB-YAGSLNJISA-N	101150699	CC1=CC2=C(NC3=C2C=CC(=C3C/C=C(/CCC=C(C)C)\C)OC)C(=C1O)C4=C(C(=CC5=C4NC6=C5C=CC(=C6C/C=C(/CCC=C(C)C)\C)OC)C)O	0.005	8.2	101150699	39	10.534	Indoles	h
p-Menthane-38-diol	LMXFTMYMHGYJEI-UHFFFAOYNA-N	556998	CC1CCC(C(C1)O)C(C)(C)O	1.9e-05	1.4	556998	68	2.308	Plant Extracts	o
(S)-9-Hydroxy-10-undecenoic acid	CJUFNYIRKDOQMC-UHFFFAOYNA-N	73242170	C=C[C@H](CCCCCCCC(=O)O)O	4.7e-06	1.4	73242170	87	2.54	OH-FA_11_1_1	j
Melissoidesin D	DTXLHTNLCVLTBV-WKVJHDRJNA-N	102121392	CCOC[C@@H]1[C@@H]2C[C@@H]([C@H]3[C@@]4([C@H](C[C@@H](C([C@H]4[C@H]([C@@H]([C@]3(C2)C1=O)O)OC(=O)C)(C)C)OC(=O)C)O)C)O	0.00015	1.2	102121392	60	0.323	Glycosides
Steviobioside	OMHUCGDTACNQEX-UHFFFAOYNA-N	314523	CC12CCCC(C1CCC34C2CCC(C3)(C(=C)C4)OC5C(C(C(C(O5)CO)O)O)OC6C(C(C(C(O6)CO)O)O)O)(C)C(=O)O	0.0024	1.2	314523	55	1.349	Diterpenes, Kaurane	F
Bryostatin 20	CYISYNAHSIYBII-HHTQQHJZNA-N	138319197	C[C@@H]([C@H]1C[C@@H]2[C@@H]3C(=CC(=O)O3)C[C@@](O2)(C(/C=C/[C@H]4C/C(=C\C(=O)OC)/C[C@H](O4)C[C@]5(C([C@H](C[C@H](O5)C[C@H](CC(=O)O1)O)OC(=O)C(C)(C)C)(C)C)O)(C)C)O)O	2e-05	1.2	138319197	38	1.487	Macrolides	S
PIM4(18:1(9Z)14:0)	MENRSQMXLZVPNJ-BTMGXHLSNA-N	126457532	CCCCCCCCCCCCCC(=O)O[C@H](COC(=O)CCCCCCC/C=C\CCCCCCCC)COP(=O)(O)O[C@H]1[C@@H](C([C@@H](C(C1O[C@H]2[C@H](C([C@H](C(O2)CO[C@H]3[C@H](C([C@H](C(O3)CO[C@H]4[C@H](C([C@H](C(O4)CO)O)O)O)O)O)O)O)O)O)O)O)O)O[C@@H]5[C@@H](C([C@@H](C(O5)CO)O)O)O	1.6e-06	1.4	126457532	51	5.709	Phosphatidylinositols	P
Namonin E	JNGDBBPABQCYEV-YAVKXCRYNA-N	10964186	C[C@H]1[C@@H]([C@H]([C@H]([C@@H](O1)O[C@@H]2[C@H]([C@H](CO[C@H]2O[C@@H]3C[C@@H](CC4=CC[C@@H]5[C@@H]([C@@]34C)CC[C@]6([C@H]5C[C@H]7[C@@H]6C(=C(O7)CC[C@@H](C)CO[C@H]8[C@@H]([C@H]([C@@H]([C@H](O8)CO)O)O)O)C)C)O)OC(=O)C)O[C@H]9[C@@H]([C@H]([C@@H](CO9)O)O)O)O)O)O	7e-07	1.2	10964186	7	0.029	Saponins	Q
Karatavigenin B	HBGXWELPRPGLBB-DYMIFXPONA-N	52931437	C[C@@H]1CC[C@@]2([C@H]([C@H]3[C@@H](O2)C[C@@H]4[C@@]3(CC[C@H]5[C@H]4C[C@H]([C@@]6([C@@]5(C[C@H]([C@@H](C6)O)OC(=O)C7=CC=CC=C7)C)O)O)C)C)OC1	0.00033	1.6	52931437	28	5.301	Diterpenes	D
Virescenoside R	QLNIKMOZYWMKSZ-GVKXSJNZNA-N	102333442	C[C@@]1(CC[C@H]2C(=CC[C@@H]3[C@@]2(C[C@H]([C@@H]([C@]3(C)CO[C@H]4[C@H]([C@@H]([C@@H]([C@H](O4)CO[C@H]5[C@@H]([C@H]([C@@H]([C@H](O5)CO)O)O)O)O)O)O)O)O)C)C1)C=C	4.6e-06	1.2	102333442	11	1.714	Saponins
Cladionol A	GRDLKOZEWJLCMH-MOFZLMBUNA-N	11445870	CCC(C)CC(C)CC(C)C(C(C)/C=C(\C)/C(C(C)/C=C(\C)/C(C(C)/C=C(\C)/C(C(C)C(=O)OC[C@H]([C@@H]([C@@H](CO)O)O)O)O)O)O)O[C@H]1[C@H]([C@H]([C@@H]([C@H](O1)COC(=O)C)O)O)O	1.2e-06	1.7	11445870	99	1.997	Macrolides
Withanoside III	RRWWSMHWDKRGQC-SNBSLISYNA-N	101168810	CC1=C(C(=O)O[C@H](C1)[C@@H](C)[C@H]2CC[C@@H]3[C@@]2(CC[C@H]4[C@H]3[C@H]5[C@H](O5)[C@@]6([C@@]4([C@H](C[C@@H](C6)O[C@H]7[C@@H]([C@H]([C@@H]([C@H](O7)CO)O)O)O)O)C)O)C)CO	6.2e-07	1.3	101168810	32	2.093	Withanolides
Sansevistatin 1	DFNXUPWTNVNPER-GQUTYCHTNA-N	11263018	C[C@H]1[C@H]2[C@H](C[C@@H]3[C@@]2(CC[C@H]4[C@H]3CC=C5[C@@]4(CC[C@@H](C5)O[C@H]6[C@@H]([C@H]([C@@H]([C@H](O6)CO)O[C@H]7[C@@H]([C@@H]([C@H]([C@@H](O7)C)O)O)O)O)O[C@H]8[C@@H]([C@@H]([C@H]([C@@H](O8)C)O)O)O)C)C)O[C@]19CCC(=C)CO9	3.4e-06	1.4	11263018	7	2.119	Spirostans	Q
PE(20:5(5Z8Z11Z14Z17Z)14:0)	OQWZPIYVNUSNLG-KQKHHBPSSA-N	52924665	CCCCCCCCCCCCCC(=O)O[C@H](COC(=O)CCC/C=C\C/C=C\C/C=C\C/C=C\C/C=C\CC)COP(=O)(O)OCCN	0.0034	13	52924665	14	12.728	Phosphatidylethanolamines
Funingenoside A	UTLCYLWFMDQSCF-MCKLOLJSNA-N	101254625	C[C@H]1[C@@H]([C@@H](C[C@@H](O1)O[C@H]2CC[C@]3([C@H]([C@H]2COC(=O)C)CC[C@]45[C@H]3CC[C@@](C4=O)([C@H](CC5)CC6=CC(=O)OC6)C)C)OC)O[C@H]7[C@@H]([C@H]([C@@H]([C@H](O7)CO[C@H]8[C@@H]([C@H]([C@@H]([C@H](O8)CO)O)O)O)O)O)O	0.0041	5.6	101254625	57	0.977	Saponins
PI(O-16:018:1(9Z))	QXAIBJDDPUXXJM-CXBQSTIKNA-N	52928507	CCCCCCCCCCCCCCCCOC[C@H](COP(=O)(O)OC1C([C@@H](C(C(C1O)O)O)O)O)OC(=O)CCCCCCC/C=C\CCCCCCCC	0.0046	6.4	52928507	24	13.302	Phosphatidylinositols
epoxomicin	DOGIDQKFVLKMLQ-FOIHFKJPNA-N	11226684	CC[C@H](C)[C@@H](C(=O)N[C@@H]([C@@H](C)O)C(=O)N[C@@H](CC(C)C)C(=O)[C@]1(CO1)C)NC(=O)[C@H]([C@@H](C)CC)N(C)C(=O)C	0.031	1.7	11226684	71	1.815	Oligopeptides	d
Flutriafol	QPYZUFUUNHUIIL-OAHLLOKOSA-N	91727	C1=CC=C(C(=C1)C(CN2C=NC=N2)(C3=CC=C(C=C3)F)O)F	0.0038	5.4	91727	74	0.348	Triazoles
Leptofuranin C	WEMVPZVMDSGXDU-YGIRKTDUNA-N	9827697	CC1CC(OC1C(C)C(=O)C(C)/C=C(\C)/C=C/CC(C)/C=C(/C)\C=C\C2C(C=CC(=O)O2)C)(C)CC=O	4.4e-05	1.2	9827697	106	6.876	Pyrones	A
Methyl jasmonate	GEWDNTWNSAZUDX-WQMVXFAESA-N	5281929	CC/C=C\C[C@@H]1[C@H](CCC1=O)CC(=O)OC	1.5e-05	0.19	5281929	108	2.139	Cyclopentanes	I
PC(22:5(7Z10Z13Z16Z19Z)22:6(4Z7Z10Z13Z16Z19Z))	LIYXTHCSSCAYRI-VYKHTVRDSA-N	53479393	CC/C=C\C/C=C\C/C=C\C/C=C\C/C=C\CCCCCC(=O)OC[C@H](COP(=O)([O-])OCC[N+](C)(C)C)OC(=O)CC/C=C\C/C=C\C/C=C\C/C=C\C/C=C\C/C=C\CC	0.003	1.2	53479393	81	16.705	Phosphatidylcholines
4-Coumaryl alcohol	PTNLHDGQWUGONS-OWOJBTEDSA-N	5280535	C1=CC(=CC=C1/C=C/CO)O	3.1e-06	1.4	5280535	15	0.655	Phenols
PGP(16:020:3(8Z11Z14Z))	OFOWZJMRNRECQR-WQQWEMLQSA-N	53481801	CCCCCCCCCCCCCCCC(=O)OC[C@H](COP(=O)(O)OC[C@H](COP(=O)(O)O)O)OC(=O)CCCCCC/C=C\C/C=C\C/C=C\CCCCC	0.00041	1.2	53481801	76	12.686	Phosphatidylethanolamines
3beta-(beta-D-glucopyranosyl)oxy-17alpha-hydroxy-16beta-(O-(2-O-345-trimethoxybenzoyl-beta-D-xylopyranosyl)-(1->3)-2-O-acetyl-alpha-L-arabinopyranosyl)oxycholest-5-en-22-one	FLAULGUSZSPUPV-FDKPUIKUSA-N	70697763	C[C@@H](C(=O)CCC(C)C)[C@]1([C@H](C[C@@H]2[C@@]1(CC[C@H]3[C@H]2CC=C4[C@@]3(CC[C@@H](C4)O[C@H]5[C@@H]([C@H]([C@@H]([C@H](O5)CO)O)O)O)C)C)O[C@H]6[C@@H]([C@H]([C@H](CO6)O)O[C@H]7[C@@H]([C@H]([C@@H](CO7)O)O)OC(=O)C8=CC(=C(C(=C8)OC)OC)OC)OC(=O)C)O	0.00086	1.3	70697763	12	3.536	Saponins	w
Lovastatin hydroxy acid observed in lovastatin standard	CPXUZWJJNBFVEE-WAKBTOJMNA-N	64727	CC[C@H](C)C(=O)O[C@H]1C[C@H](C=C2[C@H]1[C@H]([C@H](C=C2)C)CC[C@H](C[C@H](CC(=O)O)O)O)C	0.0022	10	64727	98	3.754	Cholic Acids
PG(14:1(9Z)15:1(9Z))	BAWDIQRVSWNRPE-UNJOEJKZNA-N	52926378	CCCCC/C=C\CCCCCCCC(=O)O[C@H](COC(=O)CCCCCCC/C=C\CCCC)COP(=O)(O)OC[C@H](CO)O	0.0045	1.1	52926378	5	10.07	Phosphatidylglycerols
Gerronemin E	GRNMSFHYESOOJH-QGXVWARISA-N	5317578	C1=CC(=C(C(=C1)O)O)CCCCCCC/C=C\C/C=C\CCC2=C(C(=CC=C2)O)O	0.0054	7.5	5317578	91	7.963	Catechols	V
Mesobilirubinogen	OBHRVMZSZIDDEK-UHFFFAOYNA-N	26818	CCC1=C(C(=O)NC1CC2=C(C(=C(N2)CC3=C(C(=C(N3)CC4C(=C(C(=O)N4)CC)C)C)CCC(=O)O)CCC(=O)O)C)C	0.005	6.9	26818	22	1.319	Bile Pigments
PA(18:3(9Z12Z15Z)18:0)	XRZJERJYZPMSBZ-SMTKHEEVSA-N	52928998	CCCCCCCCCCCCCCCCCC(=O)O[C@H](COC(=O)CCCCCCC/C=C\C/C=C\C/C=C\CC)COP(=O)(O)O	0.005	7.6	52928998	2	14.777	Phosphatidic Acids	M
Digonazole	UTUBLIPCJHOMFB-UHFFFAOYNA-N	23427998	CCCCCCCCCCCCCCCCCCCCC(=O)O[C@H](C[C@@H]([C@@H]([C@H](C)O)O)O)C1=COC(=N1)CC2=CN=CO2	9.4e-05	1.1	23427998	72	9.073		K
Daedaleaside D	RSBAXXTZWHYISF-OQWXSBENNA-N	11239378	CC(C)C(=C)CC[C@H]([C@H]1[C@@H](C[C@@]2([C@@]1(CCC3=C2CC[C@@H]4[C@@]3(CCC(=O)C4(C)C)C)C)C)OC(=O)C)C(=O)O[C@H]5[C@@H]([C@H]([C@@H]([C@H](O5)CO)O)O)O	0.0028	7.6	11239378	32	5.518	Glucosides
5-Androstene-3b16b17a-triol	GUGSXATYPSGVAY-SMHIETRTNA-N	21252251	C[C@]12CC[C@@H](CC1=CC[C@@H]3[C@@H]2CC[C@]4([C@H]3C[C@@H]([C@H]4O)O)C)O	2.4e-05	0.54	21252251	90	3.041	Dehydrocholesterols
Blumenol B	CWOFGGNDZOPNFG-RLQDDWLSNA-N	14135402	CC1=CC(=O)CC([C@]1(CC[C@@H](C)O)O)(C)C	0.002	2.5	14135402	20	0.528	Cyclohexanes	x
Capric acid	GHVNFZFCNZKVNT-UHFFFAOYSA-N	2969	CCCCCCCCCC(=O)O	0.0057	5.6	2969	49	4.156	Saturated FA
alpha-Corocalene	VTUZIFHLLUSULC-UHFFFAOYSA-N	5316074	CC1=CC2=C(C=CC(=C2CC1)C)C(C)C	0.0053	5.2	5316074	56	5.117	Xylenes	z
PI(O-18:016:1(9Z))	CSXYLBJXZWGCHI-KKUWFWSHNA-N	52928487	CCCCCCCCCCCCCCCCCCOC[C@H](COP(=O)(O)OC1C([C@@H](C(C(C1O)O)O)O)O)OC(=O)CCCCCCC/C=C\CCCCCC	0.005	5.4	52928487	24	13.302	Phosphatidylinositols
Cussoracoside F	VYFWQMKVBRGECE-BBBGBDLHNA-N	102303560	C[C@@]12CC[C@@H]([C@]([C@H]1CC[C@]34[C@H]2CC[C@H](C3)C(=C)C4)(C)C(=O)O[C@H]5[C@@H]([C@H]([C@@H]([C@H](O5)CO[C@H]6[C@@H]([C@](CO6)(CO)O)O)O)O)O)O	3.4e-06	0.33	102303560	55	2.963	Triterpenes	F
Momordicoside G	MQGABSJZVJOSCX-OQLLNIDSNA-N	91895422	C[C@H](C/C=C/C(C)(C)OC)[C@H]1CC[C@@]2([C@@]1(CC[C@]34[C@H]2C=C[C@]5([C@H]3CC[C@@H](C5(C)C)O[C@H]6[C@@H]([C@@H]([C@@H]([C@H](O6)CO)O)O)O)OC4)C)C	0.0031	1.1	91895422	11	6.908	Glycosides
beta-Thujaplicin	FUWUEFKEXZQKKA-UHFFFAOYSA-N	3611	CC(C)C1=CC(=O)C(=CC=C1)O	1.4e-05	1.3	3611	33	2.349	Monoterpenes
Cyprodinil	OTXANOLOOUNVSR-UHFFFAOYSA-N	86367	CC1=CC(=NC(=N1)NC2=CC=CC=C2)C3CC3	0.00012	1.5	86367	74	1.064	Pyrimidines
Chrymutasin A	JRLWNUGRLOAQEN-OXIKRAQONA-N	135466899	C[C@@H]1[C@@H]([C@@H]([C@H]([C@@H](O1)OC2=CC=CC3=C2C4=C5C6=C(C=CC(=C6C(=O)O4)C)C(=O)C(=N)C5=C3O)O[C@@H]7[C@@H]([C@H]([C@H]([C@H](O7)C)O)OC)O)O)O	3.7e-07	1.7	135466899	1	-0.54	Benzopyrans	s
PA(19:1(9Z)17:2(9Z12Z))	LTZBUUBMMMLULI-XNUCCUOYNA-N	52929081	CCCCCCCCC/C=C\CCCCCCCC(=O)OC[C@H](COP(=O)(O)O)OC(=O)CCCCCCC/C=C\C/C=C\CCCC	0.0051	5.9	52929081	2	14.588	Phosphatidic Acids	M
Tetrahydrocorticosterone	RHQQHZQUAMFINJ-DSCSGEDNSA-N	65553	C[C@]12CC[C@H](C[C@H]1CC[C@@H]3[C@@H]2[C@H](C[C@]4([C@H]3CC[C@@H]4C(=O)CO)C)O)O	2.9e-06	0.56	65553	10	2.976	11-Hydroxycorticosteroids	B
Rhodopin glucoside	WEELHWARVOLEJX-WPLVGOEFNA-N	447386	CC(=CCC/C(=C/C=C/C(=C/C=C/C(=C/C=C/C=C(\C)/C=C/C=C(\C)/C=C/C=C(\C)/CCCC(C)(C)O[C@H]1[C@@H]([C@H]([C@@H]([C@H](O1)CO)O)O)O)/C)/C)/C)C	0.005	7.2	447386	52	12.37	Epoxy FA_46
PI(P-18:020:2(11Z14Z))	VNORBODRQREIMG-BKEHJXRINA-N	52928556	CCCCCCCCCCCCCCCC/C=C\OC[C@H](COP(=O)(O)OC1C([C@@H](C(C(C1O)O)O)O)O)OC(=O)CCCCCCCCC/C=C\C/C=C\CCCCC	0.0048	6.9	52928556	24	15.482	Phosphatidylinositols
PG(21:017:0)	BDCQSBKXGUEMPI-WMQSFMSKNA-N	52926947	CCCCCCCCCCCCCCCCCCCCC(=O)OC[C@H](COP(=O)(O)OC[C@H](CO)O)OC(=O)CCCCCCCCCCCCCCCC	0.0046	7.2	52926947	77	16.223	Phosphatidylglycerols	W
Spinosyn A	SRJQTHAZUNRMPR-SBOQKJDQNA-N	443059	CC[C@H]1CCC[C@@H]([C@H](C(=O)C2=C[C@H]3[C@@H]4C[C@@H](C[C@H]4C=C[C@H]3[C@@H]2CC(=O)O1)O[C@H]5[C@@H]([C@@H]([C@H]([C@@H](O5)C)OC)OC)OC)C)O[C@H]6CC[C@@H]([C@H](O6)C)N(C)C	0.0031	7.1	443059	73	4.161	Macrolides
Ritterazine E	CAXQCKNMQDGMFL-UHFFFAOYNA-N	10463532	C[C@H]1C[C@@]2([C@H]([C@H]3[C@@H](O2)C[C@]4([C@@]3(C)O)[C@@H]5CC[C@H]6CC7=C(C[C@@]6([C@H]5CC4=O)C)N=C8C[C@@H]9C[C@@H]([C@@H]2[C@@H]([C@]9(CC8=N7)C)C[C@H]([C@]3(C2=C[C@H]2[C@@]3([C@@H]([C@]3(O2)CC[C@](CO3)(C)O)C)O)C)O)O)C)OC1(C)C	0.0045	9.5	10463532	36	3.407	Hydrocarbons, Cyclic	k
PG(18:4(6Z9Z12Z15Z)20:5(5Z8Z11Z14Z17Z))	FMCKRYLEGOKPJI-IGGKTRHTNA-N	52926714	CC/C=C\C/C=C\C/C=C\C/C=C\CCCCC(=O)OC[C@H](COP(=O)(O)OC[C@H](CO)O)OC(=O)CCC/C=C\C/C=C\C/C=C\C/C=C\C/C=C\CC	0.007	3.8	52926714	84	12.902	Glycerides
Hericenone G	GGXBOOLRGQUWIV-UHFFFAOYNA-N	10348545	CCCCCCCCCCCCCCCCCC(=O)OCC1=CC(=C2CCC(OC2=C1C=O)(C)CC(=O)C=C(C)C)OC	0.00014	1.2	10348545	35	10.875	Phenols
3b-Allotetrahydrocortisol	AODPIQQILQLWGS-VSJLKEFSSA-N	12444612	C[C@]12CC[C@@H](C[C@@H]1CC[C@@H]3[C@@H]2[C@H](C[C@]4([C@H]3CC[C@@]4(C(=O)CO)O)C)O)O	0.016	0.66	12444612	10	1.825	11-Hydroxycorticosteroids	B
Hyalodendroside B	CXHPXRHMWVTPLG-OWDRZVOJNA-N	101006907	CC(C)[C@H]1CC(=O)C2=C3CC[C@H]4[C@]([C@@]3(CC[C@]12C)C)(CC[C@@H]5[C@@]4(C[C@H]([C@@H](C5(C)C)O[C@H]6[C@@H]([C@H]([C@@H]([C@H](O6)CO)O)O)O)OC(=O)C)CO)C	0.0041	29	101006907	32	5.567	Triterpenes
DHBOA-Glc	VUFDXOACUHDTLI-UHFFFAOYNA-N	592555	C1=CC2=C(C=C1O)OC(C(=O)N2)OC3C(C(C(C(O3)CO)O)O)O	0.0023	5.5	592555	111	-1.561		t
Azoxystrobin	TVJHJRXOIAMNSY-YADHBBJMSA-N	3034285	CO/C=C(\C1=CC=CC=C1OC2=NC=NC(=C2)OC3=CC=CC=C3C#N)/C(=O)OC	0.0025	6	3034285	45	1.444	Methacrylates
Corchoionol C 9-glucoside	SWYRVCGNMNAFEK-AATRIKPKNA-N	13857517	CC1=CC(=O)CC(C1(/C=C/C(C)OC2C(C(C(C(O2)CO)O)O)O)O)(C)C	0.0044	4.6	13857517	41	-0.464	Glucosides
Atratoglaucoside A	FMBUMRDTMFABLR-AJYUZISRNA-N	101109728	C[C@H]1[C@@H]([C@H](C[C@@H](O1)O[C@@H]2[C@H](O[C@H]([C@@H]([C@H]2OC)O)O[C@H]3CC[C@@]4(C5CCC6=CO[C@@]7(C6C(CO7)OC(=O)C5CC=C4C3)C)C)C)O)O	0.01	1.4	101109728	57	1.235	Steroids
Gibbilimbol B	RQVUFITWWLNDGP-BQYQJAHWSA-N	10014185	CCCCCC/C=C/CCC1=CC=C(C=C1)O	0.0041	4.2	10014185	15	5.838	Phenols
Annosquamosin G	BPTFMXPYKVCKDB-ULONZFNLNA-N	11034695	C[C@@]12CCC[C@]([C@H]1CC[C@]34[C@H]2CC[C@H](C3)[C@@](C4)(CO)O)(C)OO	0.0054	4.4	11034695	10	3.582	Diterpenes	B
C17 sphingosine(1+)	RBEJCQPPFCKTRZ-LHMZYYNSSA-O	71581052	CCCCCCCCCCCC/C=C/[C@H]([C@H](CO)[NH3+])O	0.0061	6.7	71581052	25	5.983	Ethanolamines
(3beta22E)-2627-Dinorergosta-522-dien-3-ol	BKWBRNDZAJHCMT-SREVYHEPNA-N	131750920	CC(C)/C=C\C(C)C1CCC2C1(CCC3C2CC=C4C3(CCC(C4)O)C)C	0.00024	1.7	131750920	90	9.425	Dehydrocholesterols
PA(P-16:0e18:2(9Z12Z))	OLCTYLMZTXKGKH-BBNWHMLASA-N	52929743	CCCCCCCCCCCCCC/C=C\OC[C@H](COP(=O)(O)O)OC(=O)CCCCCCC/C=C\C/C=C\CCCCC	0.0034	6.5	52929743	2	14.504	Lysophospholipids	M
Gibbilimbol A	LMJPVRXXPPOFAM-VOTSOKGWSA-N	10263365	CCCCC/C=C/CCCC1=CC=C(C=C1)O	0.0051	4.9	10263365	15	5.838	Phenols
Phomopsichalasin	AEKBQYOSHUYACR-HUBYWGRONA-N	139583786	C[C@H]1CC[C@H]2[C@H]3[C@@H](C(=C[C@@]2(C1)C)C)[C@]4(C=C([C@H]([C@@H]5[C@]4(C3=O)C(=O)N[C@]5(CC6=CC=C(C=C6)O)O)C)C)C	0.0043	4.4	139583786	110	5.096	Cytochalasins	T
Lauroyl diethanolamide	AOMUHOFOVNGZAN-UHFFFAOYSA-N	8430	CCCCCCCCCCCC(=O)N(CCO)CCO	0.045	8.3	8430	104	3.808	Ethanolamines
(S)-8-Gingerol	BCIWKKMTBRYQJU-UHFFFAOYNA-N	5275725	CCCCCCCC(CC(=O)CCC1=CC(=C(C=C1)O)OC)O	0.016	0.59	5275725	61	3.575	Catechols
Spinasaponin A	BQPYEFAVIPEQIK-UHFFFAOYNA-N	441951	C[C@]12CC[C@@H](C([C@@H]1CC[C@@]3([C@@H]2CC=C4[C@]3(CC[C@@]5([C@H]4CC(CC5)(C)C)C(=O)O)C)C)(C)C)O[C@H]6[C@@H]([C@H]([C@@H]([C@H](O6)C(=O)O)O)O[C@H]7[C@@H]([C@H]([C@@H]([C@H](O7)CO)O)O)O)O	0.028	2	441951	26	6.135	Saponins	L
33'44'-Tetrahydroxy-55'-diisopropyl-22'-dimethylbiphenyl	BUKCOURGDZTOBF-UHFFFAOYSA-N	642531	CC1=C(C(=C(C=C1C2=CC(=C(C(=C2C)O)O)C(C)C)C(C)C)O)O	0.0037	0.74	642531	91	4.58	Catechols	V
Longithorol E	PHULLDGGFWVHPH-WNVBHWFWNA-N	100942100	C/C/1=C\CCC2(C=CC3=C(O2)C=C(C/C(=C/CC1)/C)C(=C3)O)C	0.005	3.9	100942100	96	4.608	Benzopyrans	R
Gypsogenin 3-O-rhamnosylglucuronide	OLFGQBKWRYLUAQ-DEYGWBDUNA-N	441927	C[C@H]1[C@@H]([C@H]([C@H]([C@@H](O1)O[C@H]2[C@@H]([C@H](O[C@H]([C@@H]2O)O[C@H]3CC[C@]4([C@H]([C@]3(C)C=O)CC[C@@]5([C@@H]4CC=C6[C@]5(CC[C@@]7([C@H]6CC(CC7)(C)C)C(=O)O)C)C)C)C(=O)O)O)O)O)O	0.0017	0.06	441927	26	5.813	Saponins	L
PE(15:020:1(11Z))	DAZYZDVAACSMFA-DYFSFZQGSA-N	52924167	CCCCCCCCCCCCCCC(=O)OC[C@H](COP(=O)(O)OCCN)OC(=O)CCCCCCCCC/C=C\CCCCCCCC	2.9e-05	1.3	52924167	14	14.605	Phosphatidylethanolamines
alpha-D-Xylopyranosyl-(1->6)-beta-D-glucopyranosyl-(1->4)-D-glucose	BSCUNSVAACYEAI-UHFFFAOYNA-N	74428025	C1C(C(C(C(O1)OCC2C(C(C(C(O2)OC3C(OC(C(C3O)O)O)CO)O)O)O)O)O)O	0.0041	0.71	74428025	9	-4.957	Trisaccharides	c
LPE 18:2	SVRBKLJIDJHADS-USWSLJGRSA-N	52925130	CCCCC/C=C\C/C=C\CCCCCCCC(=O)OC[C@H](COP(=O)(O)OCCN)O	0.00027	0.37	52925130	14	5.319	Phosphatidylethanolamines
Munchiwarin	HBTGYTAWTFVIRO-QKOOUZAANA-N	6536697	CC(=CCC1=C/C(=C(\C=C\C2=CC=C(C=C2)O)/O)/C(=O)C(C1=O)(CC=C(C)C)CC=C(C)C)C	1.4e-07	0.08	6536697	33	6.244	Flavonoids
PS(20:4(5Z8Z11Z14Z)22:6(4Z7Z10Z13Z16Z19Z))	KJECAXDORGQZQA-XRQJXPHHSA-N	52926084	CCCCC/C=C\C/C=C\C/C=C\C/C=C\CCCC(=O)OC[C@H](COP(=O)(O)OC[C@@H](C(=O)O)N)OC(=O)CC/C=C\C/C=C\C/C=C\C/C=C\C/C=C\C/C=C\CC	1.7e-05	0.04	52926084	3	12.775	Phosphatidylethanolamines
PS(P-16:021:0)	WTSCSBGIKLYSQE-QIUYIHOHNA-N	52926205	CCCCCCCCCCCCCCCCCCCCC(=O)O[C@H](CO/C=C\CCCCCCCCCCCCCC)COP(=O)(O)OC[C@@H](C(=O)O)N	0.0047	7.1	52926205	78	14.116	Phosphatidylserines
8-Methylsulfinyloctyl glucosinolate	GPMDJOOLATZDQL-YXBJVNSWNA-N	46173880	CS(=O)CCCCCCCCC(=NOS(=O)(=O)O)S[C@H]1[C@@H]([C@H]([C@@H]([C@H](O1)CO)O)O)O	0.0037	5.9	46173880	9	-0.867		c
N-Undecanoylglycine	HEUQYIQQCNOXOG-UHFFFAOYSA-N	454092	CCCCCCCCCCC(=O)NCC(=O)O	0.00018	0.3	454092	104	3.897	Saturated_Fatty Acids
Garcinielliptone FA	MTCPKFHUPWTJSP-ILKCVVHLNA-N	11223975	CC(=CC[C@H](CCC(=C)C)[C@@H](C(=C)C)[C@](C)(CC=C(C)C)C(=O)C1=CC(=CC=C1)O)C	0.0028	2.2	11223975	33	7.811	Benzophenones
Gibberellin A12	UJFQJDAESQJXTG-NIILLQMYNA-N	443450	C[C@@]12CCC[C@@]([C@H]1[C@@H]([C@]34[C@H]2CC[C@H](C3)C(=C)C4)C(=O)O)(C)C(=O)O	0.0014	3.7	443450	19	4.69	Gibberellins
Kurilensoside H	SOVMHZODGWLPJC-ZDVPKGLUNA-N	52931571	C[C@@H](CCC[C@@H](C)[C@H]1[C@H]([C@@H]([C@@H]2[C@@]1(CC[C@H]3[C@]2(C[C@H]([C@@]45[C@@]3(CC[C@@H]([C@@H]4O5)O[C@H]6[C@H](C([C@@H](CO6)O)O)O)C)O)O)C)O)O)CO	0.0032	23	52931571	27	1.706	Steroids
Apo-12'-violaxanthal	CAXVJDRXJFKYQP-RXCALXPUNA-N	131751642	C/C(=C\C=C\C=C(\C)/C=O)/C=C/C=C(/C)\C=C\C12C(CC(CC1(O2)C)O)(C)C	4.4e-06	0.13	131751642	17	5.019	Carotenoids
Indoxacarb	ACPLOCGAXUGQHB-CDSIGGHENA-N	107720	COC(=O)[C@]12CC3=C(C1=NN(CO2)C(=O)N(C4=CC=C(C=C4)OC(F)(F)F)C(=O)OC)C=CC(=C3)Cl	0.00012	1.4	107720	45	3.09	Oxazines
PS(22:2(13Z16Z)22:4(7Z10Z13Z16Z))	QIWDDYCBOBWYHF-XMHWUKAXSA-N	52925895	CCCCC/C=C\C/C=C\CCCCCCCCCCCC(=O)OC[C@H](COP(=O)(O)OC[C@@H](C(=O)O)N)OC(=O)CCCCC/C=C\C/C=C\C/C=C\C/C=C\CCCCC	0.0041	30	52925895	3	15.221	Phosphatidylserines
PC(16:00:0)	ASWBNKHCZGQVJV-HSZRJFAPSA-N	460602	CCCCCCCCCCCCCCCC(=O)OC[C@H](COP(=O)([O-])OCC[N+](C)(C)C)O	0.017	1.6	460602	63	5.462	Lysophospholipids
Ginsenoside C	AGBCLJAHARWNLA-UHFFFAOYNA-N	6917976	CC(=CCC[C@@](C)([C@H]1CC[C@@]2([C@@H]1[C@@H](C[C@H]3[C@]2(CC[C@@H]4[C@@]3(CC[C@@H](C4(C)C)O[C@H]5[C@@H]([C@H]([C@@H]([C@H](O5)CO)O)O)O[C@H]6[C@@H]([C@H]([C@@H]([C@H](O6)CO)O)O)O)C)C)O)C)O[C@H]7[C@@H]([C@H]([C@@H]([C@H](O7)CO[C@H]8[C@@H]([C@H]([C@H](CO8)O)O)O)O)O)O)C	0.00093	9.4	6917976	7	2.916	Triterpenes	Q
Epothilone B10	FBHLXXMDOGRQOQ-NYRRVEJINA-N	10791734	CCC1=NC(=CS1)/C=C(\C)/[C@@H]2C[C@H]3[C@H](O3)CCC[C@@H]([C@@H]([C@H](C(=O)C([C@H](CC(=O)O2)O)(C)C)C)O)C	0.00055	0.47	10791734	72	1.974	Macrolides	K
Heptadecanedioic acid	QCNWZROVPSVEJA-UHFFFAOYSA-N	3083765	C(CCCCCCCC(=O)O)CCCCCCCC(=O)O	0.014	2.7	3083765	49	6.265	Saturated_Fatty Acids
Pregnacetal	KYGPNWVAMZIKIS-JDYIBBLLNA-N	102026325	C[C@H]([C@]1(C(=O)C[C@@H]2[C@@]1(CC[C@H]3[C@H]2CC[C@@H]4[C@@]3(CCC(C4)(OC)OC)C)C)O)O	0.0033	0.08	102026325	10	4.49	11-Hydroxycorticosteroids	B
PC(O-17:00:0)	HQRBTQCLRRUGMR-KSYWNVGFNA-N	10413466	CCCCCCCCCCCCCCCCCOC[C@H](COP(=O)([O-])OCC[N+](C)(C)C)O	3.4e-06	1.9	10413466	63	6.338	Lysophospholipids
Artapetalin A	UACVRGSPUQDTJA-AGRJPVHOSA-N	101175475	CC/C=C\C/C=C\C/C=C\CCCCCCC1=C(C(=C)OC1=O)OC	0.0013	10	101175475	107	8.355	Hydrocarbons, Cyclic
PS(16:022:1(11Z))	JJVQNBMXGKRXMX-LSNKJBRINA-N	52925309	CCCCCCCCCCCCCCCC(=O)OC[C@H](COP(=O)(O)OC[C@@H](C(=O)O)N)OC(=O)CCCCCCCCC/C=C\CCCCCCCCCC	1.9e-05	14	52925309	3	13.631	Phosphatidylserines
PS(18:019:0)	XHYASAVUGBEIOU-GJYFHTIUNA-N	52925427	CCCCCCCCCCCCCCCCCCC(=O)O[C@H](COC(=O)CCCCCCCCCCCCCCCCC)COP(=O)(O)OC[C@@H](C(=O)O)N	1.7e-05	3.5	52925427	79	13.578	Phosphatidylserines
PG(P-18:017:2(9Z12Z))	DTDYQXMNJDUXLI-SXUMEEKUNA-N	52927378	CCCCCCCCCCCCCCCC/C=C\OC[C@H](COP(=O)(O)OC[C@H](CO)O)OC(=O)CCCCCCC/C=C\C/C=C\CCCC	3.6e-06	2.1	52927378	5	14.211	Phosphatidylglycerols
Canavanine	FSBIGDSBMBYOPN-VKHMYHEASA-N	439202	C(CON=C(N)N)[C@@H](C(=O)O)N	4.1e-05	1.7	439202	13	-3.313	Amino Acids
PA(18:018:2(9Z12Z))	QYYWMYCDFOLKKH-DAKWMOBOSA-N	24779559	CCCCCCCCCCCCCCCCCC(=O)OC[C@H](COP(=O)(O)O)OC(=O)CCCCCCC/C=C\C/C=C\CCCCC	0.00093	6.8	24779559	2	15.104	Phosphatidic Acids	M
PE(18:1(9Z)16:0)	DVXMEPWDARXHCX-OTMQOFQLSA-N	9546802	CCCCCCCCCCCCCCCC(=O)O[C@H](COC(=O)CCCCCCC/C=C\CCCCCCCC)COP(=O)(O)OCCN	0.016	3.3	9546802	14	14.036	Phosphatidylethanolamines
Pyriproxyfen	WVIITJBBQPBPEB-UHFFFAOYSA-N	91753	CC(COC1=CC=C(C=C1)OC2=CC=CC=C2)OC3=CC=CC=N3	8.7e-06	2	91753	45	2.799	Pyridines
DG(18:1(9Z)20:5(5Z8Z11Z14Z17Z)0:0)	JLJZWBKQVKCOJP-GZAZVFSZSA-N	9543797	CCCCCCCC/C=C\CCCCCCCC(=O)OC[C@H](CO)OC(=O)CCC/C=C\C/C=C\C/C=C\C/C=C\C/C=C\CC	0.00024	9.4	9543797	47	15.974	Diglycerides
2-Hydroxypyridine	UBQKCCHYAOITMY-UHFFFAOYSA-N	8871	C1=CC(=O)NC=C1	0.0072	4.2	8871	58	-0.113	Pyridines	l
Makaluvamine K	MFJASCFAUMWBMV-UHFFFAOYSA-N	464127	CN1C=C2CCN=C3C2=C1C(=O)C(=C3)NCCC4=CC=C(C=C4)O	0.00022	1.8	464127	43	1.417	Pyridines
PE(P-16:020:5(5Z8Z11Z14Z17Z))	RLLOITCRNQRGJD-DFAKUSJGSA-N	52925061	CCCCCCCCCCCCCC/C=C\OC[C@H](COP(=O)(O)OCCN)OC(=O)CCC/C=C\C/C=C\C/C=C\C/C=C\C/C=C\CC	3e-08	0.08	52925061	14	14.404	Phosphatidylethanolamines
PS(P-16:013:0)	OXGZETUPCROIDN-ZAZBUNNBNA-N	52926184	CCCCCCCCCCCCCC/C=C\OC[C@H](COP(=O)(O)OC[C@@H](C(=O)O)N)OC(=O)CCCCCCCCCCCC	0	0.07	52926184	78	9.564	Phosphatidylserines
PG(16:1(9Z)22:6(4Z7Z10Z13Z16Z19Z))	BRJYLBKRWAAAEC-BHJRESQJSA-N	52927163	CCCCCC/C=C\CCCCCCCC(=O)OC[C@H](COP(=O)(O)OC[C@H](CO)O)OC(=O)CC/C=C\C/C=C\C/C=C\C/C=C\C/C=C\C/C=C\CC	0.0002	3.4	52927163	5	13.556	Phosphatidylglycerols
Fucoxanthinol	NZEPSBGUXWWWSI-KZOZQWPVNA-N	11273547	C/C(=C\C=C\C=C(/C)\C=C\C=C(/C)\C(=O)C[C@]12[C@](O1)(C[C@H](CC2(C)C)O)C)/C=C/C=C(\C)/C=C=C3[C@](C[C@H](CC3(C)C)O)(C)O	0	0.07	11273547	17	9.134	Carotenoids
IC202A	BVRULQCEMCYBAM-UHFFFAOYSA-N	70678744	CCCC/C=[N+](/CCCCNC(=O)CCC(=O)N(CCCCCNC(=O)CCC(=O)N(CCCCCN)O)O)\[O-]	0	0.07	70678744	34	-0.515	Hydroxamic Acids
Zucchini factor B	VKNUHXUEPNYSDN-UHFFFAOYNA-N	131751591	CC1(C(CCC2(C1CC=C3C2=CCC4(C3(CCC5(C4CC(CC5)(C)COC(=O)C6=CC=CC=C6)C)C)C)C)OC(=O)C7=CC=C(C=C7)N)C	0.0033	5.2	131751591	113	11.309
Didemniserinolipid B	FZIDSLBFXPDAQT-AHFSABOBNA-N	129696925	CCOC(=O)/C=C/CCCC[C@@H]1[C@H]2C(CCC(O1)(O2)CCCCCCCCCCCCCCCOCC(COS(=O)(=O)[O-])N)O.[Na+]	0.0011	30	129696925	46	6.268
O-(17-carboxyheptadecanoyl)carnitine	ULCCGBCYWCYNIC-UHFFFAOYNA-N	71464574	C[N+](C)(C)CC(CC(=O)[O-])OC(=O)CCCCCCCCCCCCCCCCC(=O)O	0	0.09	71464574	63	5.913	Carnitine
Askendoside C	CQGUDVRRZKLXFR-YHROOGGHNA-N	14392634	C[C@H](CC[C@H](C(C)(C)O)O)[C@H]1[C@H](C[C@@]2([C@@]1(CC[C@]34[C@H]2C[C@@H]([C@@H]5[C@]3(C4)CC[C@@H](C5(C)C)O[C@H]6[C@@H]([C@H]([C@@H](CO6)O)O)O[C@H]7[C@@H]([C@H]([C@H](CO7)O)O)O)O)C)C)O	0.00068	0.18	14392634	27	3.243	Triterpenes
Gagunin G	BNFUNWYCZCZCDU-AENWMRRKNA-N	10918913	CCCC(=O)O[C@H]1C[C@@]2([C@H](C=C([C@@H]([C@@H]([C@H]2OC(=O)CCC)O)OC(=O)C)C)[C@@H]3[C@]1(C[C@@H]([C@@H]3C(C)C)OC(=O)C)C)C	0.00038	8.4	10918913	6	5.303	Taxoids	u
78-Dehydroastaxanthianthin	BZQRJBLJDFPOBX-FOERLQQGNA-N	131752072	CC1=C(C(CC(C1=O)O)(C)C)/C=C/C(=C/C=C/C(=C\C=C\C=C(/C)\C=C\C=C(\C)/C#CC2=C(C(=O)C(CC2(C)C)O)C)/C)/C	0.00029	3.3	131752072	50	9.662	Xanthophylls
PA(O-16:020:3(8Z11Z14Z))	XAZWQDFVISZXQF-CKXISFNLNA-N	52929639	CCCCCCCCCCCCCCCCOC[C@H](COP(=O)(O)O)OC(=O)CCCCCC/C=C\C/C=C\C/C=C\CCCCC	0.0064	2.7	52929639	2	15.084	Phosphatidic Acids	M
Halstoctacosanolide A	GQHNSYURZJAIPC-IFGCVEQJNA-N	10259958	CCC(C(C)C(CC(C(/C=C(\C)/CC(C)C1CC(C(/C=C/C=C/CC(C(=O)CC2CCC(C(O2)(C/C=C(\C=C(\C(C(=O)/C=C(/C(=O)O1)\C)O)/C)/C)O)C)C)C)O)O)O)O)O	0	2	10259958	38	3.758	Macrolides	S
Bistellettazine A	MGSPLLAFQGMMFJ-AFCHPKOXNA-N	102024644	CC1=C[C@@H]([C@@](CC1)(C)/C=C/C=C(\C)/C=C/C(=O)NCC2CCN3C2CCC3)/C=C(\C)/C=C/C=C(\C)/C(=O)NCC4CCN5C4CCC5	0.00046	3.3	102024644	115	7.669	Pyrrolizidine Alkaloids	X
PS(13:022:1(11Z))	RSPCCVKPCKASFS-LQHYVTKYNA-N	52925199	CCCCCCCCCCCCC(=O)OC[C@H](COP(=O)(O)OC[C@@H](C(=O)O)N)OC(=O)CCCCCCCCC/C=C\CCCCCCCCCC	1e-08	1.9	52925199	3	11.924	Phosphatidylserines
Cyclopassifloside VII	MOYBUGGNPKXCHY-UHFFFAOYNA-N	73801616	CC(C)C(CCC(C)(C1C(CC2(C1(CCC34C2CCC5C3(C4)C(CC(C5(C)C(=O)OC6C(C(C(C(O6)CO)O)O)O)O)O)C)C)O)O)(CO)O	1.6e-05	1.7	73801616	82	2.8	Glycosides
Spirilloxanthin	VAZQBTJCYODOSV-HZUCFJANSA-N	5366506	C/C(=C\C=C\C(=C\C=C\C(=C\C=C\C=C(\C=C\C=C(\C=C\C=C(\C=C\CC(OC)(C)C)/C)/C)/C)\C)\C)/C=C/CC(OC)(C)C	4.5e-05	0.84	5366506	54	13.18	Xanthophylls
Latoxanthin	IHFACKVTKFGBBA-YFUVOBOANA-N	102150983	C/C(=C\C=C\C=C(/C)\C=C\C=C(/C)\C=C\[C@]12[C@](O1)(C[C@H](CC2(C)C)O)C)/C=C/C=C(\C)/C=C/[C@@]3([C@](C[C@H](CC3(C)C)O)(C)O)O	0.016	6.4	102150983	17	8.375	Carotenoids
PC(P-16:014:1(9Z))	RMEZSZVJIYBBIJ-MWXRYAQWSA-N	52923876	CCCCCCCCCCCCCC/C=C\OC[C@H](COP(=O)([O-])OCC[N+](C)(C)C)OC(=O)CCCCCCC/C=C\CCCC	0.00029	0.64	52923876	81	12.736	Phosphatidylcholines
PI(22:2(13Z16Z)18:0)	AGRIIGVRFSIIFE-SJURNENZNA-N	52928189	CCCCCCCCCCCCCCCCCC(=O)O[C@H](COC(=O)CCCCCCCCCCC/C=C\C/C=C\CCCCC)COP(=O)(O)OC1C([C@@H](C(C(C1O)O)O)O)O	0.0034	8.9	52928189	24	16.082	Phosphatidylinositols
PA(19:022:4(7Z10Z13Z16Z))	HGHZFVJKBVRZOK-HCCSWTPFNA-N	52929069	CCCCCCCCCCCCCCCCCCC(=O)OC[C@H](COP(=O)(O)O)OC(=O)CCCCC/C=C\C/C=C\C/C=C\C/C=C\CCCCC	0.0043	8.4	52929069	2	17.295	Phosphatidic Acids	M
PE-Cer(d14:2(4E6E)24:1(15Z))	QFUFVSYJHLNTNO-XJQRGJTPNA-N	70699020	CCCCCCCC/C=C\CCCCCCCCCCCCCC(=O)N[C@@H](COP(=O)(O)OCCN)[C@@H](/C=C/C=C/CCCCCCC)O	0.0046	9.4	70699020	46	13.774
Ginsenoside Rg5	NJUXRKMKOFXMRX-JJFYIABZNA-N	11550001	CC(=CC/C=C(\C)/[C@H]1CC[C@@]2([C@@H]1[C@@H](C[C@H]3[C@]2(CC[C@@H]4[C@@]3(CC[C@@H](C4(C)C)O[C@H]5[C@@H]([C@H]([C@@H]([C@H](O5)CO)O)O)O[C@H]6[C@@H]([C@H]([C@@H]([C@H](O6)CO)O)O)O)C)C)O)C)C	0.0038	7.9	11550001	7	6.506	Triterpenes	Q
Cyclocanthoside A	WWWSFRYQXBVZOD-FXPVXXKYNA-N	21633192	C[C@H](CC[C@@H](C(C)(C)O)O)[C@H]1[C@H](C[C@@]2([C@@]1(CC[C@]34[C@H]2C[C@@H]([C@@H]5[C@]3(C4)CC[C@@H](C5(C)C)O[C@H]6[C@@H]([C@H]([C@@H](CO6)O)O)O)O)C)C)O	0.0073	9	21633192	27	4.537	Spirostans
PA(18:4(6Z9Z12Z15Z)18:3(6Z9Z12Z))	ALOGJFKHMXDEGC-LNKMRZDISA-N	52929030	CCCCC/C=C\C/C=C\C/C=C\CCCCC(=O)O[C@H](COC(=O)CCCC/C=C\C/C=C\C/C=C\C/C=C\CC)COP(=O)(O)O	0.0031	8.4	52929030	84	13.28	Phosphatidic Acids
Astaxanthin	MQZIGYBFDRPAKN-IDLFNPRFNA-N	5281224	CC1=C(C(C[C@@H](C1=O)O)(C)C)/C=C/C(=C/C=C/C(=C/C=C/C=C(/C=C/C=C(/C=C/C2=C(C(=O)[C@H](CC2(C)C)O)C)\C)\C)/C)/C	0.0038	6.9	5281224	50	9.696	Xanthophylls
Rubixanthin	ABTRFGSPYXCGMR-KZLGKGLPNA-N	5281252	CC1=C(C(C[C@@H](C1)O)(C)C)/C=C/C(=C/C=C/C(=C/C=C/C=C(\C)/C=C/C=C(\C)/C=C/C=C(\C)/CCC=C(C)C)/C)/C	0.0095	7.7	5281252	50	12.575	Carotenoids
DG(18:4(6Z9Z12Z15Z)18:3(9Z12Z15Z)0:0)	RKSUIYABXCMIDT-NSCDTNHQSA-N	53478166	CC/C=C\C/C=C\C/C=C\CCCCCCCC(=O)O[C@@H](CO)COC(=O)CCCC/C=C\C/C=C\C/C=C\C/C=C\CC	0.012	3.1	53478166	47	14.509	Diglycerides
Plakinamine H	VKUXLFCVHPEFNU-SGSUXEKXNA-N	101194562	CC1=C(CCNC1)/C=C/[C@H](C)[C@H]2CC[C@@H]3[C@@]2(CC[C@H]4C3=CCC5[C@@]4(CC[C@@H](C5=O)N(C)C)C)C	0.0052	6.3	101194562	115	6.609		X
Mycolactone	WKTLNJXZVDLRTJ-QRRXZRELSA-N	5282079	C[C@H]1C/C(=C/C[C@@H](OC(=O)CCC[C@@H]1OC(=O)/C=C/C(=C/C(=C/C=C/C(=C/[C@@H]([C@H](C[C@H](C)O)O)O)/C)/C)/C)[C@@H](C)C/C(=C/[C@@H](C)[C@@H](C[C@@H](C)O)O)/C)/C	0.0042	7.1	5282079	38	6.738	Macrolides	S
(EE)-44''-Bi(N-4-hydroxycinnamoylserotonin)	OIUNULHHOJRJBI-IAGONARPSA-N	11764751	C1=CC(=CC=C1/C=C/C(=O)NCCC2=CNC3=C2C(=C(C=C3)O)C4=C(C=CC5=C4C(=CN5)CCNC(=O)/C=C/C6=CC=C(C=C6)O)O)O	0.0048	3.8	11764751	39	2.7	Serotonin	h
chlorophyllide a	AXNGBNDQHOVSCG-UHFFFAOYNA-L	439664	CCC1=C(C2=NC1=CC3=C(C4=C([N-]3)C(=C5[C@H]([C@@H](C(=N5)C=C6C(=C(C(=C2)[N-]6)C=C)C)C)CCC(=O)O)[C@H](C4=O)C(=O)OC)C)C.[Mg+2]	0.0033	5.4	439664	22	1.505	Chlorophyllides
PG(22:019:0)	LXPGMLUUADAOEK-SXXWNBANNA-N	52926979	CCCCCCCCCCCCCCCCCCCCCC(=O)OC[C@H](COP(=O)(O)OC[C@H](CO)O)OC(=O)CCCCCCCCCCCCCCCCCC	4.8e-06	1.5	52926979	77	17.93	Phosphatidylglycerols	W
PG(22:017:1(9Z))	AEKHDJYUSOPTLS-SBFFLVDMNA-N	52926973	CCCCCCCCCCCCCCCCCCCCCC(=O)OC[C@H](COP(=O)(O)OC[C@H](CO)O)OC(=O)CCCCCCC/C=C\CCCCCCC	0.00017	1.3	52926973	5	16.276	Phosphatidylglycerols
Nb-Tricosanoyltryptamine	XJUYJAIYKWBPLY-UHFFFAOYSA-N	10625101	CCCCCCCCCCCCCCCCCCCCCCC(=O)NCCC1=CNC2=CC=CC=C21	0.0052	2	10625101	83	12.567	Indoles	m
PS(21:018:0)	AWLOVRYKWYZEEW-WMQSFMSKNA-N	52925962	CCCCCCCCCCCCCCCCCCCCC(=O)OC[C@H](COP(=O)(O)OC[C@@H](C(=O)O)N)OC(=O)CCCCCCCCCCCCCCCCC	0.002	1.2	52925962	79	14.716	Phosphatidylserines
44'-diapolycopene	HGWBSMBLLOMJGT-DADBORHESA-N	16061259	CC(=C/C=C/C(=C/C=C/C(=C/C=C/C=C(/C=C/C=C(/C=C/C=C(C)C)\C)\C)/C)/C)C	0.0018	5	16061259	54	10.942	Carotenoids
PG(P-16:014:1(9Z))	UERLHGISINMPNT-SAFJEPRONA-N	52927344	CCCCCCCCCCCCCC/C=C\OC[C@H](COP(=O)(O)OC[C@H](CO)O)OC(=O)CCCCCCC/C=C\CCCC	0.012	1.2	52927344	5	11.693	Phosphatidylglycerols
PS(O-20:019:1(9Z))	FTTXHVPJDSNJJK-HGAFSJOLNA-N	52926147	CCCCCCCCCCCCCCCCCCCCOC[C@H](COP(=O)(O)OC[C@@H](C(=O)O)N)OC(=O)CCCCCCC/C=C\CCCCCCCCC	3.1e-07	1.2	52926147	3	14.507	Phosphatidylserines
44'-Diapo-zeta-carotene	JJMKRPXUHIPSAW-ZOKJSSERSA-N	11315692	CC(=CCC/C(=C/C=C/C(=C/C=C/C=C(/C=C/C=C(/CCC=C(C)C)\C)\C)/C)/C)C	0.00032	0.71	11315692	54	11.026	Carotenoids
PA(22:2(13Z16Z)18:0)	CJJKZZHVEPXAAM-JMMITYAOSA-N	52929359	CCCCCCCCCCCCCCCCCC(=O)O[C@H](COC(=O)CCCCCCCCCCC/C=C\C/C=C\CCCCC)COP(=O)(O)O	2e-06	1.2	52929359	2	17.38	Phosphatidic Acids	M
128-Octacosanediol diferulate	BNCYSRWQCKLMQU-QUTRQNJUSA-N	131752291	COC1=C(C=C(C=C1)/C=C/C(=O)OCCCCCCCCCCCCCCCCCCCCCCCCCCCCOC(=O)/C=C/C2=CC(=C(C=C2)OC)O)O	1e-08	1.7	131752291	61	15.942	Cinnamates
PA(O-18:020:3(8Z11Z14Z))	BRNNIAKTNFKUHP-WKKVZDAJNA-N	52929600	CCCCCCCCCCCCCCCCCCOC[C@H](COP(=O)(O)O)OC(=O)CCCCCC/C=C\C/C=C\C/C=C\CCCCC	0	1.6	52929600	2	16.222	Phosphatidic Acids	M
Petroformyne 1	JMDLXSJNUCOOQN-KRECXNKNNA-N	44567089	C#C[C@H](/C=C/CCCCCCCCCCCCC/C=C\CC/C=C/C#C[C@H](C#CCCCC/C=C\CCCCCC/C=C/[C@@H](C#C)O)O)O	1e-08	1.6	44567089	25	15.763	Saturated FA
Pyrinodemin C	FRALZFIIIKECNY-WAJAPOGWNA-N	10007959	C1C[C@H]2[C@@H](C1)N(O[C@H]2CCCCCCCCC3=CN=CC=C3)CCC/C=C\CCCCCCCCC4=CN=CC=C4	0.0029	1.1	10007959	31	9.132	Pyridines	n
DG(15:1(9Z)22:6(4Z7Z10Z13Z16Z19Z)0:0)iso2	PBTFNQHSIYCLII-ZOQJCQFXNA-N	56936389	CCCCC/C=C\CCCCCCCC(=O)OC[C@H](CO)OC(=O)CC/C=C\C/C=C\C/C=C\C/C=C\C/C=C\C/C=C\CC	5.5e-07	1.5	56936389	47	15.078	Diglycerides
Alpha-Carotene	ANVAOWXLWRTKGA-JLTXGRSLNA-N	4369188	CC1=C(C(CCC1)(C)C)/C=C/C(=C/C=C/C(=C/C=C/C=C(\C)/C=C/C=C(\C)/C=C/C2C(=CCCC2(C)C)C)/C)/C	0.011	8.3	4369188	42	15.187	Carotenoids
Methyl pheophorbide a	IWKYEJKHXKRZIJ-PIEZJCHHNA-N	135407639	CCC1=C(C2=NC1=CC3=C(C4=C([C@@H](C(=C5[C@H]([C@@H](C(=CC6=NC(=C2)C(=C6C)C=C)N5)C)CCC(=O)OC)C4=N3)C(=O)OC)O)C)C	0.0043	4.9	135407639	22	2.923	Chlorophyllides
Durissimol B	WAHSICHAYKKWOI-NHQGMKOONA-N	10368409	C#CC(/C=C/CCCCCCCCCCCCC#CCCCCCCCCCCC#CC#CCO)O	0.0025	0.82	10368409	25	12.559	Saturated FA
